# Supplementary material for: Effect of Carbohydrate-Restricted Diets and Intermittent Fasting on Obesity, Type 2 Diabetes Mellitus, and Hypertension Management: Consensus Statement of the Korean Society for the Study of Obesity, Korean Diabetes Association, and Korean Society of Hypertension
Source: PubMed Central journal article supplement — J Obes Metab Syndr. 2022 Jun 7;31(2):100–22. doi: 10.7570/jomes22009 (PMC9284571; doi:10.7570/jomes22009), 2022-06-07
Supplement: jomes-31-2-100-supple.pdf [file jomes-31-2-100-supple.pdf]

**Supplementary Table 1.** Search strategy in Medline through PubMed

|     |                                                                                                                                                                                                                                                                             |
|-----|-----------------------------------------------------------------------------------------------------------------------------------------------------------------------------------------------------------------------------------------------------------------------------|
| 1.  | "Diet, Carbohydrate-Restricted" [Mesh]                                                                                                                                                                                                                                      |
| 2.  | (Diet [TIAB] OR diets [TIAB] OR dietary [TIAB]) AND ((carbohydrate [TIAB] OR Carbohydrates [TIAB]) AND (Restricted [TIAB] OR Low [TIAB] OR restriction [TIAB] OR restrictive [TIAB] OR Reducing [TIAB] OR Reduction [TIAB] OR Modification [TIAB] OR Modifications [TIAB])) |
| 3.  | (Diet [TIAB] OR Diets [TIAB]) AND Ketogenic [TIAB]                                                                                                                                                                                                                          |
| 4.  | (Intermittent [TIAB] OR "time restricted" [TIAB] OR Alternate [TIAB] OR periodic [TIAB] OR ramadan [TIAB]) AND (Fasting [TIAB] OR energy [TIAB] OR feeding [TIAB] OR diet [TIAB] OR diets [TIAB] OR meal [TIAB] OR eating [TIAB] OR caloric [TIAB] OR calorie [TIAB])       |
| 5.  | "meal skipping" [TIAB] OR "meal frequency" [TIAB]                                                                                                                                                                                                                           |
| 6.  | 1–5/OR                                                                                                                                                                                                                                                                      |
| 7.  | 6 AND (groups [tiab] OR trial [TIAB] OR randomly [TIAB] OR placebo [TIAB] OR randomized [TIAB] OR "controlled clinical trial" [PT] OR "randomized controlled trial" [PT]) NOT (animals [MH] NOT (humans [MH] AND animals [MH]))                                             |
| 8.  | 7 AND Filters applied: from 2000/1/1 – 2021/6/8                                                                                                                                                                                                                             |
| 9.  | 8 NOT "review" [Publication Type] OR "review literature as topic" [MeSH Terms]                                                                                                                                                                                              |
| 10. | 9 NOT (meta-analysis [Filter] OR systematic review [Filter])                                                                                                                                                                                                                |

**Supplementary Table 2.** The framework of PICO in developing the focused question

| PICO             | Description of detail                                                                                                                                                                                                                                                |
|------------------|----------------------------------------------------------------------------------------------------------------------------------------------------------------------------------------------------------------------------------------------------------------------|
| Population (P)   | <ul style="list-style-type: none"> <li>• Obese or overweight adults (BMI <math>\geq</math> 23 kg/m<sup>2</sup>) or</li> <li>• Patients with T2DM or</li> <li>• Patients with hypertension</li> </ul>                                                                 |
| Intervention (I) | <ul style="list-style-type: none"> <li>• PICO1: carbohydrate-restricted diets: moderately-low, low, very-low carbohydrate diet or</li> <li>• PICO2: intermittent fasting: time-restriction eating, alternate-day fasting, intermittent energy restriction</li> </ul> |
| Comparator (C)   | Isocaloric diets: standard, calorie-restricted, low-fat, Mediterranean, DASH diets, etc.                                                                                                                                                                             |
| Outcome (O)      | Body weight, BMI, WC, fat mass, fat-free mass, blood pressure, lipid profile (TC, LDL-C, HDL-C, TG), HbA1c, fasting plasma glucose, fasting plasma insulin, HOMA-IR, CRP, adiponectin, FMD, adverse effects, etc.                                                    |
| Study design (S) | Randomized controlled clinical trials that conducted more than 8 weeks                                                                                                                                                                                               |
| Target           | <ul style="list-style-type: none"> <li>• Obese or overweight adults or</li> <li>• Patients with T2DM or</li> <li>• Patients with hypertension</li> <li>• Healthcare professionals who manage patients with obesity, T2DM, or hypertension</li> </ul>                 |

PICO, population, intervention, comparator, outcome; BMI, body mass index; T2DM, type 2 diabetes mellitus; DASH, dietary approaches to stop hypertension; WC, waist circumference; TC, total cholesterol; LDL-C, low-density lipoprotein cholesterol; HDL-C, high-density lipoprotein cholesterol; TG, triglyceride; HbA1c, glycosylated hemoglobin; HOMA-IR, homeostatic model assessment for insulin resistance; CRP, C-reactive protein; FMD, flow-mediated dilation.

**Supplementary Table 3.** Characteristics of randomized controlled trials included in the meta-analysis to evaluate the effects of carbohydrate-restricted diets

| Study                                                                                                                          | Population    | Nationality | Duration of study | Control | Intervention | Follow-up loss rate (control:intervention) (%) | Subject number | Asian (%) | FPG (mg/dL) | TC (mg/dL) | TG (mg/dL) | LDL-C (mg/dL) | HDL-C (mg/dL) | BW (kg) | BMI (kg/m <sup>2</sup> ) | HbA1c (%) | SBP (mmHg) | DBP (mmHg) |
|--------------------------------------------------------------------------------------------------------------------------------|---------------|-------------|-------------------|---------|--------------|------------------------------------------------|----------------|-----------|-------------|------------|------------|---------------|---------------|---------|--------------------------|-----------|------------|------------|
| Aronica et al. (2021) <sup>16</sup>                                                                                            | Ob            | US          | 1 yr              | LFD     | LCD          | 21.0:21.1                                      | 609            | 9.9       | 98.6        | NA         | 128.4      | 112.9         | 49.9          | 96.9    | 33.4                     | NA        | 122.9      | 81.1       |
| Bazzano et al. (2014) <sup>17,18</sup>                                                                                         | Ob            | US          | 1 yr              | LFD     | VLCD         | 17.8:21.3                                      | 148            | 0.7       | 94.0        | 201.5      | 119.0      | 122.6         | 55.1          | 97.1    | 35.4                     | NA        | 122.6      | 78.4       |
| Bhattacharya et al. (2012) <sup>19</sup>                                                                                       | Ob            | India       | 6 mo              | SD      | VLCD         | NA                                             | 150            | NA        | NA          | NA         | NA         | NA            | NA            | NA      | 27.1                     | NA        | NA         | NA         |
| Brinkworth et al. (2004) <sup>20</sup>                                                                                         | Ob            | Australia   | 1 yr              | SD      | MCD          | 24.1:27.6                                      | 43             | NA        | 96.3        | NA         | NA         | NA            | NA            | 94.0    | 34.1                     | NA        | NA         | NA         |
| Brinkworth et al. (2009) <sup>21</sup> ,<br>Brinkworth et al. (2010) <sup>22</sup> ,<br>Brinkworth et al. (2011) <sup>23</sup> | Ob, HTN       | Australia   | 1 yr              | LFD     | VLCD         | 40.9:42.1                                      | 118            | NA        | 101.8       | 210.8      | 153.9      | 127.7         | 54.3          | 95.3    | 33.7                     | NA        | 134.0      | 74.8       |
| Wycherley et al. (2011) <sup>24</sup> ,<br>Tay et al. (2008) <sup>25</sup> ,<br>Wycherley et al. (2010) <sup>26</sup>          | Ob            | New Zealand | 3 mo              | LFD     | MCD          | 40:33                                          | 41             | 0         | 92.7        | NA         | 128.4      | 112.1         | 44.5          | 91.8    | 31.1                     | 5.4       | NA         | NA         |
| Cardillo et al. (2006) <sup>27</sup>                                                                                           | Ob            | US          | 3 yr              | LFD     | VLCD         | NA                                             | 53             | NA        | 116.5       | NA         | NA         | NA            | NA            | NA      | 43.3                     | NA        | NA         | NA         |
| Zinn et al. (2017) <sup>28</sup>                                                                                               | Ob            | New Zealand | 3 mo              | LFD     | MCD          | 40:33                                          | 41             | 0         | 92.7        | NA         | 128.4      | 112.1         | 44.5          | 91.8    | 31.1                     | 5.4       | NA         | NA         |
| Chen et al. (2020) <sup>29</sup>                                                                                               | Ob, T2DM, HTN | Taiwan      | 18 mo             | SD      | LCD          | 6.7:8.5                                        | 85             | 100       | 160.3       | 177.6      | 170.7      | 103.4         | 45.4          | 69.0    | 26.9                     | 8.6       | 130.4      | 75.4       |
| Daly et al. (2006) <sup>30</sup>                                                                                               | Ob, T2DM, HTN | UK          | 3 mo              | LFD     | LCD          | 27.5:27.5                                      | 102            | NA        | 209.7       | 189.5      | 224.1      | NA            | 46.8          | 102.0   | 36.1                     | 9.1       | 142.2      | 79.5       |
| Davis et al. (2009) <sup>31</sup>                                                                                              | Ob, T2DM      | US          | 1 yr              | LFD     | LCD          | 12:14.6                                        | 105            | 2.9       | NA          | 168.3      | 124.0      | 94.8          | 48.4          | 97.1    | 36.0                     | 7.5       | 127.4      | 74.9       |
| de Jonge et al. (2012) <sup>32</sup>                                                                                           | Ob            | US          | 2 yr              | NGD     | MCD          | 39:39                                          | 81             | NA        | NA          | NA         | NA         | NA            | NA            | 92.9    | 32.7                     | NA        | NA         | NA         |
| de Luis et al. (2007) <sup>33</sup>                                                                                            | Ob            | Spain       | 3 mo              | LFD     | MCD          | NA                                             | 90             | NA        | NA          | NA         | NA         | NA            | NA            | 93.4    | 35.7                     | NA        | NA         | NA         |
| de Luis et al. (2015) <sup>34</sup>                                                                                            | Ob            | Spain       | 9 mo              | CRD     | MCD          | NA                                             | 193            | NA        | 102.0       | 207.2      | 127.6      | 125.8         | 54.5          | 93.7    | 36.2                     | NA        | 129.0      | 81.2       |
| de Luis et al. (2015) <sup>35</sup>                                                                                            | Ob            | Spain       | 9 mo              | CRD     | MCD          | NA                                             | 195            | 0         | 101.0       | 209.4      | 124.5      | 128.5         | 54.6          | 93.7    | 35.7                     | NA        | 129.5      | 82.1       |
| de Luis et al. (2016) <sup>36</sup>                                                                                            | Ob            | Spain       | 9 mo              | CRD     | MCD          | NA                                             | 283            | NA        | 102.6       | 206.0      | 123.0      | 126.1         | 55.9          | 91.1    | 35.1                     | NA        | 127.3      | 81.1       |
| de Luis et al. (2019) <sup>37</sup>                                                                                            | Ob            | Spain       | 9 mo              | CRD     | LCD          | NA                                             | 270            | 0         | 103.0       | 208.5      | 123.7      | 127.7         | 55.6          | 92.0    | 34.5                     | NA        | 127.0      | 82.3       |
| Dyson et al. (2007) <sup>38</sup>                                                                                              | Ob, T2DM      | UK          | 3 mo              | CRD     | VLCD         | 28.6:0                                         | 26             | NA        | NA          | 197.2      | 131.1      | 119.9         | 51.0          | 96.3    | 35.1                     | 6.6       | NA         | NA         |
| Foraker et al. (2014) <sup>39</sup>                                                                                            | Ob            | US          | 1 yr              | LFD     | MCD          | 0                                              | 79             | NA        | NA          | 194.2      | NA         | 123.1         | 53.0          | NA      | 30.3                     | NA        | 121.8      | 74.5       |
| Forsythe et al. (2008) <sup>40,41</sup>                                                                                        | Ob            | US          | 3 mo              | LFD     | LCD          | 0                                              | 40             | NA        | NA          | 206.0      | 199.0      | 129.2         | 37.3          | NA      | NA                       | NA        | NA         | NA         |
| Foster et al. (2010) <sup>42</sup>                                                                                             | Ob            | US          | 2 yr              | CRD     | LCD          | 32:42                                          | 307            | <1        | NA          | 190.5      | 118.7      | 122.1         | 45.8          | 103.4   | 36.1                     | NA        | 124.5      | 95.0       |
| Foster et al. (2003) <sup>43</sup>                                                                                             | Ob            | US          | 1 yr              | CRD     | VLCD         | 39:43                                          | 63             | 0         | NA          | 197.3      | 127.1      | 124.9         | 48.0          | 98.5    | 34.1                     | NA        | 121.8      | 76.0       |
| Frisch et al. (2009) <sup>44</sup>                                                                                             | Ob            | Germany     | 1 yr              | LFD     | MCD          | 20:15                                          | 200            | 0         | 1.0         | 213.5      | 119.6      | 137.3         | 57.2          | 99.6    | 33.7                     | 5.6       | 127.0      | 86.0       |
| Gardner et al. (2007) <sup>45</sup>                                                                                            | Ob            | US          | 1 yr              | NGD     | MCD/VLCD     | 2.6:22.8:11.7                                  | 311            | 10.0      | 94.0        | NA         | 121.0      | 110.0         | 52.0          | 85.0    | 32.0                     | NA        | 116.0      | 75.0       |
| Goday et al. (2016) <sup>46</sup>                                                                                              | Ob, T2DM      | Spain       | 4 mo              | CRD     | VLCD         | 18.2:11.1                                      | 89             | NA        | 139.8       | 190.8      | 155.2      | 106.3         | 53.0          | 90.5    | 33.1                     | 6.9       | NA         | NA         |
| Goldstein et al. (2011) <sup>47</sup>                                                                                          | Ob, T2DM      | Israel      | 1 yr              | CRD     | VLCD         | 38.5:46.2                                      | 52             | NA        | 188.5       | 197.0      | 200.5      | NA            | 44.0          | 92.0    | 33.2                     | 8.9       | 138.0      | 79.5       |
| Guldbrand et al. (2012) <sup>48</sup> ,<br>Jonasson et al. (2014) <sup>49</sup>                                                | Ob, T2DM      | Sweden      | 2 yr              | LFD     | LCD          | 10:13                                          | 61             | NA        | NA          | 168.7      | 155.3      | 97.7          | 42.6          | 95.2    | 32.7                     | 7.3       | 135.5      | 76.5       |
| Haufe et al. (2011, 2012) <sup>50,51</sup>                                                                                     | Ob            | Germany     | 6 mo              | LFD     | LCD          | 40:35                                          | 102            | NA        | 94.5        | 87.8       | 103.6      | 117.6         | 53.4          | 92.6    | 33.0                     | NA        | NA         | NA         |

(Continued to the next page)

Supplementary Table 3. Continued

| Study                                       | Population    | Nationality | Duration of study | Control | Intervention | Follow-up/loss rate (control:intervention) (%) | Subject number | Asian (%) | FFG (mg/dL) | TC (mg/dL) | TG (mg/dL) | LDL-C (mg/dL) | HDL-C (mg/dL) | BW (kg) | BMI (kg/m <sup>2</sup> ) | HbA1c (%) | SBP (mmHg) | DBP (mmHg) |  |
|---------------------------------------------|---------------|-------------|-------------------|---------|--------------|------------------------------------------------|----------------|-----------|-------------|------------|------------|---------------|---------------|---------|--------------------------|-----------|------------|------------|--|
| Iqbal et al. (2010) <sup>52</sup>           | Ob, T2DM, HTN | US          | 2 yr              | LFD     | VLCD         | 43:60                                          | 144            | 0.0       | 151.4       | 180.4      | 161.1      | 107.7         | 40.7          | 116.9   | 37.5                     | 7.7       | 139.9      | 79.4       |  |
| Jabekk et al. (2010) <sup>53</sup>          | Ob            | Norway      | 10 wk             | SD      | VLCD         | 11:11                                          | 16             | NA        | NA          | NA         | NA         | NA            | NA            | 90.9    | 32.3                     | NA        | NA         | NA         |  |
| Jenkins et al. (2014) <sup>54</sup>         | Ob            | Canada      | 7 mo              | NGD     | MCD          | 32:50                                          | 39             | 4.5       | 88.2        | 263.0      | 194.9      | 174.0         | 50.3          | 84.5    | 31.1                     | 5.3       | 125.1      | 76.0       |  |
| Keogh et al. (2007) <sup>55</sup>           | Ob            | Australia   | 1 yr              | CRD     | LCD          | NA                                             | 25             | NA        | 106.2       | 5.5        | 1.6        | 3.7           | 1.3           | 94.2    | 32.9                     | NA        | 122.0      | 75.0       |  |
| Kimura et al. (2018) <sup>56</sup>          | T2DM          | Japan       | 3 mo              | CRD     | MCD          | 4:3:4                                          | 48             | 100       | NA          | NA         | 140.3      | 114.4         | 60.5          | 62.8    | 24.8                     | 7.0       | NA         | NA         |  |
| Kreider et al. (2011) <sup>57</sup>         | Ob            | US          | 10 wk             | SD      | LCD          | NA                                             | 221            | NA        | 99.8        | 199.6      | 136.3      | 120.2         | 52.8          | 90.3    | 33.8                     | NA        | 124.6      | 81.8       |  |
| Larsen et al. (2011) <sup>58</sup>          | Ob, T2DM      | Australia   | 1 yr              | NCD     | MCD          | 2.2:9.4                                        | 99             | NA        | NA          | 182.5      | 210.8      | 95.1          | 46.2          | 95.0    | NA                       | 7.8       | 129.8      | 81.5       |  |
| Liu et al. (2018) <sup>59</sup>             | T2DM          | China       | 3 mo              | SD      | MCD          | 16.3:16.3                                      | 122            | 100       | 150.6       | 153.9      | 116.9      | 79.9          | 56.7          | 58.5    | 21.4                     | 7.1       | 105.0      | 76.6       |  |
| Liu et al. (2013) <sup>60</sup>             | Ob            | China       | 3 mo              | LFD     | LCD          | 4:4                                            | 50             | 100       | 109.4       | 197.2      | 133.8      | 130.3         | 51.8          | 65.9    | 26.7                     | NA        | 132.7      | 86.0       |  |
| Meckling et al. (2004) <sup>61</sup>        | Ob            | Canada      | 10 wk             | CRD     | LCD          | 20:25                                          | 40             | 0         | 105.5       | 229.0      | 135.0      | 167.0         | 50.5          | 91.7    | 32.2                     | NA        | 123.1      | 77.8       |  |
| Morris et al. (2020) <sup>62</sup>          | Ob, T2DM      | UK          | 3 mo              | SD      | LCD          | 8:3:0                                          | 33             | 0         | 168.8       | 166.7      | 172.7      | NA            | 45.2          | 101.0   | 35.4                     | 7.7       | 140.0      | 82.0       |  |
| Noakes et al. (2006, 2010) <sup>63,64</sup> | Ob            | Australia   | 15 mo             | VLFD    | VLCD         | 0                                              | 67             | NA        | 95.9        | 227.4      | 145.4      | 149.3         | 49.5          | NA      | 32.8                     | NA        | NA         | NA         |  |
| Perna et al. (2019) <sup>65</sup>           | Ob, T2DM      | Bahrain     | 3 mo              | CRD     | LCD          | 0                                              | 17             | 100       | 108.5       | 178.9      | 156.5      | 100.2         | 47.4          | 85.3    | 31.4                     | 6.0       | NA         | NA         |  |
| Ruth et al. (2013) <sup>66</sup>            | Ob            | US          | 3 mo              | LFD     | VLCD         | 37.9:42.3                                      | 55             | NA        | 84.0        | 182.3      | 106.5      | 109.4         | 51.6          | 99.9    | 36.5                     | 5.7       | 119.9      | 76.6       |  |
| Saslow et al. (2017) <sup>67</sup>          | Ob, T2DM      | US          | 1 yr              | LFD     | VLCD         | 16.7:12.5                                      | 34             | 14.7      | NA          | NA         | 132.4      | 93.7          | 47.0          | 98.6    | 36.4                     | 6.8       | 128.2      | 79.2       |  |
| Sato et al. (2017) <sup>68</sup>            | Ob, T2DM      | Japan       | 6 mo              | CRD     | LCD          | 3:9                                            | 66             | 100       | 126.1       | NA         | 145.5      | 99.3          | 45.3          | 73.8    | 26.6                     | 8.2       | NA         | NA         |  |
| Shai et al. (2008) <sup>69</sup>            | Ob            | Israel      | 2 yr              | LFD     | LCD          | 9.6:22.0                                       | 213            | NA        | 91.3        | NA         | 170.8      | 119.0         | 38.5          | 91.4    | 30.9                     | NA        | 131.3      | 79.7       |  |
| Yokose et al. (2020) <sup>70</sup>          |               |             |                   |         |              |                                                |                |           |             |            |            |               |               |         |                          |           |            |            |  |
| Soenen et al. (2012) <sup>71</sup>          | Ob            | Netherlands | 1 yr              | CRD     | LCD          | 4.3:5.7                                        | 132            | NA        | 97.7        | 191.4      | 143.9      | 112.1         | 52.2          | 106.7   | 36.8                     | NA        | 130.5      | 82.3       |  |
| Stem et al. (2004) <sup>72</sup>            | Ob, HTN       | US          | 1 yr              | LFD     | VLCD         | 36.8:31.3                                      | 132            | 0         | 126.1       | 186.3      | 182.2      | 115.9         | 41.0          | 130.9   | 42.9                     | NA        | 134.0      | 79.0       |  |
| Samaha et al. (2003) <sup>73</sup>          |               |             |                   |         |              |                                                |                |           |             |            |            |               |               |         |                          |           |            |            |  |
| Struik et al. (2020) <sup>74</sup>          | Ob, T2DM, HTN | Australia   | 2 yr              | LFD     | LCD          | 18:21                                          | 115            | NA        | 145.8       | 166.3      | 132.9      | 92.8          | 51.0          | 101.6   | 34.6                     | 7.3       | 131.4      | 80.7       |  |
| Wycheley et al. (2016) <sup>75</sup>        |               |             |                   |         |              |                                                |                |           |             |            |            |               |               |         |                          |           |            |            |  |
| Tay et al. (2015) <sup>76</sup>             |               |             |                   |         |              |                                                |                |           |             |            |            |               |               |         |                          |           |            |            |  |
| Tay et al. (2018) <sup>77</sup>             |               |             |                   |         |              |                                                |                |           |             |            |            |               |               |         |                          |           |            |            |  |
| Tay et al. (2014) <sup>78</sup>             |               |             |                   |         |              |                                                |                |           |             |            |            |               |               |         |                          |           |            |            |  |
| Tsai et al. (2005) <sup>79</sup>            | Ob            | US          | 1 yr              | SD      | VLCD         | 4:4:0                                          | 129            | 0         | 125.9       | NA         | NA         | 115.0         | NA            | NA      | 42.9                     | NA        | 134.0      | NA         |  |
| Wang et al. (2018) <sup>80</sup>            | T2DM          | China       | 3 mo              | LFD     | MCD          | 4:3:4                                          | 48             | 100       | NA          | NA         | 140.3      | 114.4         | 60.5          | 62.8    | 24.8                     | 7.0       | NA         | NA         |  |
| Yancy et al. (2004) <sup>81</sup>           | Ob            | US          | 6 mo              | LFD     | VLCD         | 43.3:23.7                                      | 119            | NA        | NA          | 242.2      | 174.4      | 152.6         | 54.7          | 97.3    | 34.3                     | NA        | NA         | NA         |  |

FFG, fasting plasma glucose; TC, total cholesterol; TG, triglyceride; LDL-C, low-density lipoprotein cholesterol; HDL-C, high-density lipoprotein cholesterol; BW, body weight; BMI, body mass index; HbA1c, glycosylated hemoglobin; SBP, systolic blood pressure; DBP, diastolic blood pressure; Ob, obesity or overweight; LFD, low fat diet; LCD, low carbohydrate diet; NA, not available; VLCD, very-low carbohydrate diet; SD, standard diet; MCD, moderately-low carbohydrate diet; HTN, hypertension; T2DM, type 2 diabetes mellitus; NCD, normal carbohydrate diet; CRD, calorie-restricted diet; VLCD, very-low fat diet.

**Supplementary Table 4.** Characteristics of randomized controlled trials included in the meta-analysis to evaluate the effects of intermittent fasting

| Study                                       | Population | Nationality                | Duration of study | Control | Intervention | Follow-up loss rate (control:intervention) (%) | Subject number | Asian (%) | FPG (mg/dL) | TC (mg/dL) | TG (mg/dL) | LDL-C (mg/dL) | HDL-C (mg/dL) | BW (kg) | BMI (kg/m <sup>2</sup> ) | HbA1c (%) | SBP (mmHg) | DBP (mmHg) |
|---------------------------------------------|------------|----------------------------|-------------------|---------|--------------|------------------------------------------------|----------------|-----------|-------------|------------|------------|---------------|---------------|---------|--------------------------|-----------|------------|------------|
| Barnosky et al. (2017) <sup>62,63</sup>     | Ob         | US                         | 6 mo              | CER     | ADF          | 17.1:26.4                                      | 100            | 2         | 90.0        | 187.0      | 98.0       | 111.0         | 56.0          | 96.0    | 35.0                     | NA        | 123.0      | 81.0       |
| Bowen et al. (2018) <sup>64</sup>           | Ob         | Australia                  | 4 mo              | CER     | ADF          | 16.0:18.3                                      | 163            | 0         | 97.3        | 201.1      | 124.0      | 127.6         | 50.3          | 100.1   | 35.6                     | NA        | 120.0      | 75.2       |
| Carter et al. (2018, 2016) <sup>65,66</sup> | Ob         | Iran                       | 4 mo              | CER     | IER          | 7.5:5.0                                        | 75             | 100       | NA          | NA         | NA         | NA            | NA            | 88.3    | 31.3                     | NA        | 135.5      | 85.5       |
| Kunduraci et al. (2020) <sup>67</sup>       | Ob         | Turkey                     | 3 mo              | CER     | IER          | 5.7:8.6                                        | 65             | 100       | 117         | 228.5      | 204.8      | 147.7         | 44.6          | 92.9    | 34.7                     | 6.5       | 136.4      | 86.6       |
| Panizza et al. (2019) <sup>68</sup>         | Ob         | US (East Asians in Hawaii) | 3 mo              | DASH    | IER          | 7:13                                           | 60             | 100       | 103.3       | 243.5      | 133.7      | 183.6         | 35.1          | 80.2    | 30.7                     | NA        | 133.3      | 85.2       |

FPG, fasting plasma glucose; TC, total cholesterol; TG, triglyceride; LDL-C, low-density lipoprotein cholesterol; HDL-C, high-density lipoprotein cholesterol; BW, body weight; BMI, body mass index; HbA1c, glycosylated hemoglobin; SBP, systolic blood pressure; DBP, diastolic blood pressure; Ob, obesity or overweight; CER, continuous energy restriction; ADF, alternate-day fasting; IER, intermittent energy restriction; DASH, dietary approaches to stop hypertension diet; SD, standard diet; TRE, time-restricted eating; TZDM, type 2 diabetes.

**Supplementary Table 5.** Classification of carbohydrate-restricted diets

| Diet                                           | Carbohydrate composition                   |
|------------------------------------------------|--------------------------------------------|
| Normal carbohydrate diet (NCD)                 | > 45% of 2,000 kcal/day or > 225 g/day     |
| Carbohydrate-restricted diet                   |                                            |
| Moderately-low or low carbohydrate diet (mLCD) | 26%–45% of 2,000 kcal/day or 130–225 g/day |
| Moderately-low carbohydrate diet (MCD)         | 10%–25% of 2,000 kcal/day or 50–130 g/day  |
| Low carbohydrate diet (LCD)                    | < 10% of 2,000 kcal/day or < 50 g/day      |
| Very-low carbohydrate diet (VLCD)              |                                            |

**Supplementary Table 6.** Quality of the evidence assessment for included studies evaluating the effects of carbohydrate-restricted diets in adults with overweight/obesity: mLCD

| No. of studies                                                                | Design            | Risk of bias | Quality assessment       |                         |                        |                      | No. of patients |         | Effect            |                                          | Quality  |
|-------------------------------------------------------------------------------|-------------------|--------------|--------------------------|-------------------------|------------------------|----------------------|-----------------|---------|-------------------|------------------------------------------|----------|
|                                                                               |                   |              | Inconsistency            | Indirectness            | Imprecision            | Other considerations | mLCD            | Control | Relative (95% CI) | Absolute                                 |          |
| BW (kg, follow-up mean 8–24 wk; better indicated by lower values)             |                   |              |                          |                         |                        |                      |                 |         |                   |                                          |          |
| 24                                                                            | Randomized trials | Serious      | No serious inconsistency | No serious indirectness | No serious imprecision | Reporting bias       | 1,826           | 1,834   | -                 | MD, 1.03 lower (1.68–0.39 lower)         | Low      |
| BMI (follow-up 8–24 wk; better indicated by lower values)                     |                   |              |                          |                         |                        |                      |                 |         |                   |                                          |          |
| 15                                                                            | Randomized trials | Serious      | No serious inconsistency | No serious indirectness | Serious                | Reporting bias       | 1,360           | 1,390   | -                 | MD, 0.23 lower (0.46 lower–0.00 higher)  | Very low |
| WC (cm, follow-up 12–24 wk; better indicated by lower values)                 |                   |              |                          |                         |                        |                      |                 |         |                   |                                          |          |
| 15                                                                            | Randomized trials | Serious      | No serious inconsistency | No serious indirectness | No serious imprecision | None                 | 1,281           | 1,059   | -                 | MD, 0.65 lower (1.16–0.14 lower)         | Moderate |
| Fat mass (kg; better indicated by lower values)                               |                   |              |                          |                         |                        |                      |                 |         |                   |                                          |          |
| 14                                                                            | Randomized trials | Serious      | No serious inconsistency | No serious indirectness | No serious imprecision | None                 | 1,059           | 1,021   | -                 | MD, 0.44 lower (0.83–0.04 lower)         | Moderate |
| Fat free mass (kg, follow-up 12–24 wk; better indicated by higher values)     |                   |              |                          |                         |                        |                      |                 |         |                   |                                          |          |
| 10                                                                            | Randomized trials | Serious      | No serious inconsistency | No serious indirectness | Serious                | None                 | 585             | 554     | -                 | MD, 0.17 lower (0.49 lower–0.14 higher)  | Low      |
| Fat mass (%; follow-up 12–24 wk; better indicated by lower values)            |                   |              |                          |                         |                        |                      |                 |         |                   |                                          |          |
| 4                                                                             | Randomized trials | Serious      | No serious inconsistency | No serious indirectness | Serious                | None                 | 184             | 261     | -                 | MD, 0.09 higher (0.45 lower–0.64 higher) | Low      |
| SBP (mmHg, follow-up 8–24 wk; better indicated by lower values)               |                   |              |                          |                         |                        |                      |                 |         |                   |                                          |          |
| 19                                                                            | Randomized trials | Serious      | No serious inconsistency | No serious indirectness | Serious                | None                 | 1,290           | 1,322   | -                 | MD, 0.56 lower (1.69 lower–0.56 higher)  | Low      |
| DBP (mmHg, follow-up 8–24 wk; better indicated by lower values)               |                   |              |                          |                         |                        |                      |                 |         |                   |                                          |          |
| 19                                                                            | Randomized trials | Serious      | No serious inconsistency | No serious indirectness | Serious                | None                 | 1,294           | 1,321   | -                 | MD, 0.69 lower (1.39 lower–0.01 higher)  | Low      |
| TG (mg/dL, follow-up 8–24 wk; better indicated by lower values)               |                   |              |                          |                         |                        |                      |                 |         |                   |                                          |          |
| 24                                                                            | Randomized trials | Serious      | No serious inconsistency | No serious indirectness | No serious imprecision | Reporting bias       | 1,437           | 1,459   | -                 | MD, 13.76 lower (19.78–7.74 lower)       | Low      |
| LDL-C (mg/dL, follow-up 12–24 wk; better indicated by lower values)           |                   |              |                          |                         |                        |                      |                 |         |                   |                                          |          |
| 21                                                                            | Randomized trials | Serious      | Serious                  | No serious indirectness | Serious                | None                 | 1,345           | 1,376   | -                 | MD, 2.29 higher (0.41 lower–4.99 higher) | Very low |
| HDL-C (mg/dL, follow-up 8–24 wk; better indicated by higher values)           |                   |              |                          |                         |                        |                      |                 |         |                   |                                          |          |
| 20                                                                            | Randomized trials | Serious      | No serious inconsistency | No serious indirectness | No serious imprecision | None                 | 1,211           | 1,237   | -                 | MD, 2.61 higher (1.34–3.88 higher)       | Moderate |
| HbA1c (%; follow-up 8–24 wk; better indicated by lower values)                |                   |              |                          |                         |                        |                      |                 |         |                   |                                          |          |
| 8                                                                             | Randomized trials | Serious      | No serious inconsistency | No serious indirectness | Serious                | None                 | 373             | 366     | -                 | MD, 0.20 lower (0.39–0.01 lower)         | Low      |
| Fasting insulin (µU/mL, follow-up 12–24 wk; better indicated by lower values) |                   |              |                          |                         |                        |                      |                 |         |                   |                                          |          |
| 13                                                                            | Randomized trials | Serious      | No serious inconsistency | No serious indirectness | No serious imprecision | None                 | 916             | 939     | -                 | MD, 0.94 lower (1.73–0.16 lower)         | Moderate |
| Fasting glucose (mg/dL, follow-up 8–24 wk; better indicated by lower values)  |                   |              |                          |                         |                        |                      |                 |         |                   |                                          |          |
| 17                                                                            | Randomized trials | Serious      | No serious inconsistency | No serious indirectness | Serious                | None                 | 1,060           | 1,083   | -                 | MD, 0.32 lower (1.23 lower–0.58 higher)  | Low      |
| CRP (mg/L, follow-up 8–24 wk; better indicated by lower values)               |                   |              |                          |                         |                        |                      |                 |         |                   |                                          |          |
| 11                                                                            | Randomized trials | Serious      | No serious inconsistency | No serious indirectness | No serious imprecision | Reporting bias       | 701             | 690     | -                 | MD, 0.34 lower (0.67–0.01 lower)         | Low      |
| Adiponectin (µg/mL, follow-up 8–24 wk; better indicated by lower values)      |                   |              |                          |                         |                        |                      |                 |         |                   |                                          |          |
| 8                                                                             | Randomized trials | Serious      | No serious inconsistency | No serious indirectness | No serious imprecision | None                 | 685             | 671     | -                 | MD, 0.45 higher (0.15–0.76 higher)       | Moderate |

mLCD, moderately-low or low carbohydrate diet; CI, confidence interval; BW, body weight; MD, mean difference; BMI, body mass index; WC, waist circumference; SBP, systolic blood pressure; DBP, diastolic blood pressure; TG, triglyceride; LDL-C, low-density lipoprotein cholesterol; HDL-C, high-density lipoprotein cholesterol; HbA1c, glycosylated hemoglobin; CRP, C-reactive protein.

**Supplementary Table 7.** Quality of the evidence assessment for included studies evaluating the effects of carbohydrate-restricted diets in adults with overweight/obesity: VLCD

| No of studies                                                                 | Design            | Risk of bias | Quality assessment       |                         |                        |                      | No. of patients |         | Effect            |                                            | Quality  |
|-------------------------------------------------------------------------------|-------------------|--------------|--------------------------|-------------------------|------------------------|----------------------|-----------------|---------|-------------------|--------------------------------------------|----------|
|                                                                               |                   |              | Inconsistency            | Indirectness            | Imprecision            | Other considerations | VLCD            | Control | Relative (95% CI) | Absolute                                   |          |
| BW (kg, follow-up 8–24 wk; better indicated by lower values)                  |                   |              |                          |                         |                        |                      |                 |         |                   |                                            |          |
| 14                                                                            | Randomized trials | Serious      | No serious inconsistency | No serious indirectness | No serious imprecision | None                 | 591             | 675     | -                 | MD, 3.67 lower (4.84–2.51 lower)           | Moderate |
| BMI (kg/m <sup>2</sup> , follow-up 8–24 wk; better indicated by lower values) |                   |              |                          |                         |                        |                      |                 |         |                   |                                            |          |
| 5                                                                             | Randomized trials | Serious      | No serious inconsistency | No serious indirectness | No serious imprecision | None                 | 160             | 228     | -                 | MD, 1.88 lower (3.11–0.65 lower)           | Moderate |
| WC (cm, copy, follow-up 8–24 wk; better indicated by lower values)            |                   |              |                          |                         |                        |                      |                 |         |                   |                                            |          |
| 2                                                                             | Randomized trials | Serious      | No serious inconsistency | No serious indirectness | Serious                | None                 | 120             | 113     | -                 | MD, 4.11 lower (8.70 lower–0.49 higher)    | Low      |
| Fat mass (kg, follow-up 8–24 wk; better indicated by lower values)            |                   |              |                          |                         |                        |                      |                 |         |                   |                                            |          |
| 3                                                                             | Randomized trials | Serious      | No serious inconsistency | No serious indirectness | Serious                | None                 | 85              | 83      | -                 | MD, 3.01 lower (6.29 lower–0.27 higher)    | Low      |
| Fat free mass (kg, follow-up 8–24 wk; better indicated by higher values)      |                   |              |                          |                         |                        |                      |                 |         |                   |                                            |          |
| 3                                                                             | Randomized trials | Serious      | No serious inconsistency | No serious indirectness | Serious                | None                 | 85              | 83      | -                 | MD, 1.05 lower (1.75–0.35 lower)           | Low      |
| Fat mass (% , follow-up 8–24 wk; better indicated by lower values)            |                   |              |                          |                         |                        |                      |                 |         |                   |                                            |          |
| 4                                                                             | Randomized trials | Serious      | No serious inconsistency | No serious indirectness | No serious imprecision | None                 | 219             | 296     | -                 | MD, 1.88 lower (2.87–0.89 lower)           | Moderate |
| SBP (mmHg, follow-up 8–24 wk; better indicated by lower values)               |                   |              |                          |                         |                        |                      |                 |         |                   |                                            |          |
| 9                                                                             | Randomized trials | Serious      | No serious inconsistency | No serious indirectness | No serious imprecision | None                 | 4               | 502     | -                 | MD, 1.97 lower (3.68–0.25 lower)           | Moderate |
| DBP (mmHg, follow-up 8–24 wk; better indicated by lower values)               |                   |              |                          |                         |                        |                      |                 |         |                   |                                            |          |
| 9                                                                             | Randomized trials | Serious      | No serious inconsistency | No serious indirectness | Serious                | None                 | 404             | 502     | -                 | MD, 0.68 lower (1.79 lower–0.44 higher)    | Low      |
| TG (mg/dL, follow-up 8–24 wk; better indicated by lower values)               |                   |              |                          |                         |                        |                      |                 |         |                   |                                            |          |
| 13                                                                            | Randomized trials | Serious      | No serious inconsistency | No serious indirectness | No serious imprecision | Reporting bias       | 488             | 571     | -                 | MD, 21.33 lower (30.46–12.21 lower)        | Low      |
| LDL-C (mg/dL, follow-up 8–24 wk; better indicated by lower values)            |                   |              |                          |                         |                        |                      |                 |         |                   |                                            |          |
| 12                                                                            | Randomized trials | Serious      | No serious inconsistency | No serious indirectness | No serious imprecision | None                 | 469             | 554     | -                 | MD, 7.52 higher (3.34–11.70 higher)        | Moderate |
| HDL-C (mg/dL, follow-up 8–24 wk; better indicated by higher values)           |                   |              |                          |                         |                        |                      |                 |         |                   |                                            |          |
| 13                                                                            | Randomized trials | Serious      | Serious                  | No serious indirectness | No serious imprecision | None                 | 488             | 570     | -                 | MD, 30 higher (1.79–6.82 higher)           | Low      |
| HbA1c (% , follow-up 8–24 wk; better indicated by lower values)               |                   |              |                          |                         |                        |                      |                 |         |                   |                                            |          |
| 6                                                                             | Randomized trials | Serious      | No serious inconsistency | No serious indirectness | Serious                | None                 | 179             | 175     | -                 | MD, 0.23048 lower (2.87 lower–0.01 higher) | Low      |
| Fasting insulin (μU/mL, follow-up 8–24 wk; better indicated by lower values)  |                   |              |                          |                         |                        |                      |                 |         |                   |                                            |          |
| 6                                                                             | Randomized trials | Serious      | No serious inconsistency | No serious indirectness | Serious                | None                 | 255             | 348     | -                 | MD, 1.37 lower (2.89 lower–0.15 higher)    | Low      |
| Fasting glucose (mg/dL, follow-up 8–24 wk; better indicated by lower values)  |                   |              |                          |                         |                        |                      |                 |         |                   |                                            |          |
| 9                                                                             | Randomized trials | Serious      | No serious inconsistency | No serious indirectness | Serious                | None                 | 382             | 348     | -                 | MD, 0.44 lower (2.66 lower–1.78 higher)    | Low      |
| CRP (mg/L, follow-up 8–24 wk; better indicated by lower values)               |                   |              |                          |                         |                        |                      |                 |         |                   |                                            |          |
| 5                                                                             | Randomized trials | Serious      | No serious inconsistency | No serious indirectness | Serious                | None                 | 178             | 193     | -                 | MD, 0.63 lower (1.41 lower–0.15 higher)    | Low      |
| Adiponectin (μg/mL, follow-up 8–24 wk; better indicated by higher values)     |                   |              |                          |                         |                        |                      |                 |         |                   |                                            |          |
| 2                                                                             | Randomized trials | Serious      | No serious inconsistency | No serious indirectness | Serious                | None                 | 93              | 88      | -                 | MD, 0.75 higher (0.29–1.21 higher)         | Low      |

VLCD, very-low carbohydrate diet; CI, confidence interval; BW, body weight; MD, mean difference; BMI, body mass index; WC, waist circumference; SBP, systolic blood pressure; DBP, diastolic blood pressure; TG, triglyceride; LDL-C, low-density lipoprotein cholesterol; HDL-C, high-density lipoprotein cholesterol; HbA1c, glycosylated hemoglobin; CRP, C-reactive protein.

**Supplementary Table 8.** Quality of the evidence assessment for included studies evaluating the effects of IF in adults with overweight/obesity

| No. of studies                                                                 | Quality assessment |                         |                          |              |             |                      | No. of patients |         | Effect            |                                           | Quality  |
|--------------------------------------------------------------------------------|--------------------|-------------------------|--------------------------|--------------|-------------|----------------------|-----------------|---------|-------------------|-------------------------------------------|----------|
|                                                                                | Design             | Risk of bias            | Inconsistency            | Indirectness | Imprecision | Other considerations | IF              | Control | Relative (95% CI) | Absolute                                  |          |
| HbA1c (follow-up 12–24 wk; better indicated by lower values)                   |                    |                         |                          |              |             |                      |                 |         |                   |                                           |          |
| 3                                                                              | Randomized trials  | Serious                 | No serious inconsistency | Serious      | Serious     | None                 | 88              | 85      | -                 | MD, 0.11 higher (0.04 lower–0.26 higher)  | Very low |
| Fasting glucose (mg/dL, follow-up 12–24 wk; better indicated by lower values)  |                    |                         |                          |              |             |                      |                 |         |                   |                                           |          |
| 5                                                                              | Randomized trials  | No serious risk of bias | No serious inconsistency | Serious      | Serious     | None                 | 179             | 180     | -                 | MD, 0.89 lower (4.3 lower–2.53 higher)    | Low      |
| Fasting insulin (μU/mL, follow-up 12–24 wk; better indicated by lower values)  |                    |                         |                          |              |             |                      |                 |         |                   |                                           |          |
| 4                                                                              | Randomized trials  | No serious risk of bias | No serious inconsistency | Serious      | Serious     | None                 | 154             | 160     | -                 | MD, 0.43 lower (1.99 lower–1.14 higher)   | Low      |
| BW (kg, follow-up 12–24 wk; better indicated by lower values)                  |                    |                         |                          |              |             |                      |                 |         |                   |                                           |          |
| 8                                                                              | Randomized trials  | Serious                 | No serious inconsistency | Serious      | Serious     | None                 | 274             | 280     | -                 | MD, 1.22 lower (3.49 lower–1.05 higher)   | Very low |
| HOMA-IR (follow-up 12–24 wk; better indicated by lower values)                 |                    |                         |                          |              |             |                      |                 |         |                   |                                           |          |
| 2                                                                              | Randomized trials  | Serious                 | No serious inconsistency | Serious      | Serious     | None                 | 57              | 62      | -                 | MD, 0.22 lower (1.48 lower–1.05 higher)   | Very low |
| BMI (kg/m <sup>2</sup> , follow-up 12–24 wk; better indicated by lower values) |                    |                         |                          |              |             |                      |                 |         |                   |                                           |          |
| 5                                                                              | Randomized trials  | No serious risk of bias | No serious inconsistency | Serious      | Serious     | None                 | 192             | 188     | -                 | MD, 0.49 lower (1.13 lower–0.14 higher)   | Very low |
| BW (kg, follow-up 12–24 wk; better indicated by lower values)                  |                    |                         |                          |              |             |                      |                 |         |                   |                                           |          |
| 8                                                                              | Randomized trials  | No serious risk of bias | No serious inconsistency | Serious      | Serious     | None                 | 274             | 280     | -                 | MD, 1.22 lower (3.49 lower–1.05 higher)   | Low      |
| WC (cm, follow-up 12–24 wk; better indicated by lower values)                  |                    |                         |                          |              |             |                      |                 |         |                   |                                           |          |
| 3                                                                              | Randomized trials  | Serious                 | No serious inconsistency | Serious      | Serious     | None                 | 93              | 87      | -                 | MD, 1.95 lower (4.09 lower–0.2 higher)    | Very low |
| SBP (mmHg, follow-up 12–24 wk; better indicated by lower values)               |                    |                         |                          |              |             |                      |                 |         |                   |                                           |          |
| 6                                                                              | Randomized trials  | No serious risk of bias | Serious                  | Serious      | Serious     | None                 | 203             | 201     | -                 | MD, 0.87 higher (2.56 lower–4.39 higher)  | Very low |
| DBP (mmHg, follow-up 12–24 wk; better indicated by lower values)               |                    |                         |                          |              |             |                      |                 |         |                   |                                           |          |
| 6                                                                              | Randomized trials  | No serious risk of bias | Serious                  | Serious      | Serious     | None                 | 203             | 201     | -                 | MD, 0.16 lower (2.89 lower–2.55 higher)   | Very low |
| Fat free mass (kg, follow-up 12–24 wk; better indicated by lower values)       |                    |                         |                          |              |             |                      |                 |         |                   |                                           |          |
| 8                                                                              | Randomized trials  | Serious                 | No serious inconsistency | Serious      | Serious     | None                 | 269             | 271     | -                 | MD, 0.36 lower (0.87 lower–0.16 higher)   | Very low |
| Fat mass (kg, follow-up 12–24 wk; better indicated by lower values)            |                    |                         |                          |              |             |                      |                 |         |                   |                                           |          |
| 8                                                                              | Randomized trials  | Serious                 | No serious inconsistency | Serious      | Serious     | None                 | 269             | 271     | -                 | MD, 0.67 lower (1.95 lower–0.62 higher)   | Very low |
| Fat mass (% , follow-up 12–24 wk; better indicated by lower values)            |                    |                         |                          |              |             |                      |                 |         |                   |                                           |          |
| 3                                                                              | Randomized trials  | Serious                 | No serious inconsistency | Serious      | Serious     | None                 | 73              | 69      | -                 | MD, 0.27 higher (0.48 lower–1.01 higher)  | Very low |
| HDL-C (mg/dL, follow-up 12–24 wk; better indicated by higher values)           |                    |                         |                          |              |             |                      |                 |         |                   |                                           |          |
| 6                                                                              | Randomized trials  | Serious                 | No serious inconsistency | Serious      | Serious     | None                 | 218             | 214     | -                 | MD, 0.17 lower (3.27 lower–2.89 higher)   | Very low |
| LDL-C (mg/dL, follow-up 12–24 wk; better indicated by lower values)            |                    |                         |                          |              |             |                      |                 |         |                   |                                           |          |
| 5                                                                              | Randomized trials  | Serious                 | No serious inconsistency | Serious      | Serious     | None                 | 193             | 194     | -                 | MD, 0.24 lower (5.08 lower–4.59 higher)   | Very low |
| TG (mg/dL, follow-up 12–24 wk; better indicated by lower values)               |                    |                         |                          |              |             |                      |                 |         |                   |                                           |          |
| 6                                                                              | Randomized trials  | Serious                 | No serious inconsistency | Serious      | Serious     | None                 | 218             | 214     | -                 | MD, 1.51 lower (17.06 lower–14.04 higher) | Very low |
| HbA1c (Copy; follow-up 12–24 wk; better indicated by lower values)             |                    |                         |                          |              |             |                      |                 |         |                   |                                           |          |
| 3                                                                              | Randomized trials  | Serious                 | No serious inconsistency | Serious      | Serious     | None                 | 88              | 85      | -                 | MD, 0.11 higher (0.04 lower–0.26 higher)  | Very low |
| BW (kg, Copy; follow-up 12–24 wk; better indicated by lower values)            |                    |                         |                          |              |             |                      |                 |         |                   |                                           |          |
| 8                                                                              | Randomized trials  | Serious                 | No serious inconsistency | Serious      | Serious     | None                 | 274             | 280     | -                 | MD, 1.22 lower (3.49 lower–1.05 higher)   | Very low |

IF, intermittent fasting; CI, confidence interval; HbA1c, glycosylated hemoglobin; MD, mean difference; BW, body weight; HOMA-IR, homeostatic model assessment for insulin resistance; BMI, body mass index; WC, waist circumference; SBP, systolic blood pressure; DBP, diastolic blood pressure; HDL-C, high-density lipoprotein cholesterol; LDL-C, low-density lipoprotein cholesterol; TG, triglyceride.

**Supplementary Table 9.** Quality of the evidence assessment for included studies evaluating the effects of carbohydrate-restricted diets in adults with diabetes: mLCD

| No. of studies                                                        | Design            | Risk of bias | Quality assessment       |                         |                        |                      | No. of patients |         | Effect            |                                             | Quality  |
|-----------------------------------------------------------------------|-------------------|--------------|--------------------------|-------------------------|------------------------|----------------------|-----------------|---------|-------------------|---------------------------------------------|----------|
|                                                                       |                   |              | Inconsistency            | Indirectness            | Imprecision            | Other considerations | mLCD            | Control | Relative (95% CI) | Absolute                                    |          |
| HbA1c (follow-up 8–24 wk; better indicated by lower values)           |                   |              |                          |                         |                        |                      |                 |         |                   |                                             |          |
| 10                                                                    | Randomized trials | Serious      | No serious inconsistency | No serious indirectness | No serious imprecision | None                 | 383             | 375     | -                 | MD, 0.21 lower (0.32–0.10 lower)            | Moderate |
| HOMA-IR (follow-up 8–24 wk; better indicated by lower values)         |                   |              |                          |                         |                        |                      |                 |         |                   |                                             |          |
| 10                                                                    | Randomized trials | Serious      | No serious inconsistency | Serious                 | Serious                | Reporting bias       | 128             | 120     | -                 | MD, 0.53 lower (0.96–0.11 lower)            | Very low |
| Fasting glucose (follow-up 8–24 wk; better indicated by lower values) |                   |              |                          |                         |                        |                      |                 |         |                   |                                             |          |
| 6                                                                     | Randomized trials | Serious      | No serious inconsistency | No serious indirectness | Serious                | None                 | 172             | 165     | -                 | MD, 9.88 lower (18.04–1.71 lower)           | Low      |
| Fasting insulin (follow-up 8–24 wk; better indicated by lower values) |                   |              |                          |                         |                        |                      |                 |         |                   |                                             |          |
| 3                                                                     | Randomized trials | Serious      | No serious inconsistency | No serious indirectness | Serious                | None                 | 128             | 120     | -                 | MD, 2.11 lower (3.70–0.52 lower)            | Low      |
| BW (follow-up 8–24 wk; better indicated by lower values)              |                   |              |                          |                         |                        |                      |                 |         |                   |                                             |          |
| 8                                                                     | Randomized trials | Serious      | No serious inconsistency | No serious indirectness | Serious                | None                 | 320             | 299     | -                 | MD, 1.54 lower (3.11 lower–0.02 higher)     | Low      |
| SBP (mmHg, follow-up 8–24 wk; better indicated by lower values)       |                   |              |                          |                         |                        |                      |                 |         |                   |                                             |          |
| 6                                                                     | Randomized trials | Serious      | No serious inconsistency | No serious indirectness | No serious imprecision | None                 | 262             | 248     | -                 | MD, 2.99 lower (5.48–0.49 lower)            | Moderate |
| DBP (mmHg, follow-up 8–24 wk; better indicated by lower values)       |                   |              |                          |                         |                        |                      |                 |         |                   |                                             |          |
| 6                                                                     | Randomized trials | Serious      | No serious inconsistency | No serious indirectness | Serious                | None                 | 266             | 247     | -                 | MD, 1.07 lower (2.43 lower–0.29 higher)     | Low      |
| TG (mg/dL, follow-up 8–24 wk; better indicated by lower values)       |                   |              |                          |                         |                        |                      |                 |         |                   |                                             |          |
| 10                                                                    | Randomized trials | Serious      | No serious inconsistency | No serious indirectness | No serious imprecision | Reporting bias       | 380             | 362     | -                 | MD, 17.22 lower (34.27–0.18 lower)          | Low      |
| LDL-C (mg/dL, follow-up 8–24 wk; better indicated by lower values)    |                   |              |                          |                         |                        |                      |                 |         |                   |                                             |          |
| 8                                                                     | Randomized trials | Serious      | No serious inconsistency | No serious indirectness | Serious                | None                 | 308             | 299     | -                 | MD, 0.35 higher (3.03 lower to 3.72 higher) | Low      |
| HDL-C (mg/dL, follow-up 8–24 wk; better indicated by lower values)    |                   |              |                          |                         |                        |                      |                 |         |                   |                                             |          |
| 8                                                                     | Randomized trials | Serious      | No serious inconsistency | No serious indirectness | No serious imprecision | None                 | 283             | 264     | -                 | MD, 2.30 higher (0.23–4.37 higher)          | Moderate |

mLCD, moderately-low or low carbohydrate diet; CI, confidence interval; HbA1c, glycosylated hemoglobin; MD, mean difference; HOMA-IR, homeostatic model assessment for insulin resistance; BW, body weight; SBP, systolic blood pressure; DBP, diastolic blood pressure; TG, triglyceride; LDL-C, low-density lipoprotein cholesterol; HDL-C, high-density lipoprotein cholesterol.



**Supplementary Table 10.** Quality of the evidence assessment for included studies evaluating the effects of carbohydrate-restricted diets in adults with diabetes: VLCD

| No. of studies                                                              | Design            | Risk of bias | Quality assessment       |                         |                        |                      |      | No. of patients |                   | Effect                                    |          | Quality |
|-----------------------------------------------------------------------------|-------------------|--------------|--------------------------|-------------------------|------------------------|----------------------|------|-----------------|-------------------|-------------------------------------------|----------|---------|
|                                                                             |                   |              | Inconsistency            | Indirectness            | Imprecision            | Other considerations | VLCD | Control         | Relative (95% CI) | Absolute                                  |          |         |
| HbA1c (follow-up mean 24 wk; better indicated by lower values)              |                   |              |                          |                         |                        |                      |      |                 |                   |                                           |          |         |
| 5                                                                           | Randomized trials | Serious      | No serious inconsistency | No serious indirectness | No serious imprecision | None                 | 161  | 160             | -                 | MD, 0.32 lower (0.57–0.06 lower)          | Moderate |         |
| HOMA-IR (follow-up mean 12–24 wk; better indicated by lower values)         |                   |              |                          |                         |                        |                      |      |                 |                   |                                           |          |         |
| 2                                                                           | Randomized trials | Serious      | No serious inconsistency | No serious indirectness | Serious                | None                 | 61   | 58              | -                 | MD, 1.07 lower (3.13 lower–0.98 higher)   | Low      |         |
| Fasting glucose (follow-up mean 12–24 wk; better indicated by lower values) |                   |              |                          |                         |                        |                      |      |                 |                   |                                           |          |         |
| 3                                                                           | Randomized trials | Serious      | No serious inconsistency | No serious indirectness | Serious                | None                 | 135  | 132             | -                 | MD, 9.64 lower (19.54 lower–0.26 higher)  | Low      |         |
| BW (follow-up mean 12–24 wk; better indicated by lower values)              |                   |              |                          |                         |                        |                      |      |                 |                   |                                           |          |         |
| 4                                                                           | Randomized trials | Serious      | No serious inconsistency | No serious indirectness | No serious imprecision | None                 | 147  | 144             | -                 | MD, 3.84 lower (7.55–0.13 lower)          | Moderate |         |
| Fasting insulin (better indicated by lower values)                          |                   |              |                          |                         |                        |                      |      |                 |                   |                                           |          |         |
| 1                                                                           | Randomized trials | Serious      | No serious inconsistency | No serious indirectness | Serious                | None                 | 16   | 18              | -                 | MD, 2.80 lower (5.84 lower–0.24 higher)   | Low      |         |
| SBP (mmHg; better indicated by lower values)                                |                   |              |                          |                         |                        |                      |      |                 |                   |                                           |          |         |
| 3                                                                           | Randomized trials | Serious      | No serious inconsistency | No serious indirectness | Serious                | None                 | 106  | 112             | -                 | MD, 0.34 higher (3.61 lower–4.28 higher)  | Low      |         |
| DBP (mmHg; better indicated by lower values)                                |                   |              |                          |                         |                        |                      |      |                 |                   |                                           |          |         |
| 3                                                                           | Randomized trials | Serious      | No serious inconsistency | No serious indirectness | Serious                | None                 | 106  | 112             | -                 | MD, 1.38 higher (0.90 lower–3.67 higher)  | Low      |         |
| TG (mg/dL, better indicated by lower values)                                |                   |              |                          |                         |                        |                      |      |                 |                   |                                           |          |         |
| 5                                                                           | Randomized trials | Serious      | No serious inconsistency | No serious indirectness | Serious                | None                 | 158  | 155             | -                 | MD, 11.40 lower (27.01 lower–4.22 higher) | Low      |         |
| LDL-C (mg/dL, better indicated by lower values)                             |                   |              |                          |                         |                        |                      |      |                 |                   |                                           |          |         |
| 4                                                                           | Randomized trials | Serious      | No serious inconsistency | No serious indirectness | No serious imprecision | None                 | 139  | 138             | -                 | MD, 7.19 higher (0.02–14.36 higher)       | Moderate |         |
| HDL-C (mg/dL, better indicated by lower values)                             |                   |              |                          |                         |                        |                      |      |                 |                   |                                           |          |         |
| 5                                                                           | Randomized trials | Serious      | No serious inconsistency | No serious indirectness | Serious                | None                 | 158  | 154             | -                 | MD, 0.43 higher (1.98 lower–2.84 higher)  | Low      |         |

VLCD, very-low carbohydrate diet; CI, confidence interval; HbA1c, glycosylated hemoglobin; MD, mean difference; HOMA-IR, homeostatic model assessment for insulin resistance; BW, body weight; SBP, systolic blood pressure; DBP, diastolic blood pressure; TG, triglyceride; LDL-C, low-density lipoprotein cholesterol; HDL-C, high-density lipoprotein cholesterol.

**Supplementary Table 11.** Quality of the evidence assessment for included studies evaluating the effects of carbohydrate-restricted diets in adults with hypertension: mLCD

| No. of studies                                                  | Design            | Quality assessment |                          |              |             |                      | No. of patients |         | Effect            |                                          | Quality  |
|-----------------------------------------------------------------|-------------------|--------------------|--------------------------|--------------|-------------|----------------------|-----------------|---------|-------------------|------------------------------------------|----------|
|                                                                 |                   | Risk of bias       | Inconsistency            | Indirectness | Imprecision | Other considerations | mLCD            | Control | Relative (95% CI) | Absolute                                 |          |
| SBP (mmHg, follow-up 8–24 wk; better indicated by lower values) |                   |                    |                          |              |             |                      |                 |         |                   |                                          |          |
| 2                                                               | Randomized trials | Serious            | No serious inconsistency | Serious      | Serious     | None                 | 97              | 98      | -                 | MD, 3.25 lower (7.28 lower–0.77 higher)  | Very low |
| DBP (mmHg, follow-up 8–24 wk; better indicated by lower values) |                   |                    |                          |              |             |                      |                 |         |                   |                                          |          |
| 1                                                               | Randomized trials | Serious            | No serious inconsistency | Serious      | Serious     | None                 | 46              | 47      | -                 | MD, 1.80 lower (4.56 lower–0.96 higher)  | Very low |
| LDL-C (follow-up 8–24 wk; better indicated by lower values)     |                   |                    |                          |              |             |                      |                 |         |                   |                                          |          |
| 1                                                               | Randomized trials | Serious            | No serious inconsistency | Serious      | Serious     | None                 | 46              | 47      | -                 | MD, 0.00 higher (9.55 lower–9.55 higher) | Very low |
| TG (follow-up 8–24 wk; better indicated by lower values)        |                   |                    |                          |              |             |                      |                 |         |                   |                                          |          |
| 2                                                               | Randomized trials | Serious            | No serious inconsistency | Serious      | Serious     | None                 | 97              | 98      | -                 | MD, 35.58 lower (52.84–18.33 lower)      | Very low |
| BW (kg, follow-up 8–24 wk; better indicated by lower values)    |                   |                    |                          |              |             |                      |                 |         |                   |                                          |          |
| 2                                                               | Randomized trials | Serious            | No serious inconsistency | Serious      | Serious     | None                 | 97              | 98      | -                 | MD, 1.81 lower (3.93 lower–0.30 higher)  | Very low |
| HDL-C (follow-up 36–52 wk; better indicated by higher values)   |                   |                    |                          |              |             |                      |                 |         |                   |                                          |          |
| 1                                                               | Randomized trials | Serious            | No serious inconsistency | Serious      | Serious     | None                 | 46              | 47      | -                 | MD, 1.60 higher (1.13 lower–4.33 higher) | Very low |
| FMD (follow-up 36–52 wk; better indicated by lower values)      |                   |                    |                          |              |             |                      |                 |         |                   |                                          |          |
| 1                                                               | Randomized trials | Serious            | No serious inconsistency | Serious      | Serious     | None                 | 46              | 47      | -                 | MD, 0.30 higher (0.58 lower–1.18 higher) | Very low |

mLCD, moderately-low or low carbohydrate diet; CI, confidence interval; SBP, systolic blood pressure; MD, mean difference; DBP, diastolic blood pressure; LDL-C, low-density lipoprotein cholesterol; TG, triglyceride; BW, body weight; HDL-C, high-density lipoprotein cholesterol; FMD, flow-mediated dilation.

**Supplementary Table 12.** Quality of the evidence assessment for included studies evaluating the effects of carbohydrate-restricted diets in adults with hypertension: VLCD

| No. of studies                                                  | Design            | Quality assessment |                          |              |             |      | Other considerations | No. of patients |                   | Effect                                     |          | Quality |
|-----------------------------------------------------------------|-------------------|--------------------|--------------------------|--------------|-------------|------|----------------------|-----------------|-------------------|--------------------------------------------|----------|---------|
|                                                                 |                   | Risk of bias       | Inconsistency            | Indirectness | Imprecision | VLCD |                      | Control         | Relative (95% CI) | Absolute                                   |          |         |
| SBP (mmHg, follow-up 8–24 wk; better indicated by lower values) |                   |                    |                          |              |             |      |                      |                 |                   |                                            |          |         |
| 2                                                               | Randomized trials | Serious            | No serious inconsistency | Serious      | Serious     | None | 115                  | 117             | -                 | MD, 1.34 lower (5.20 lower–2.51 higher)    | Very low |         |
| DBP (mmHg, follow-up 8–24 wk; better indicated by lower values) |                   |                    |                          |              |             |      |                      |                 |                   |                                            |          |         |
| 2                                                               | Randomized trials | Serious            | No serious inconsistency | Serious      | Serious     | None | 115                  | 117             | -                 | MD, 2.01 higher (0.61 lower–4.63 higher)   | Very low |         |
| LDL-C (follow-up 8–24 wk; better indicated by lower values)     |                   |                    |                          |              |             |      |                      |                 |                   |                                            |          |         |
| 2                                                               | Randomized trials | Serious            | Serious                  | Serious      | Serious     | None | 115                  | 117             | -                 | MD, 8.91 higher (9.27 lower–27.08 higher)  | Very low |         |
| TG (follow-up 8–24 wk; better indicated by lower values)        |                   |                    |                          |              |             |      |                      |                 |                   |                                            |          |         |
| 2                                                               | Randomized trials | Serious            | Serious                  | Serious      | Serious     | None | 115                  | 117             | -                 | MD, 10.17 lower (43.00 lower–22.67 higher) | Very low |         |
| BW (kg, follow-up 8–24 wk; better indicated by lower values)    |                   |                    |                          |              |             |      |                      |                 |                   |                                            |          |         |
| 2                                                               | Randomized trials | Serious            | No serious inconsistency | Serious      | Serious     | None | 115                  | 117             | -                 | MD, 1.16 lower (2.65 lower–0.34 higher)    | Very low |         |
| HDL-C (follow-up 8–24 wk; better indicated by higher values)    |                   |                    |                          |              |             |      |                      |                 |                   |                                            |          |         |
| 2                                                               | Randomized trials | Serious            | Serious                  | Serious      | Serious     | None | 115                  | 117             | -                 | MD, 1.85 higher (5.98 lower–9.69 higher)   | Very low |         |
| FMD (follow-up 36–52 wk; better indicated by lower values)      |                   |                    |                          |              |             |      |                      |                 |                   |                                            |          |         |
| 1                                                               | Randomized trials | Serious            | No serious inconsistency | Serious      | Serious     | None | 26                   | 23              | -                 | MD, 180 lower (3.48–0.12 lower)            | Very low |         |

VLCD, very-low carbohydrate diet; CI, confidence interval; SBP, systolic blood pressure; MD, mean difference; DBP, diastolic blood pressure; LDL-C, low-density lipoprotein cholesterol; TG, triglyceride; BW, body weight; HDL-C, high-density lipoprotein cholesterol; FMD, flow-mediated dilation.

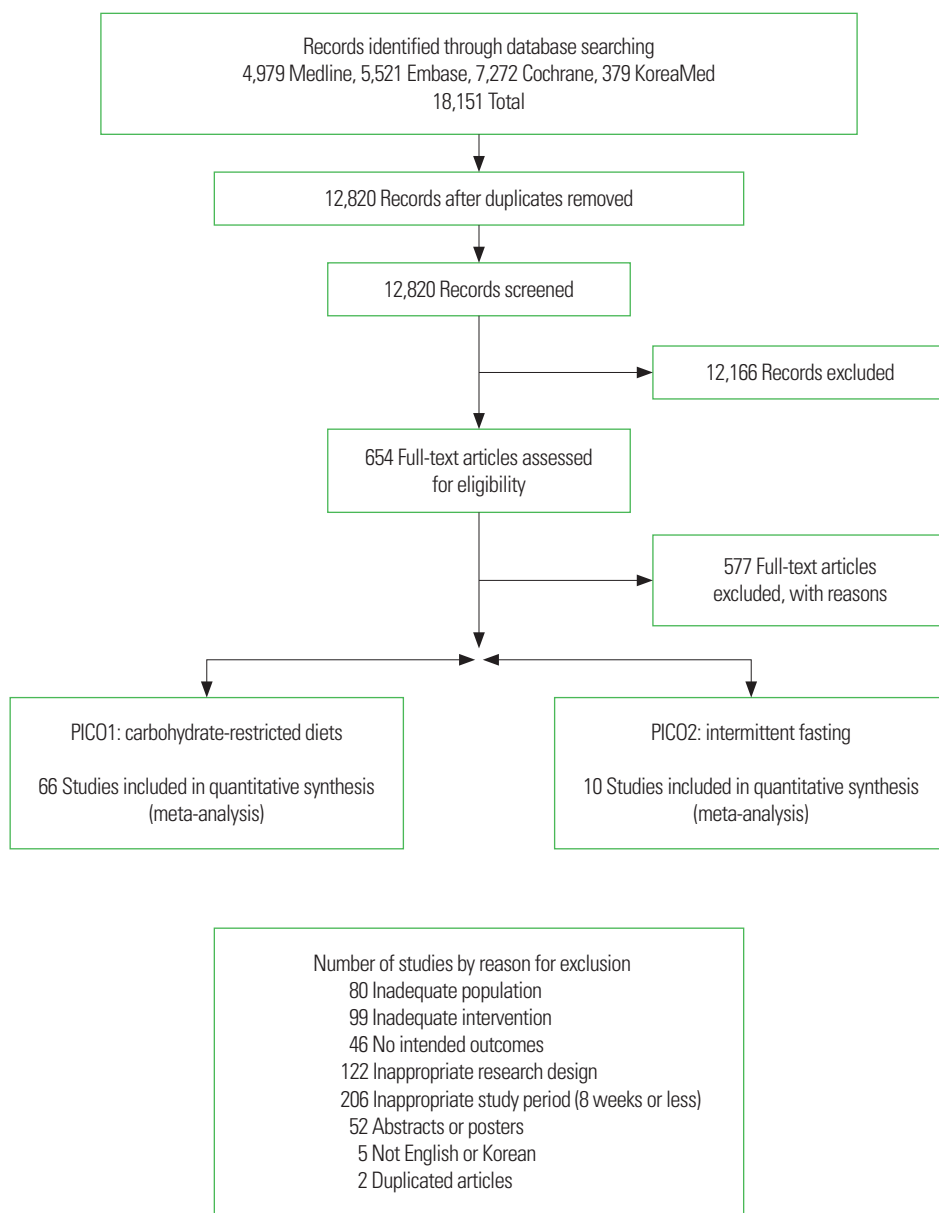

**Supplementary Figure 1.** Preferred reporting items for systematic reviews and meta-analyses (PRISMA) study flow for literature selection and exclusion process. PICO, population, intervention, comparator, outcome.

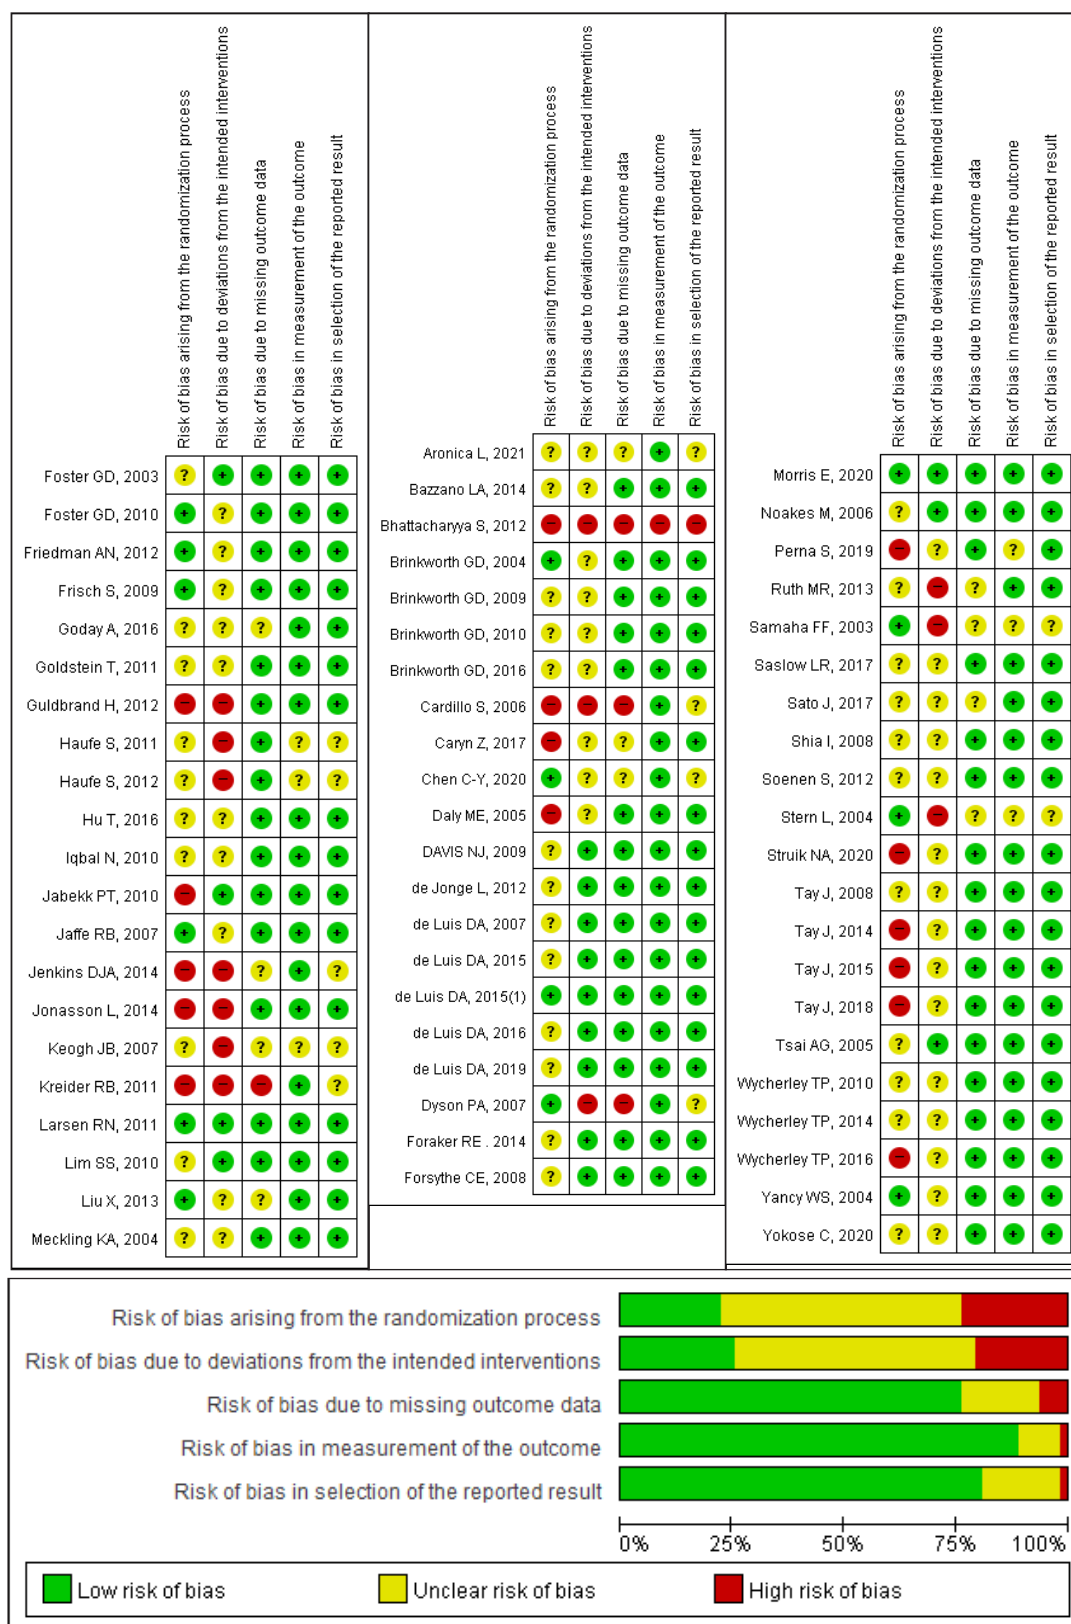

Supplementary Figure 2. Risk of bias assessment in studies evaluating the effects of carbohydrate-restricted diets in adults with overweight/obesity.

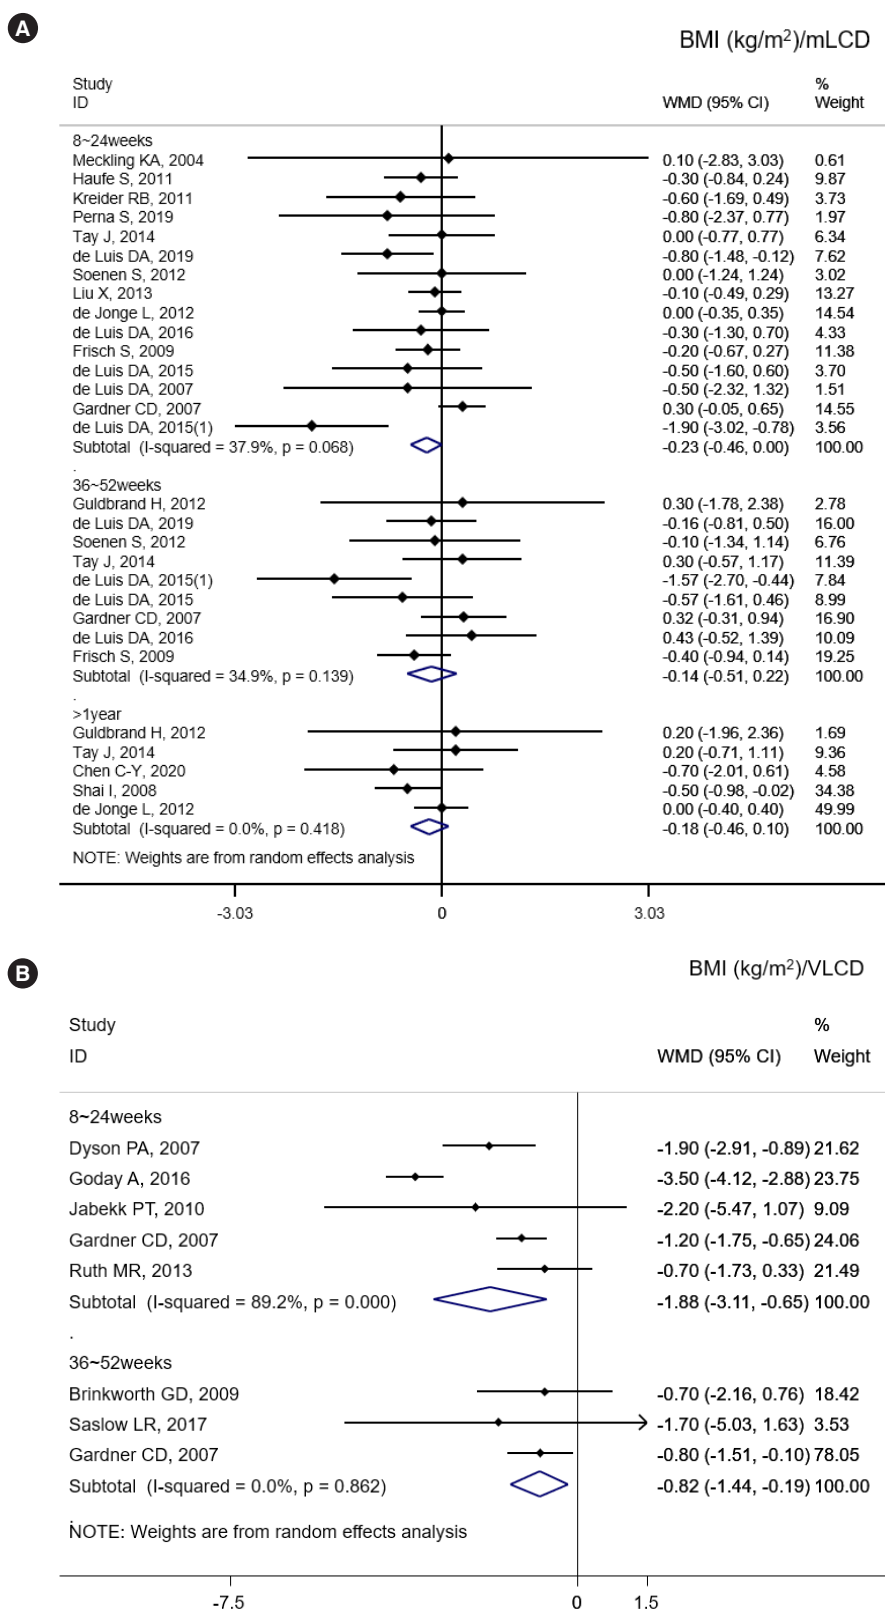

**Supplementary Figure 3.** Effects of carbohydrate-restricted diet on body mass index (BMI) in adults with overweight/obesity. (A) Moderately-low or low carbohydrate diet (mLCD). (B) Very-low carbohydrate diet (VLCD). WMD, weighted mean difference; CI, confidence interval.

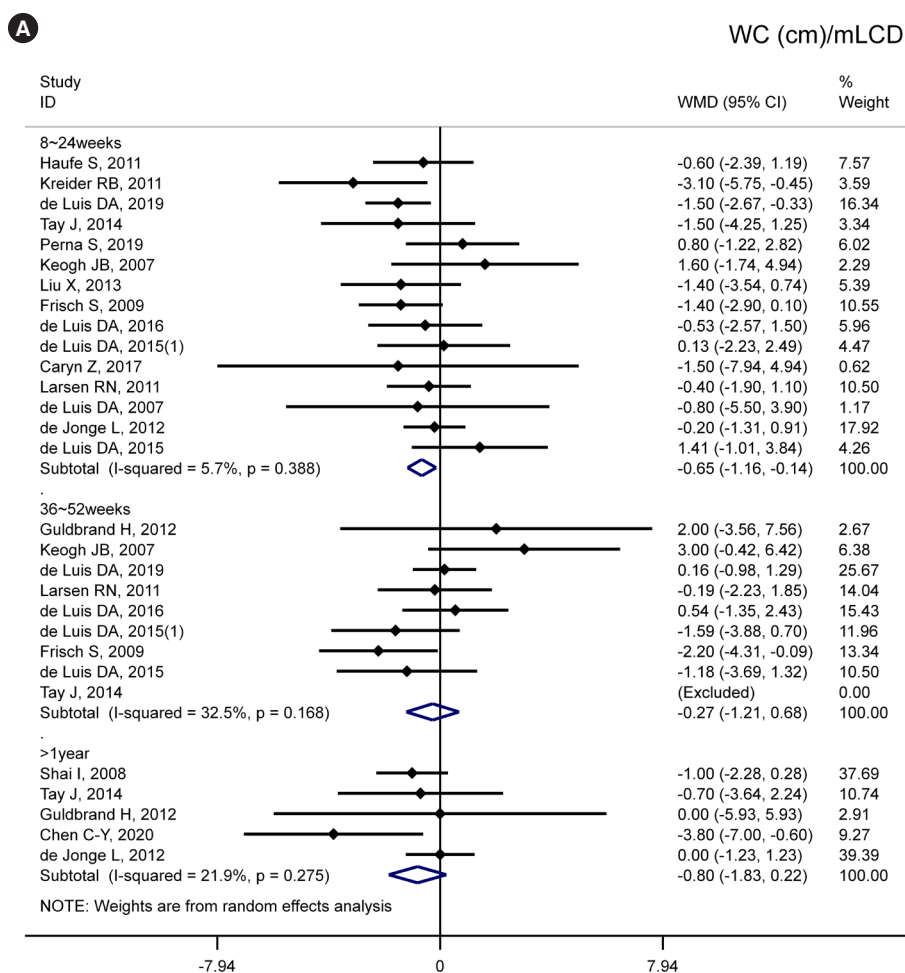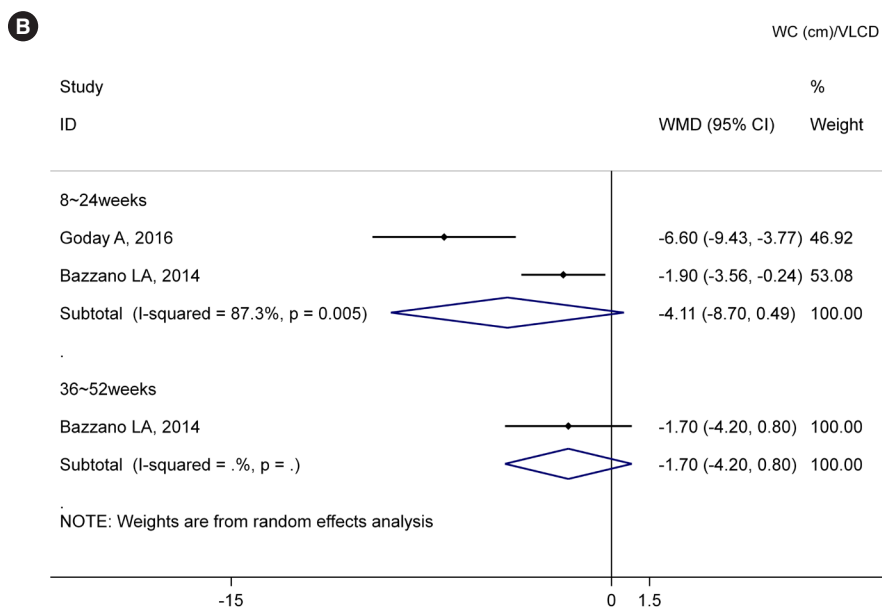

**Supplementary Figure 4.** Effects of carbohydrate-restricted diets on waist circumference (WC) in adults with overweight/obesity. (A) Moderately-low or low carbohydrate diet (mLCD). (B) Very-low carbohydrate diet (VLCD). WMD, weighted mean difference; CI, confidence interval.

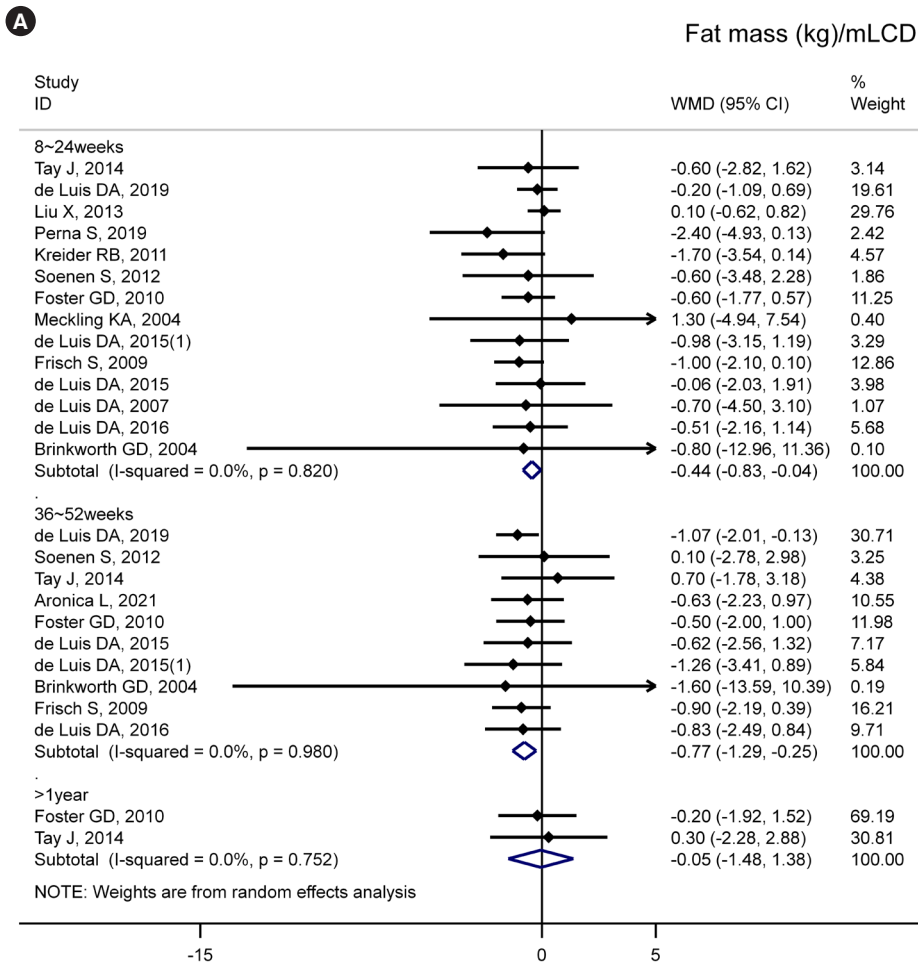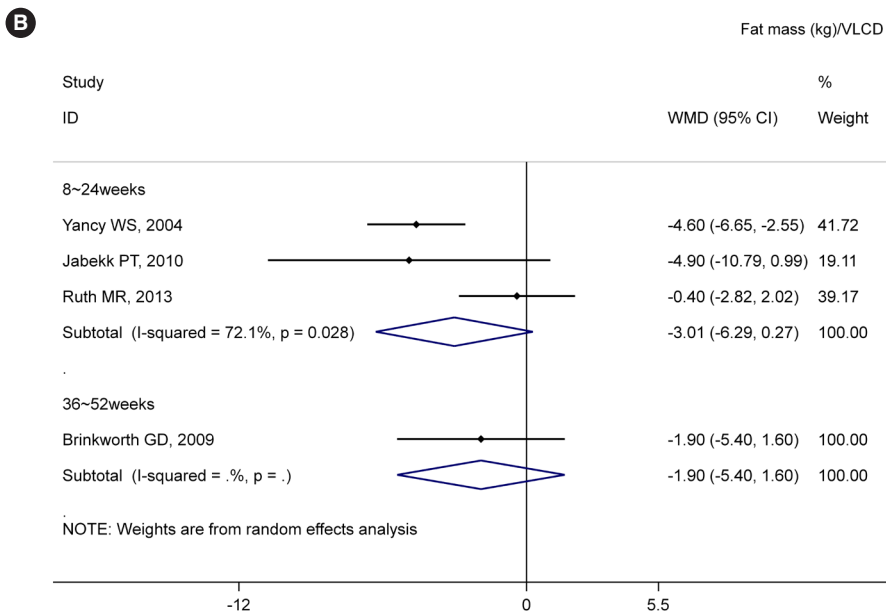

**Supplementary Figure 5.** Effects of carbohydrate-restricted diets on fat mass in adults with overweight/obesity. (A) Moderately-low or low carbohydrate diet (mLCD). (B) Very-low carbohydrate diet (VLCD). WMD, weighted mean difference; CI, confidence interval.



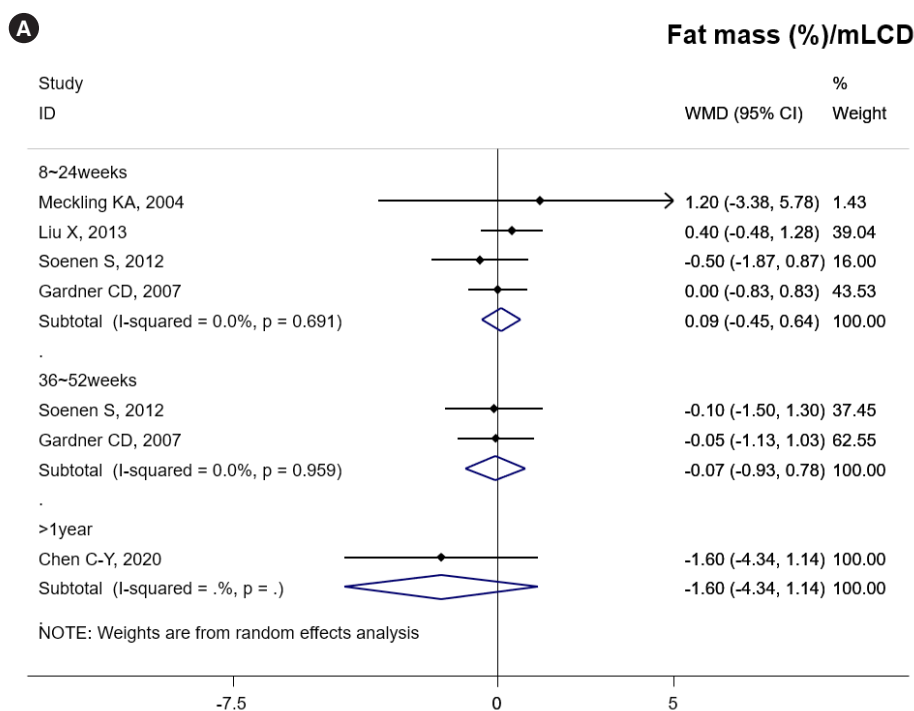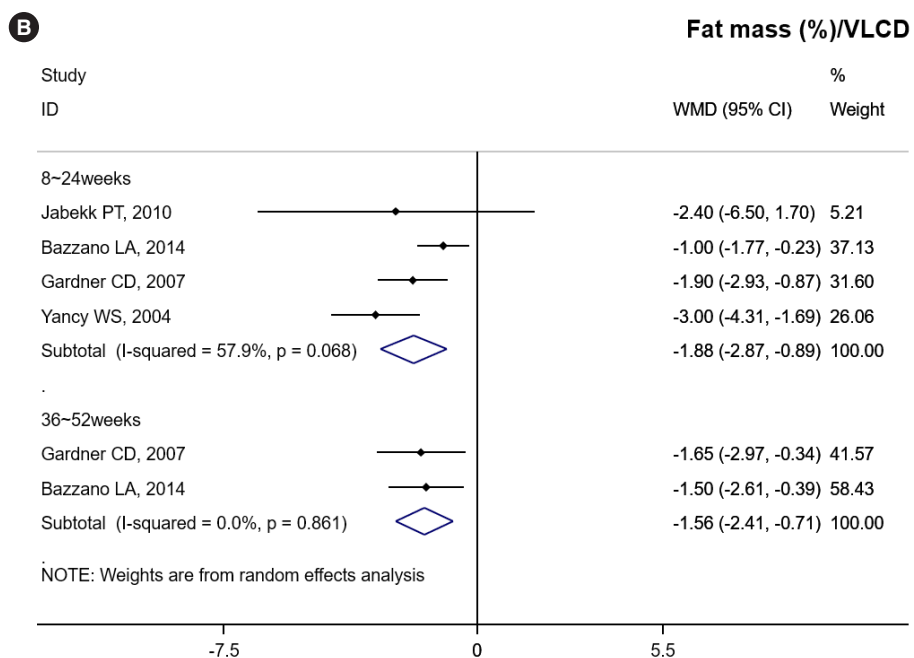

**Supplementary Figure 6.** Effects of carbohydrate-restricted diets on body fat percentage in adults with overweight/obesity. (A) Moderately-low or low carbohydrate diet (mLCD). (B) Very-low carbohydrate diet (VLCD). WMD, weighted mean difference; CI, confidence interval.

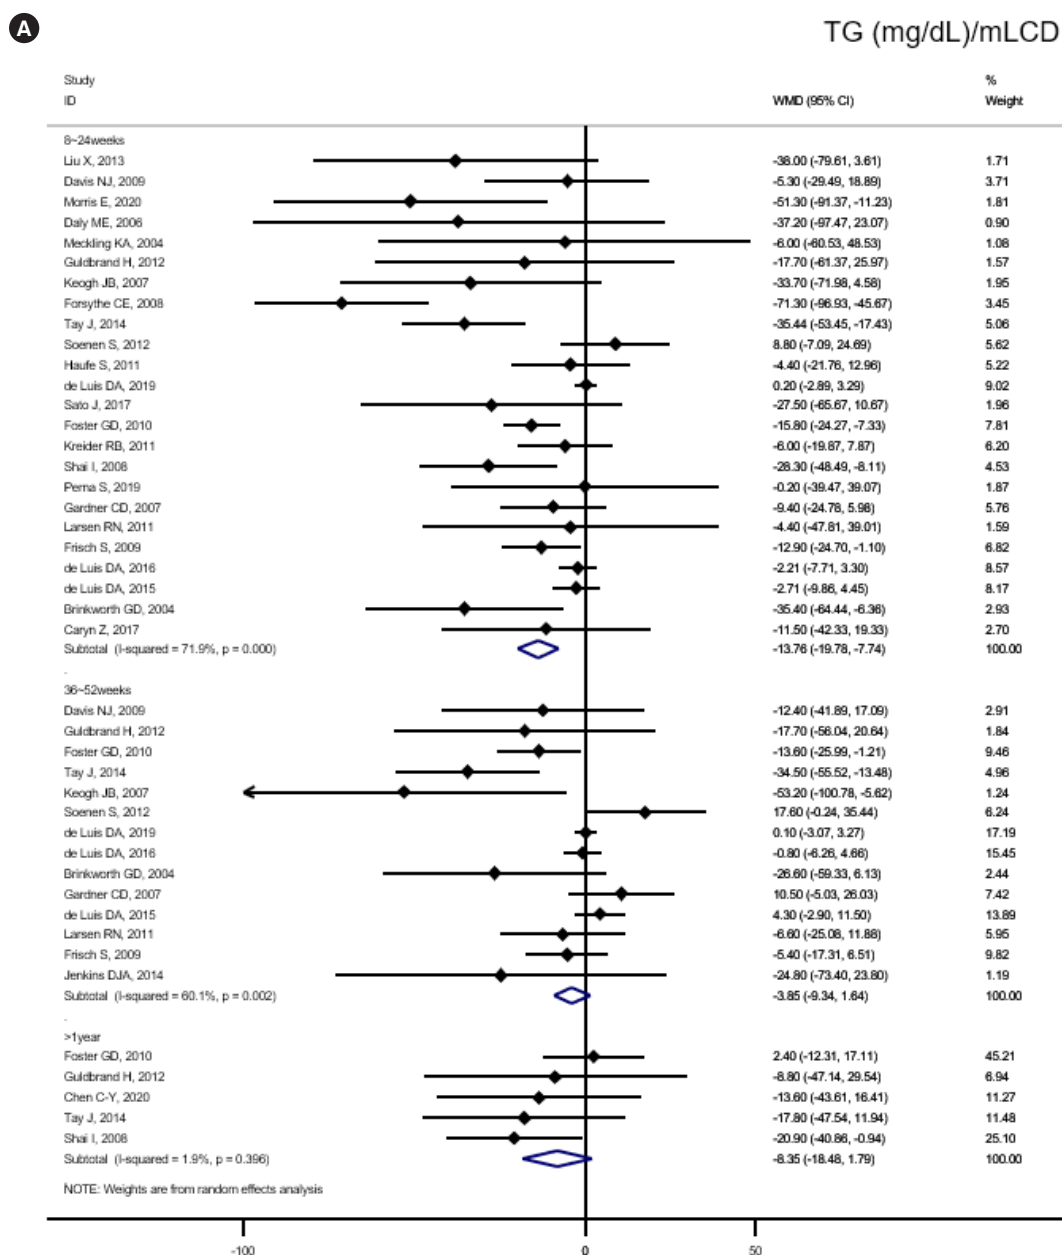

**Supplementary Figure 7.** Effects of carbohydrate-restricted diets on serum lipid profile in adults with overweight/obesity. (A) Moderately-low or low carbohydrate diet (mLCD) on triglycerides (TG). *(Continued to the next page)*

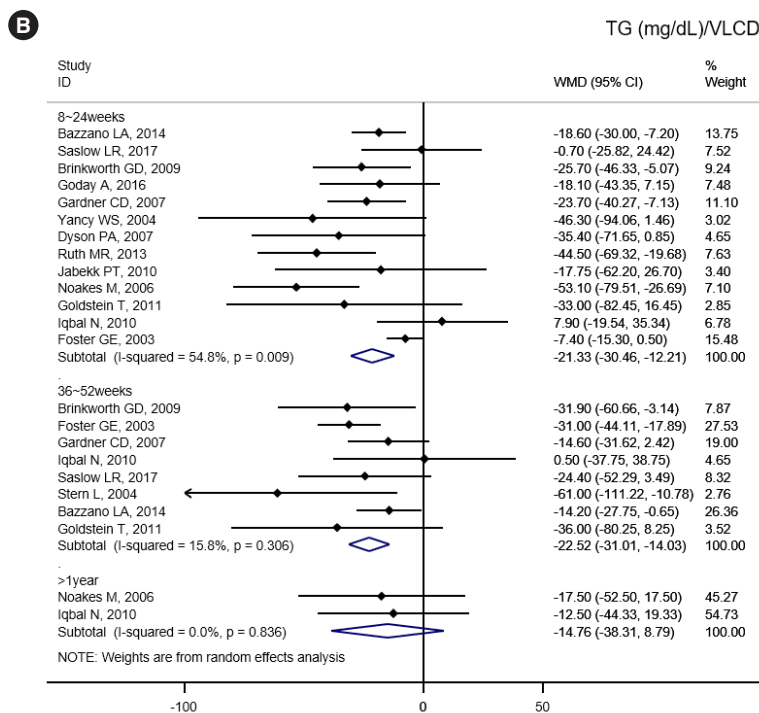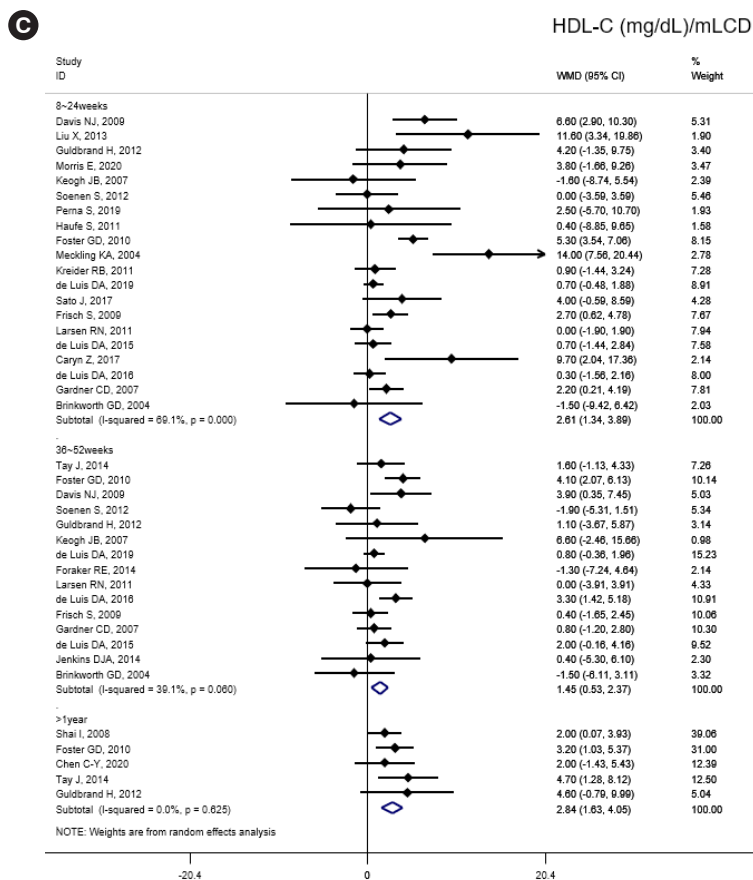

Supplementary Figure 7. (Continued) (B) Very-low carbohydrate diet (VLCD) on TG. (C) mLCD on high-density lipoprotein cholesterol (HDL-C).

(Continued to the next page)

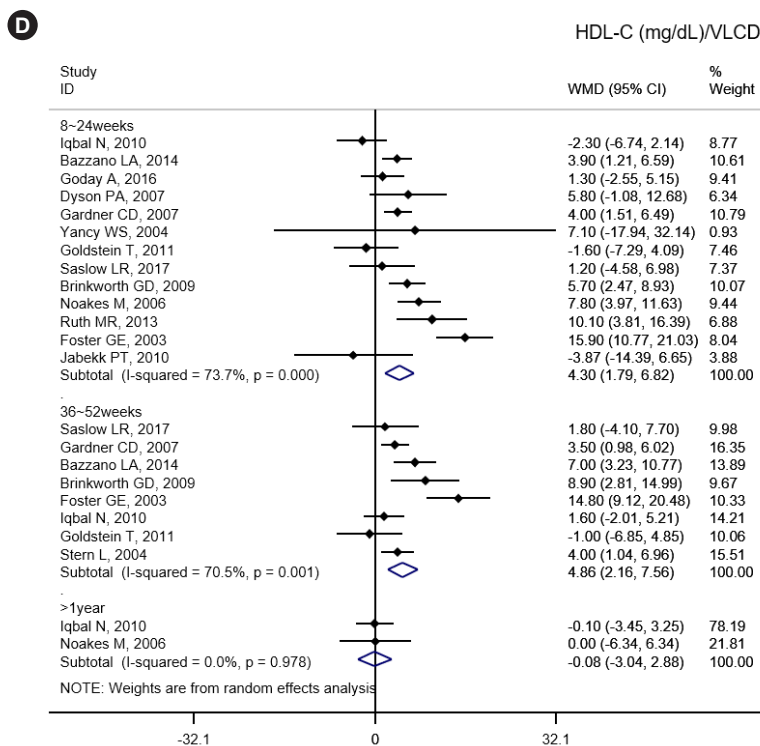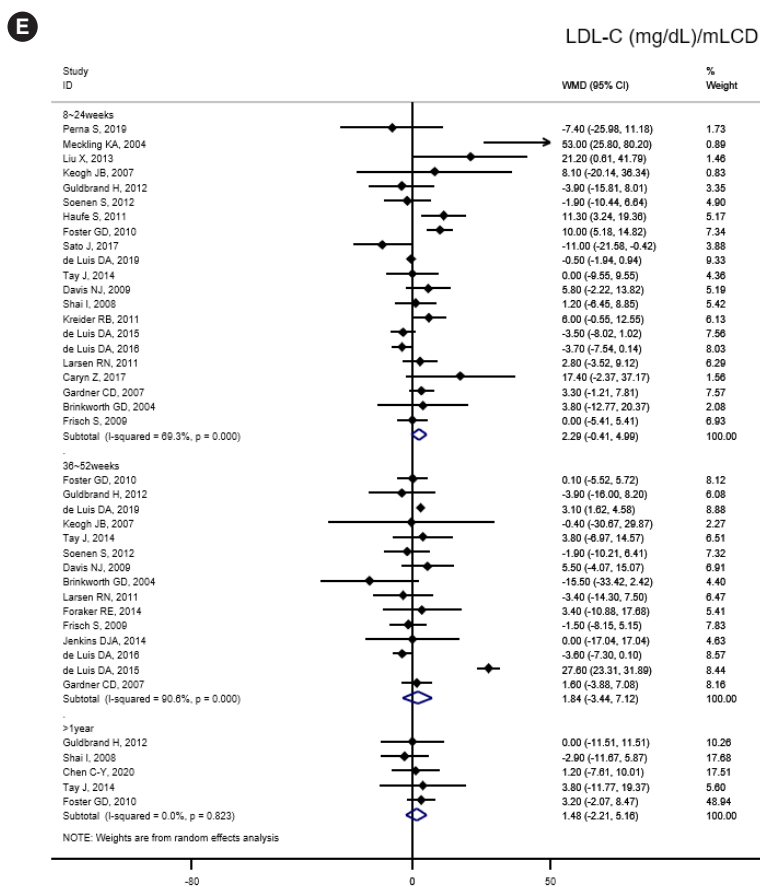

Supplementary Figure 7. (Continued) (D) VLCD on HDL-C. (E) mLCD on low-density lipoprotein cholesterol (LDL-C).

(Continued to the next page)

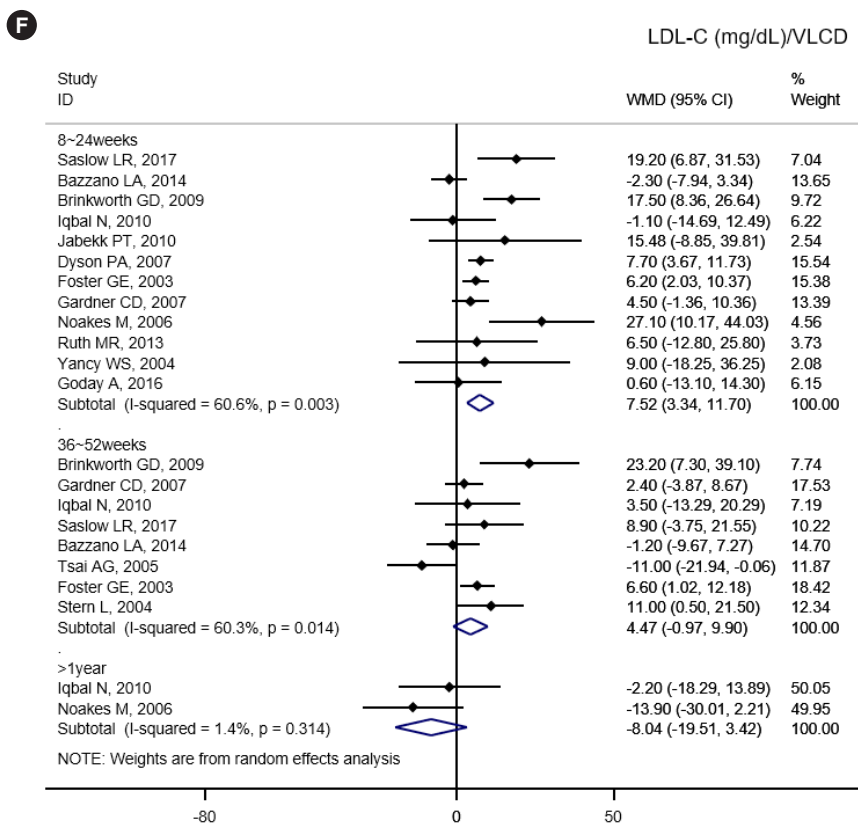

Supplementary Figure 7. (Continued) (F) VLCD on LDL-C. WMD, weighted mean difference; CI, confidence interval.

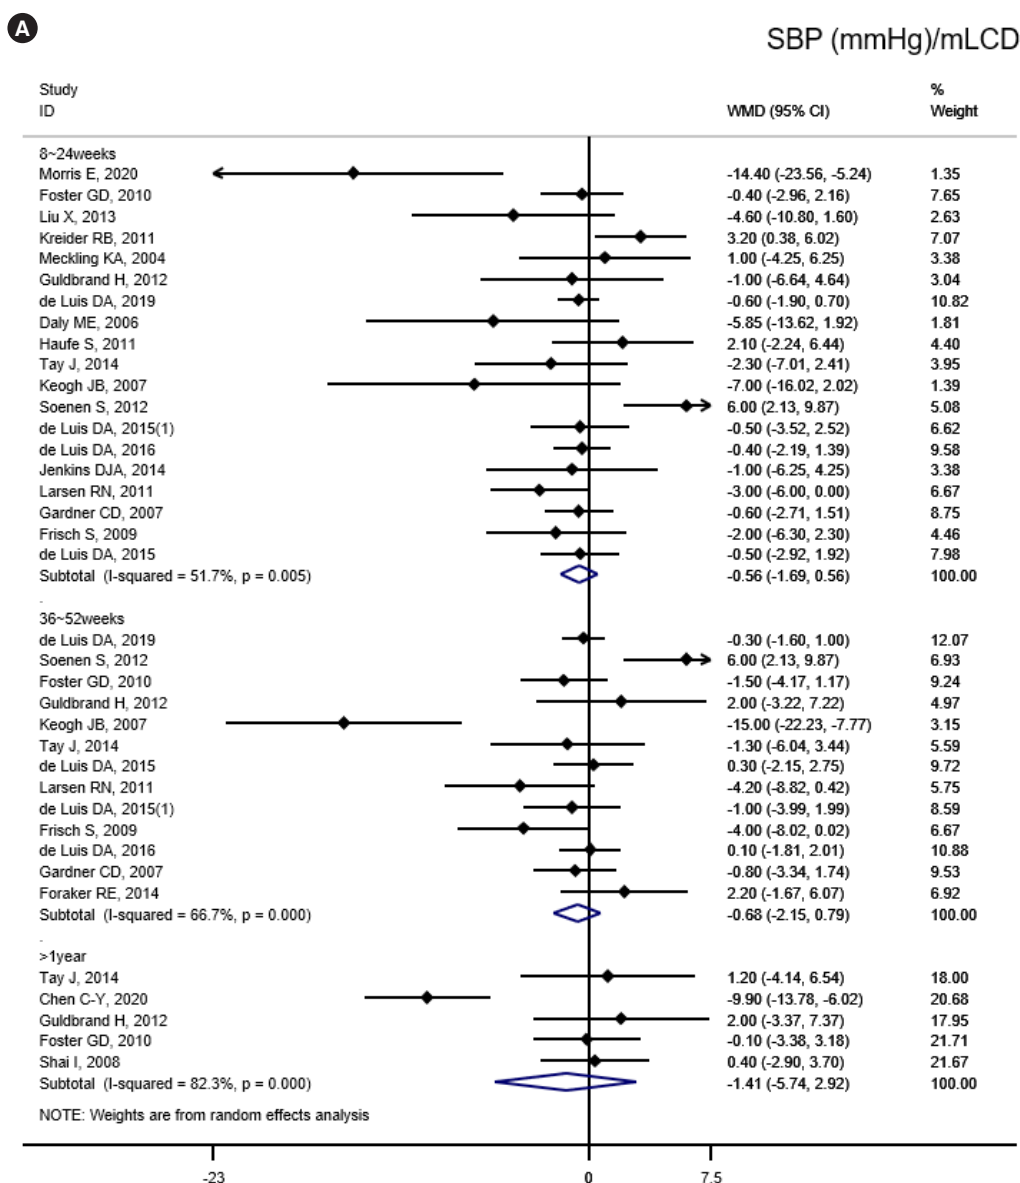

**Supplementary Figure 8.** Effects of carbohydrate-restricted diets on blood pressure in adults with overweight/obesity. (A) Moderately-low or low carbohydrate diet (mLCD) on systolic blood pressure (SBP). (Continued to the next page)

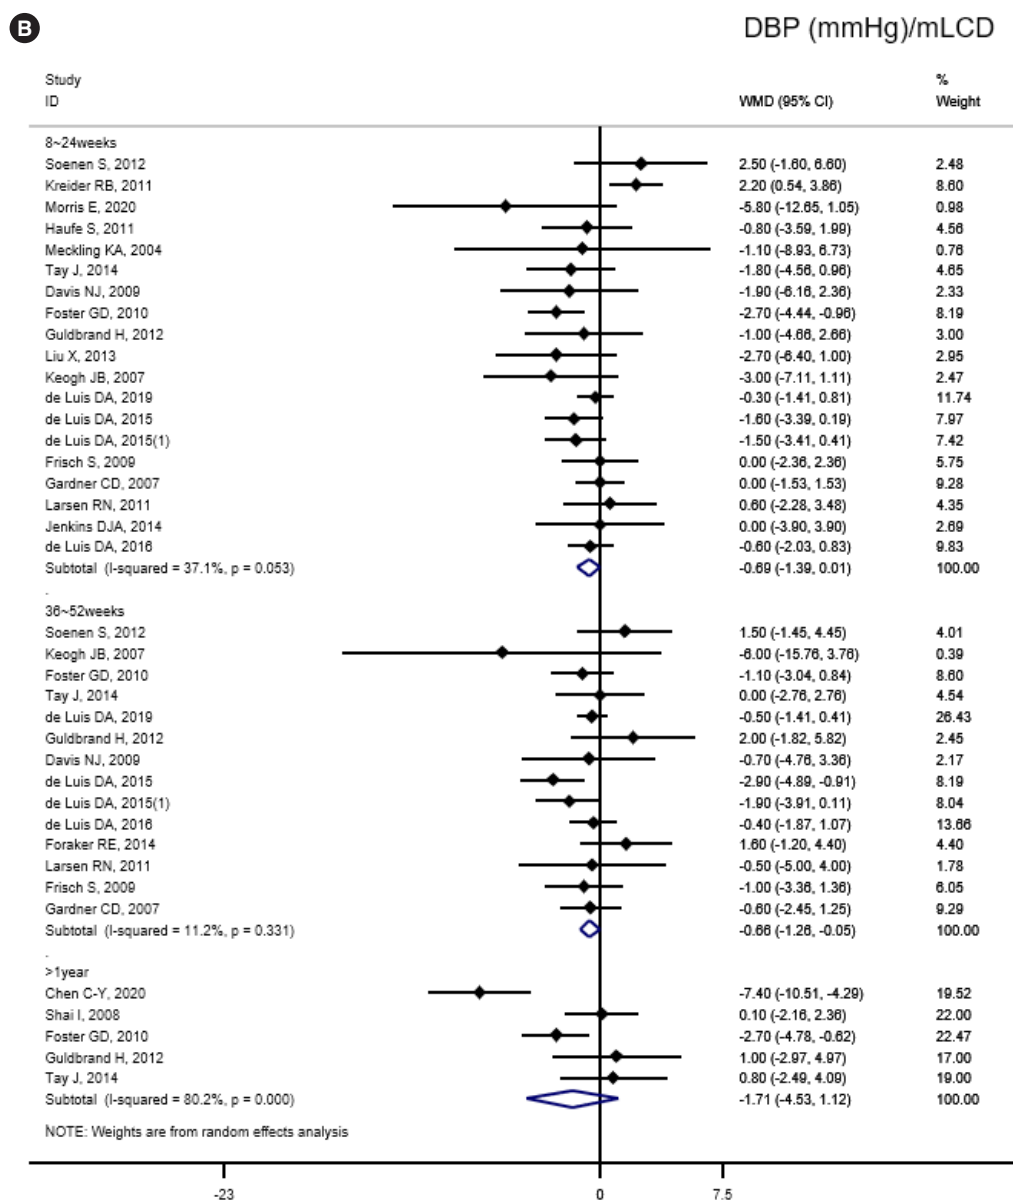

Supplementary Figure 8. (Continued) (B) mLCD on diastolic blood pressure (DBP).

(Continued to the next page)

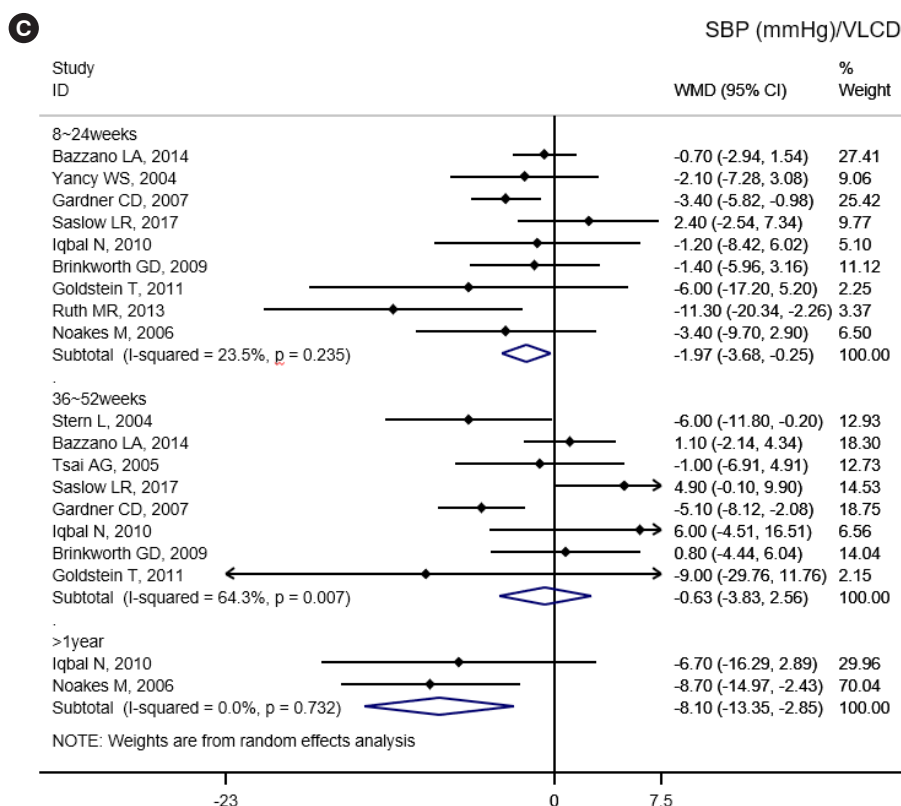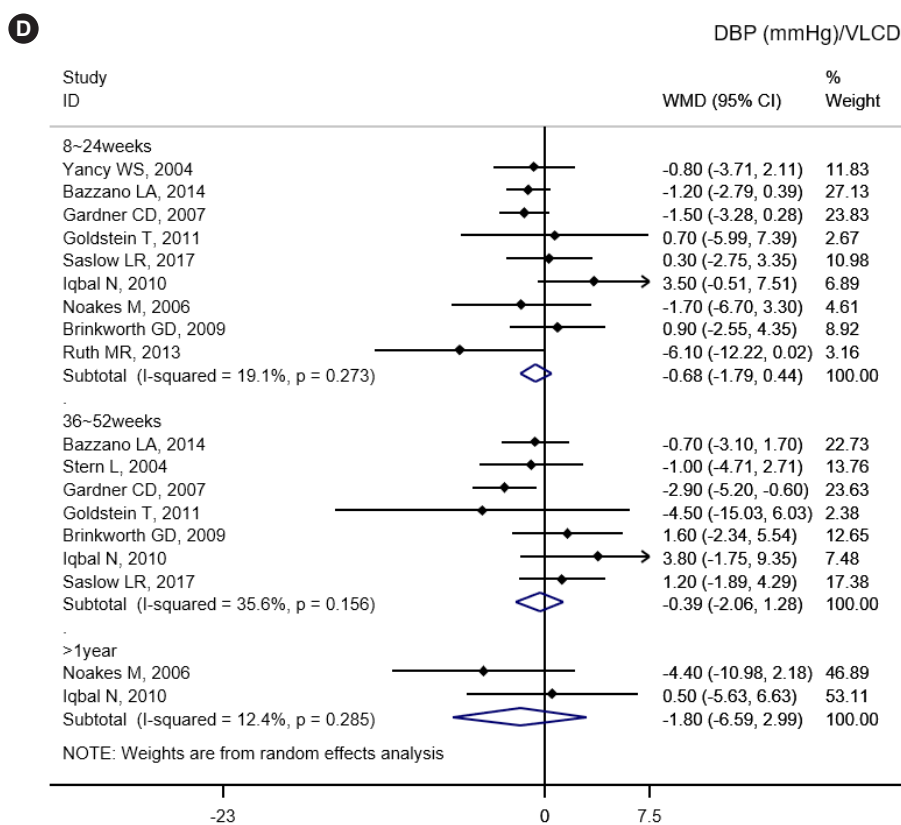

Supplementary Figure 8. (Continued) (C) Very-low carbohydrate diet (VLCD) on SBP. (D) VLCD on DBP. WMD, weighted mean difference; CI, confidence interval.



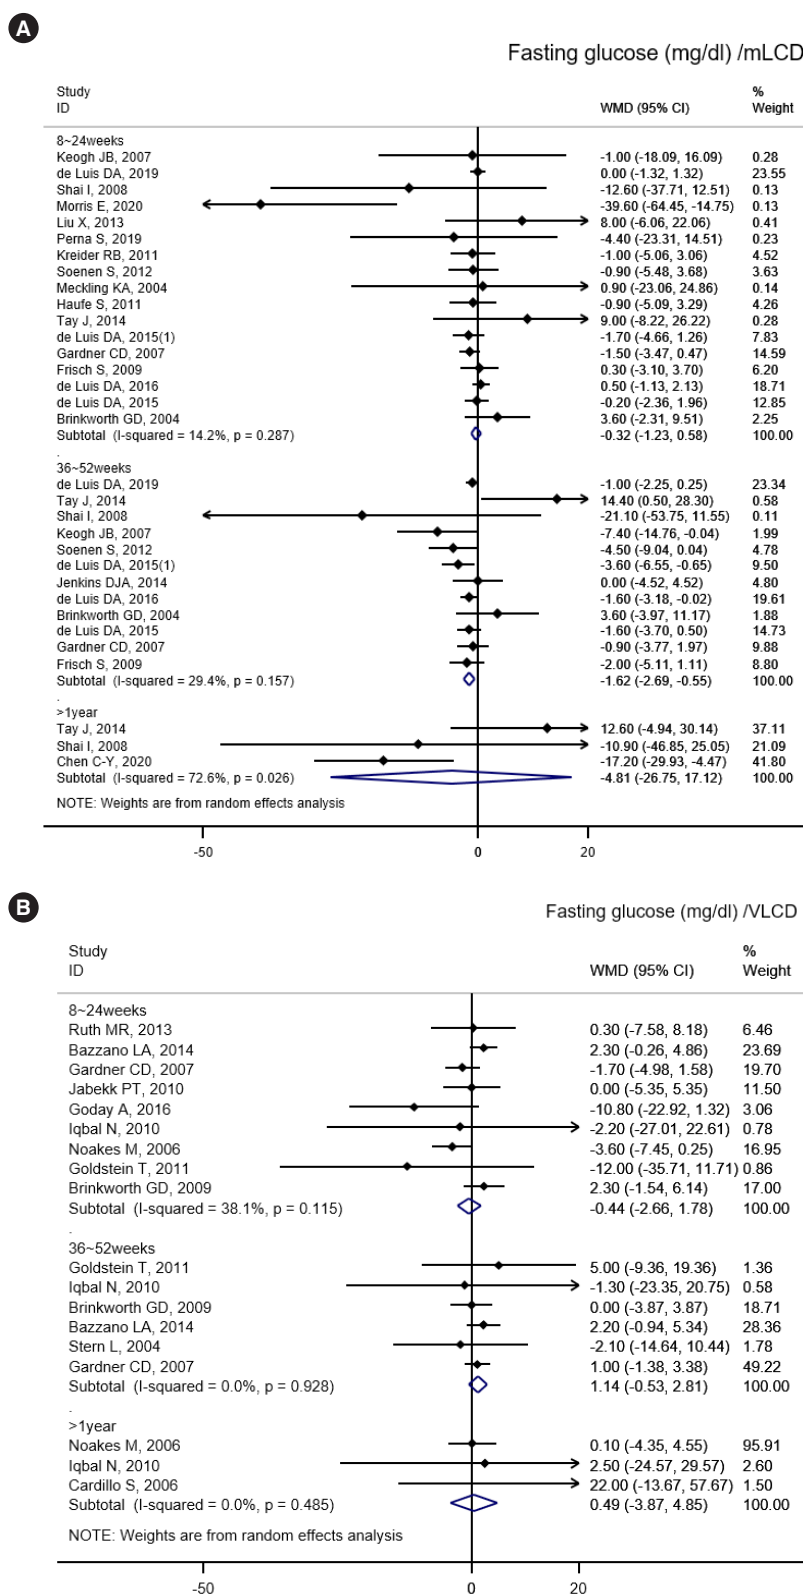

**Supplementary Figure 9.** Effects of carbohydrate-restricted diets on fasting glucose, glycosylated hemoglobin (HbA1c), and fasting insulin levels in adults with overweight/obesity. (A) Moderately-low or low carbohydrate diet (mLCD) on fasting blood glucose. (B) Very-low carbohydrate diet (VLCD) on fasting blood glucose.

(Continued to the next page)

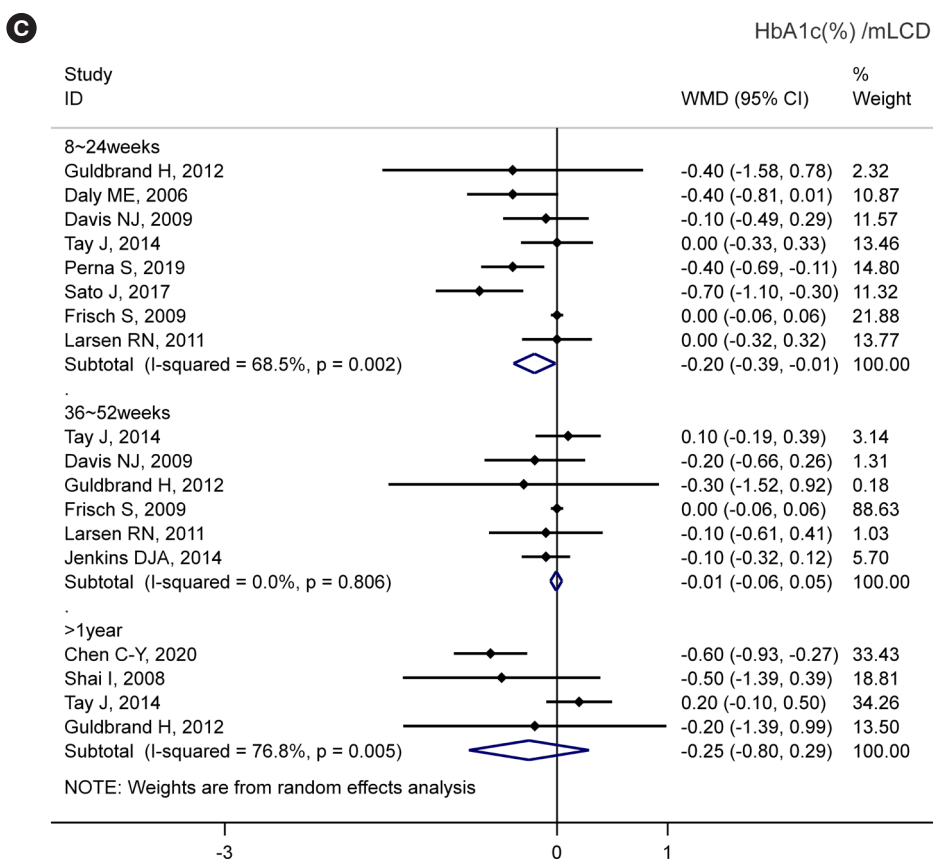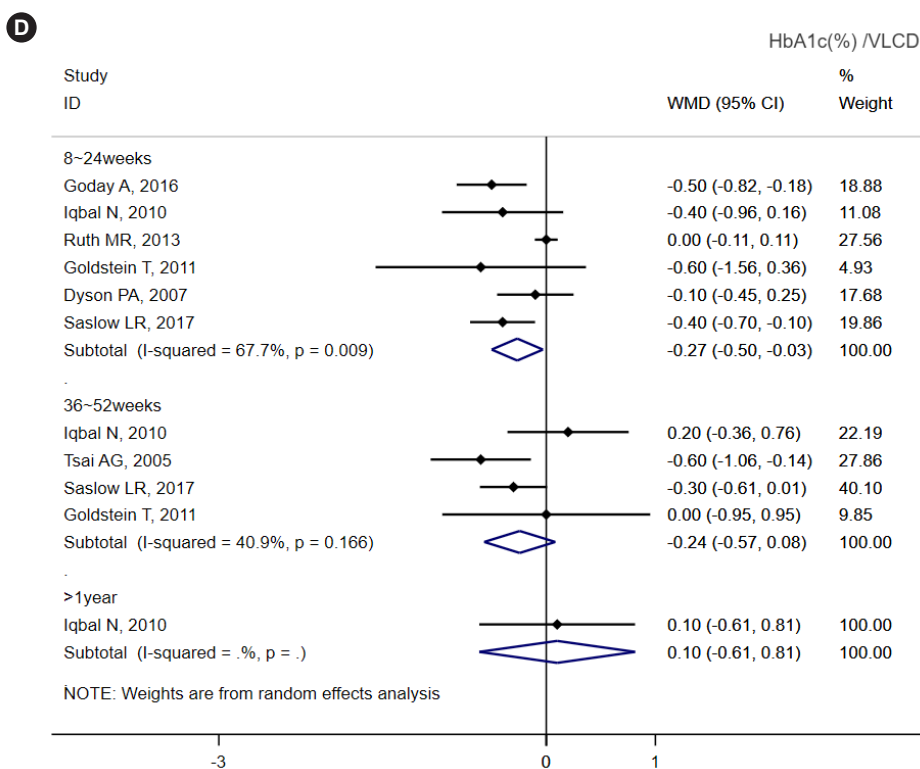

Supplementary Figure 9. (Continued) (C) mLCD on HbA1c. (D) VLCD on HbA1c level.

(Continued to the next page)

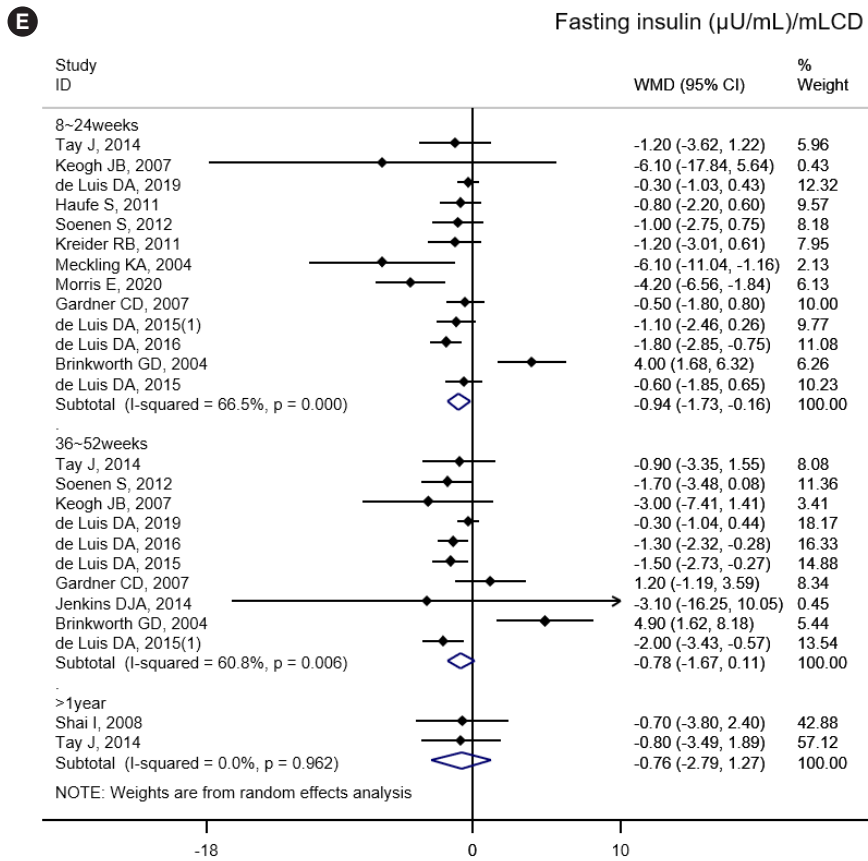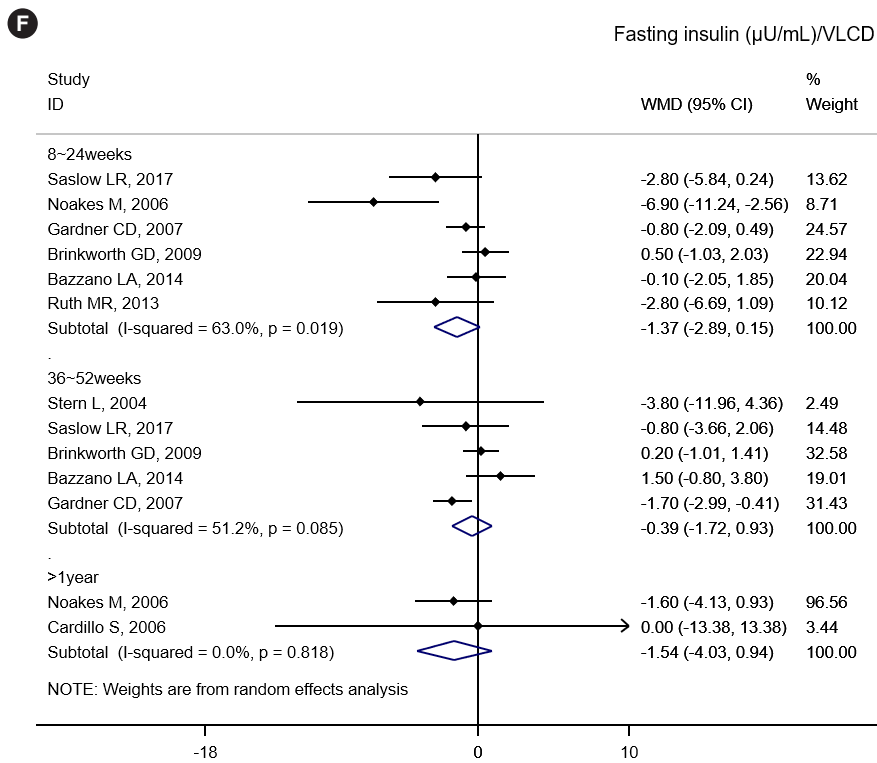

Supplementary Figure 9. (Continued) (E) mLCD on fasting insulin. (F) VLCD on fasting insulin. WMD, weighted mean difference; CI, confidence interval.

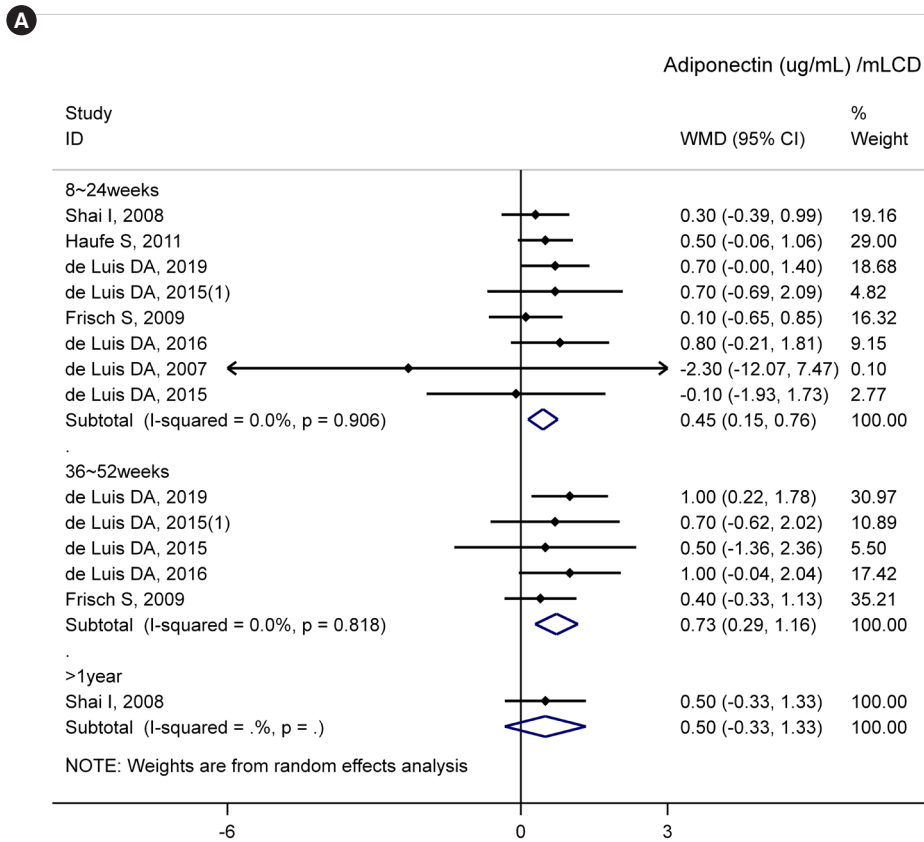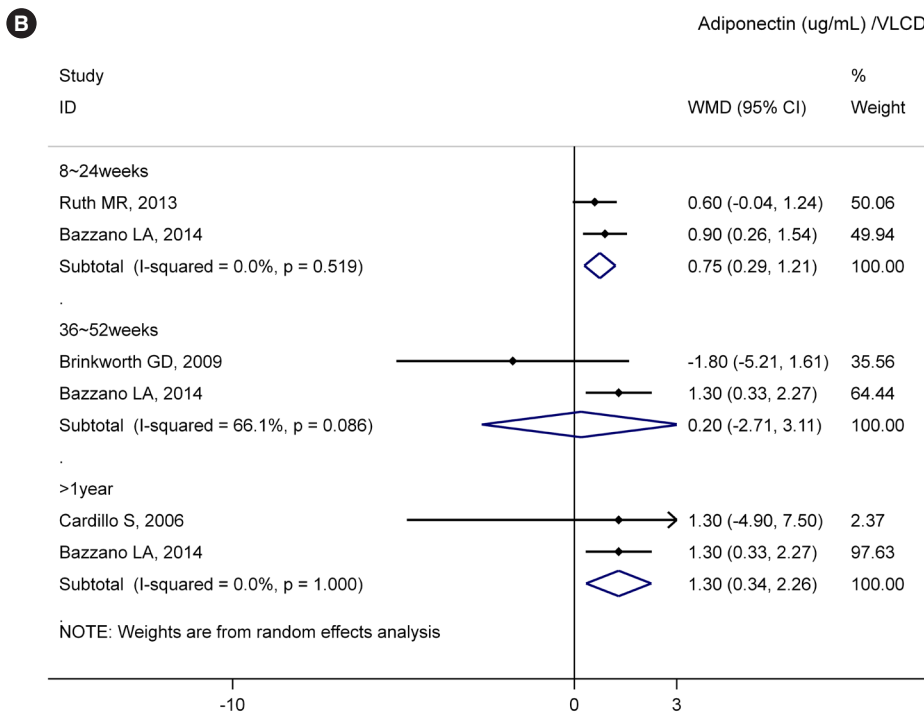

**Supplementary Figure 10.** Effects of carbohydrate-restricted diets on serum adiponectin and C-reactive protein (CRP) levels in adults with overweight/obesity. (A) Moderately-low or low carbohydrate diet (mLCD) on adiponectin. (B) Very-low carbohydrate diet (VLCD) on adiponectin. *(Continued to the next page)*

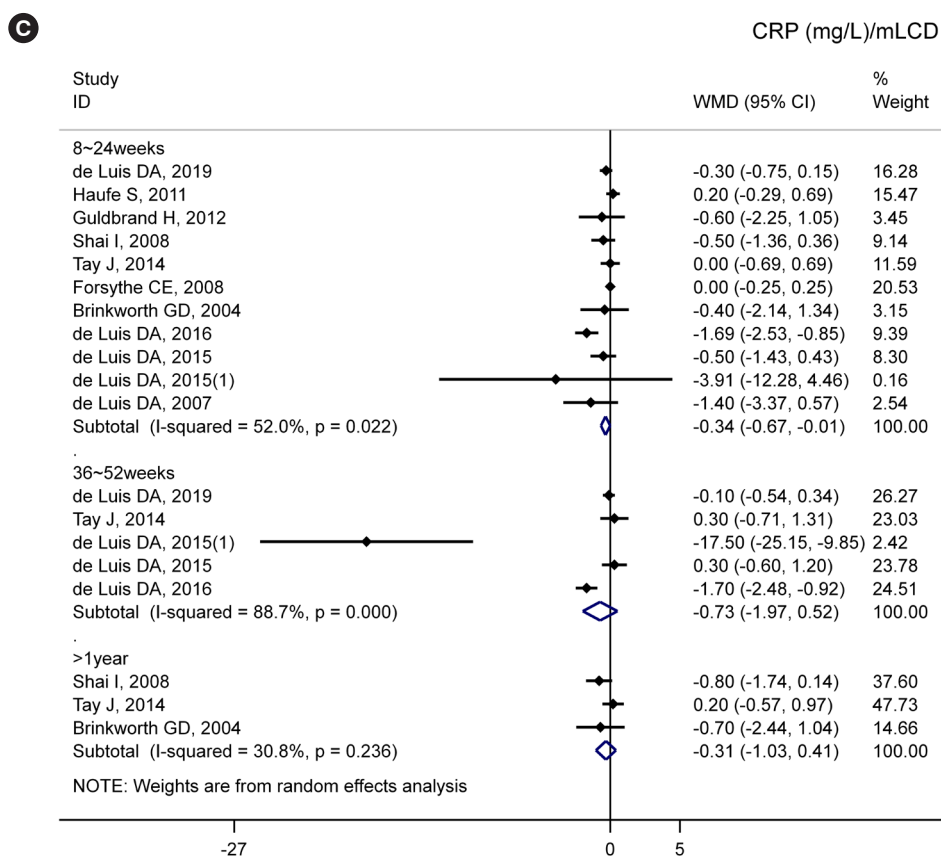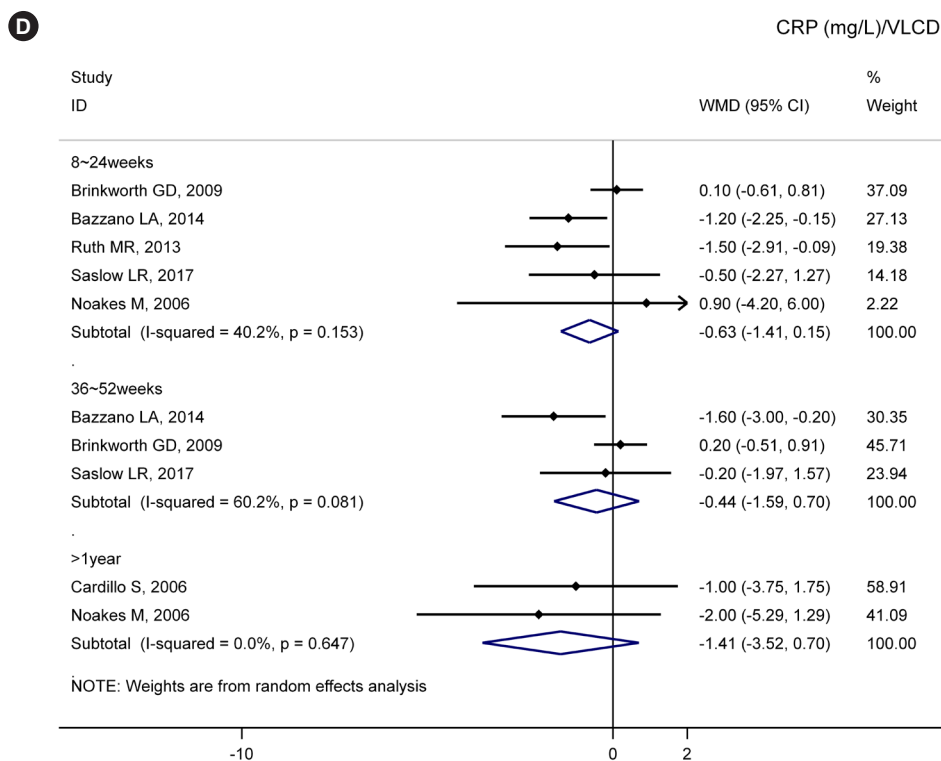

Supplementary Figure 10. (Continued) (C) mLCD on C-reactive protein (CRP). (D) VLCD on CRP.

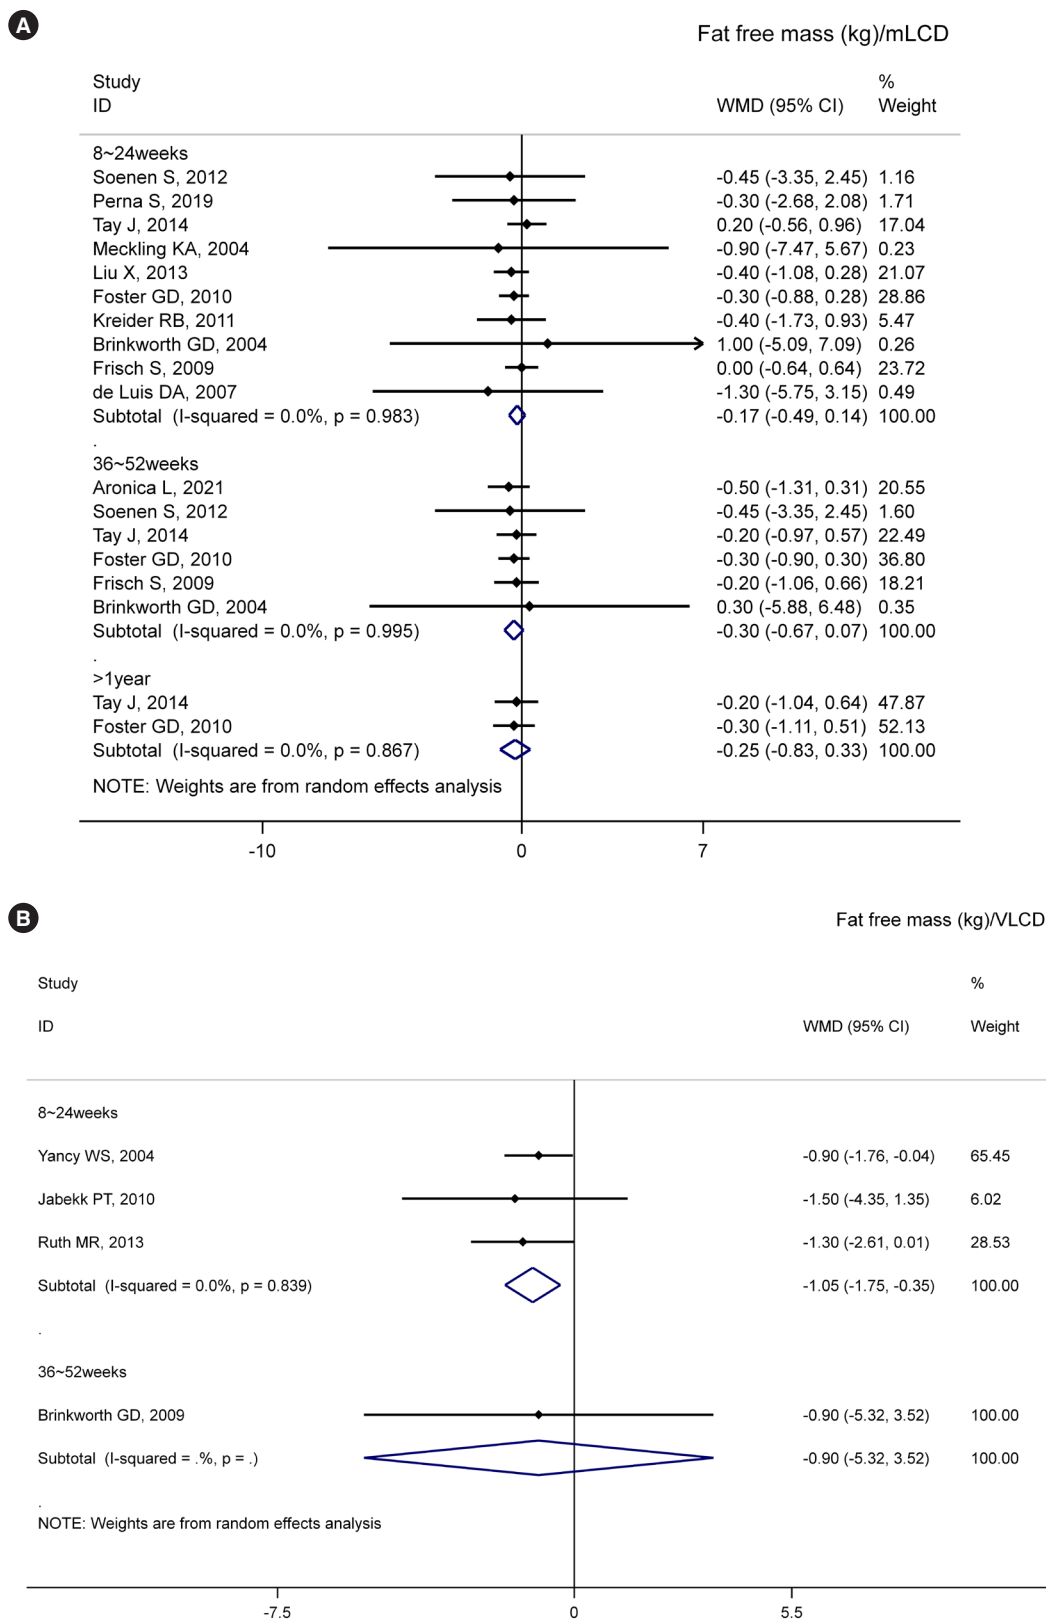

**Supplementary Figure 11.** Effects of carbohydrate-restricted diets on fat free mass in adults with overweight/obesity. (A) Moderately-low or low carbohydrate diet (mLCD). (B) Very-low carbohydrate diet (VLCD). WMD, weighted mean difference; CI, confidence interval.

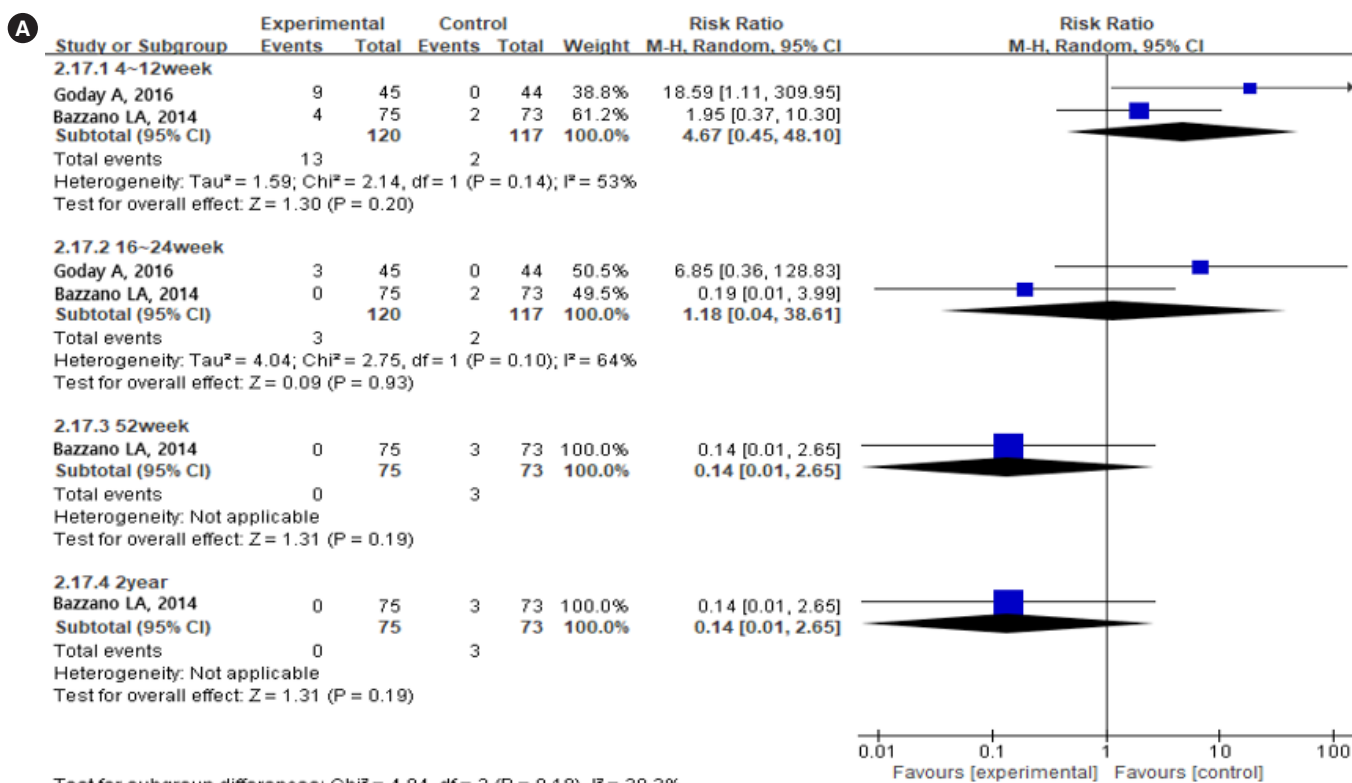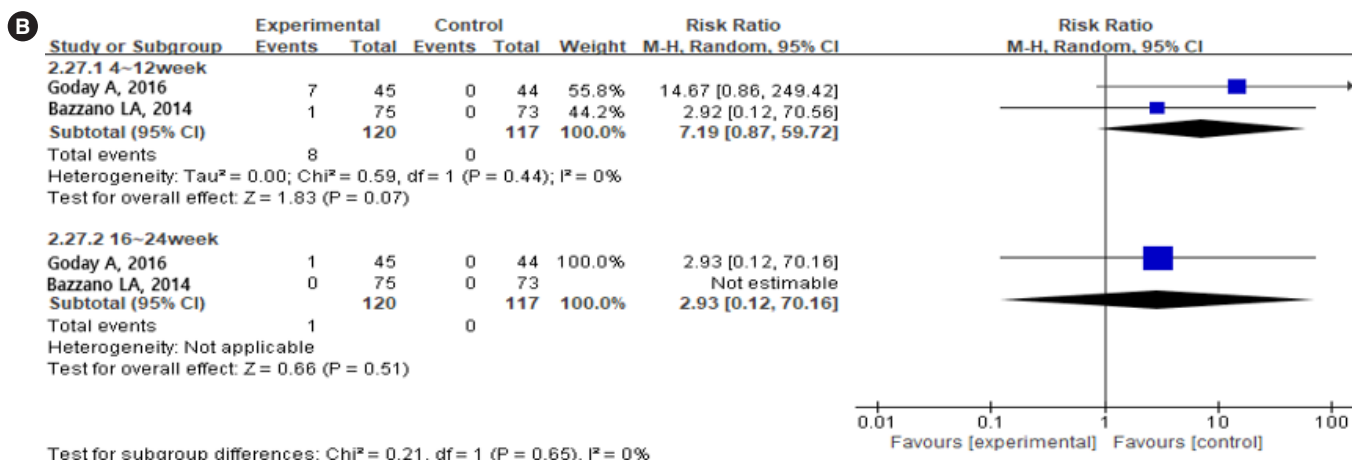

**Supplementary Figure 12.** Adverse events reported regarding carbohydrate-restricted diets in adults with overweight/obesity. (A) Nausea. (B) Vomiting. *(Continued to the next page)*

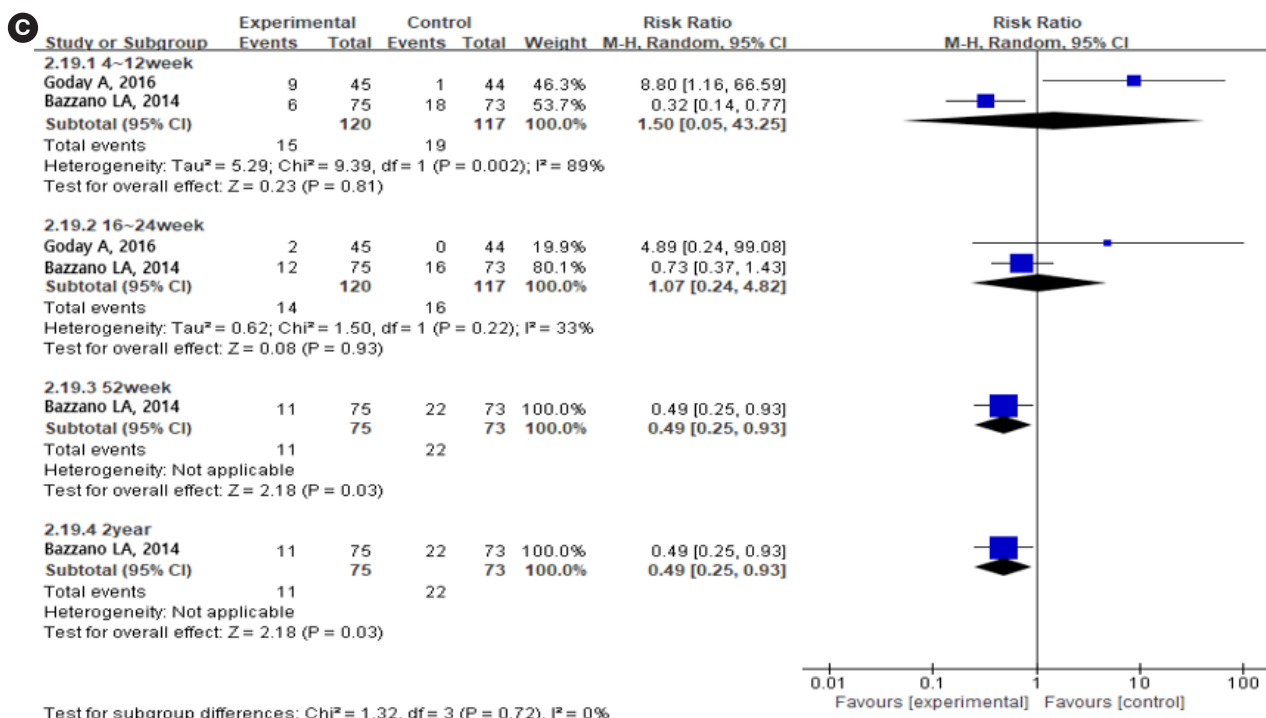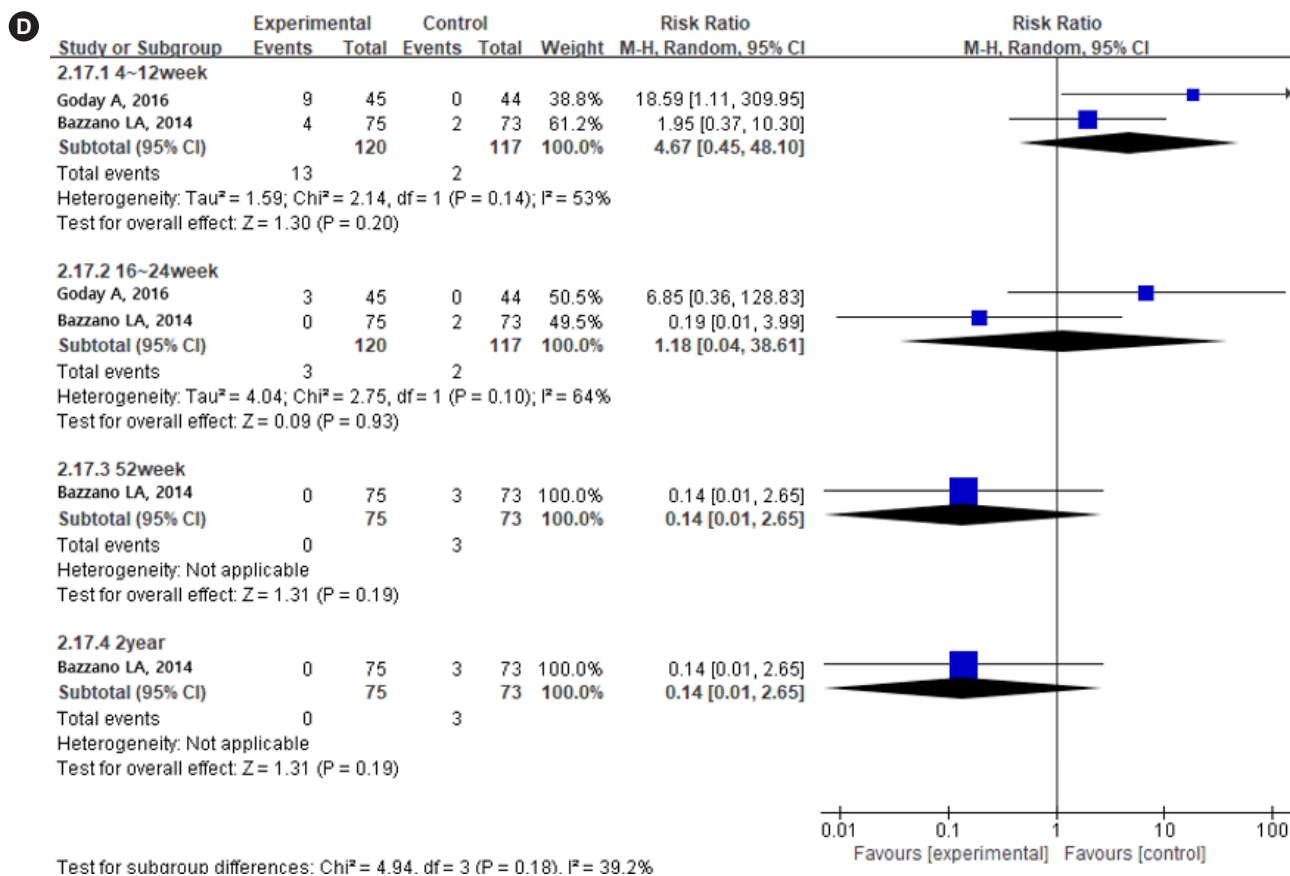

Supplementary Figure 12. (Continued) (C) Headache. (D) Constipation. M-H, Mantel-Haenszel; CI, confidence interval.



|                      | Risk of bias arising from the randomization process | Risk of bias due to deviations from the intended interventions | Risk of bias due to missing outcome data | Risk of bias in measurement of the outcome | Risk of bias in selection of the reported result |
|----------------------|-----------------------------------------------------|----------------------------------------------------------------|------------------------------------------|--------------------------------------------|--------------------------------------------------|
| Barnosky A, 2017     | ?                                                   | -                                                              | -                                        | +                                          | +                                                |
| Bowen J, 2018        | +                                                   | ?                                                              | +                                        | +                                          | +                                                |
| Carter S, 2016       | +                                                   | -                                                              | +                                        | +                                          | +                                                |
| Carter S, 2018       | +                                                   | ?                                                              | +                                        | +                                          | +                                                |
| Kunduraci YE, 2000   | ?                                                   | ?                                                              | ?                                        | +                                          | +                                                |
| Panizza CE, 2019     | +                                                   | +                                                              | +                                        | +                                          | +                                                |
| Phillips NE, 2021    | +                                                   | ?                                                              | ?                                        | +                                          | +                                                |
| Razavi R, 2021       | ?                                                   | -                                                              | +                                        | +                                          | ?                                                |
| Trepanowski JF, 2017 | ?                                                   | -                                                              | -                                        | +                                          | ?                                                |
| Varady KA, 2013      | +                                                   | -                                                              | +                                        | +                                          | +                                                |

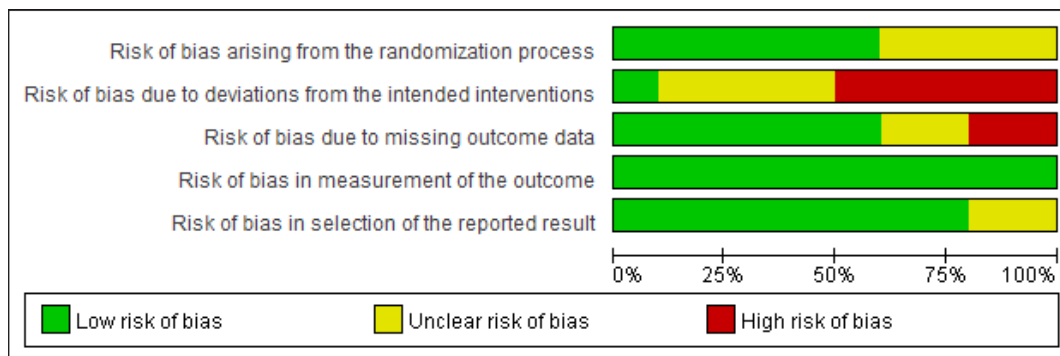

Supplementary Figure 13. Risk of bias assessment in studies evaluating the effects of intermittent fasting in adults with overweight/obesity.

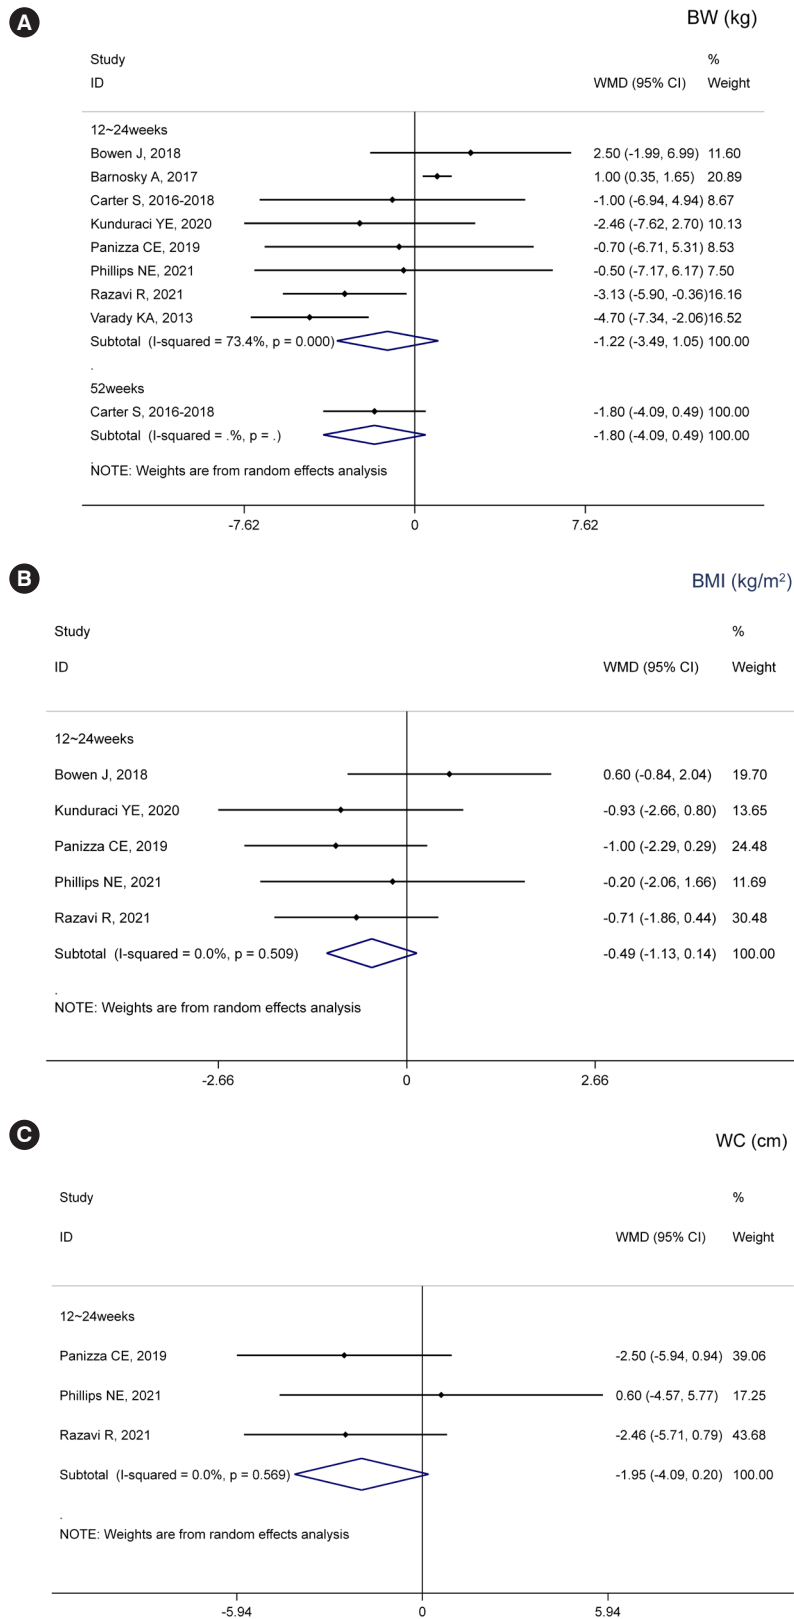

Supplementary Figure 14. Effects of intermittent fasting on (A) body weight (BW), (B) body mass index (BMI), (C) waist circumference (WC).

(Continued to the next page)

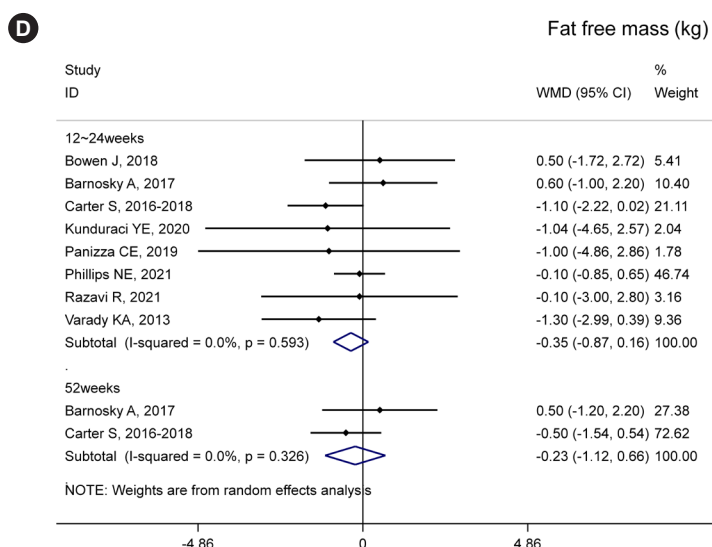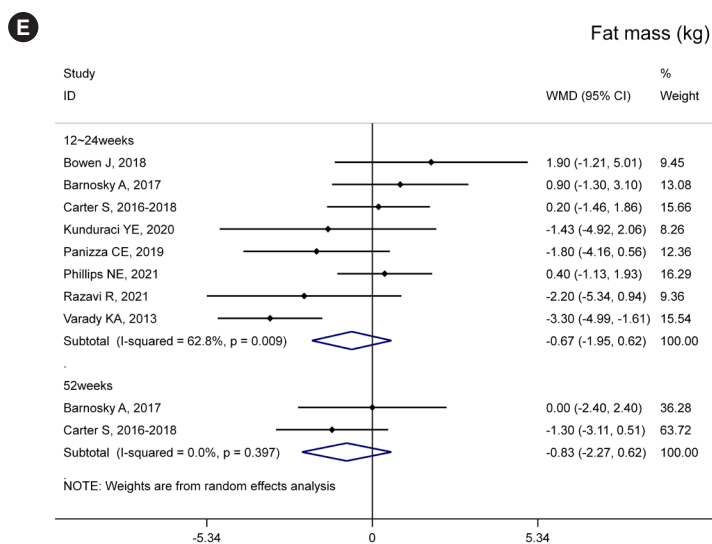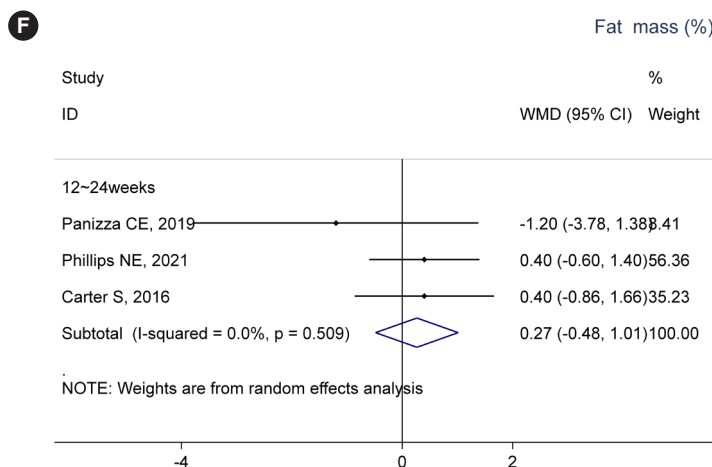

Supplementary Figure 14. (Continued) (D) fat free mass, (E) fat mass, and (F) fat mass percentage in adults with overweight/obesity. WMD, weighted mean difference; CI, confidence interval.

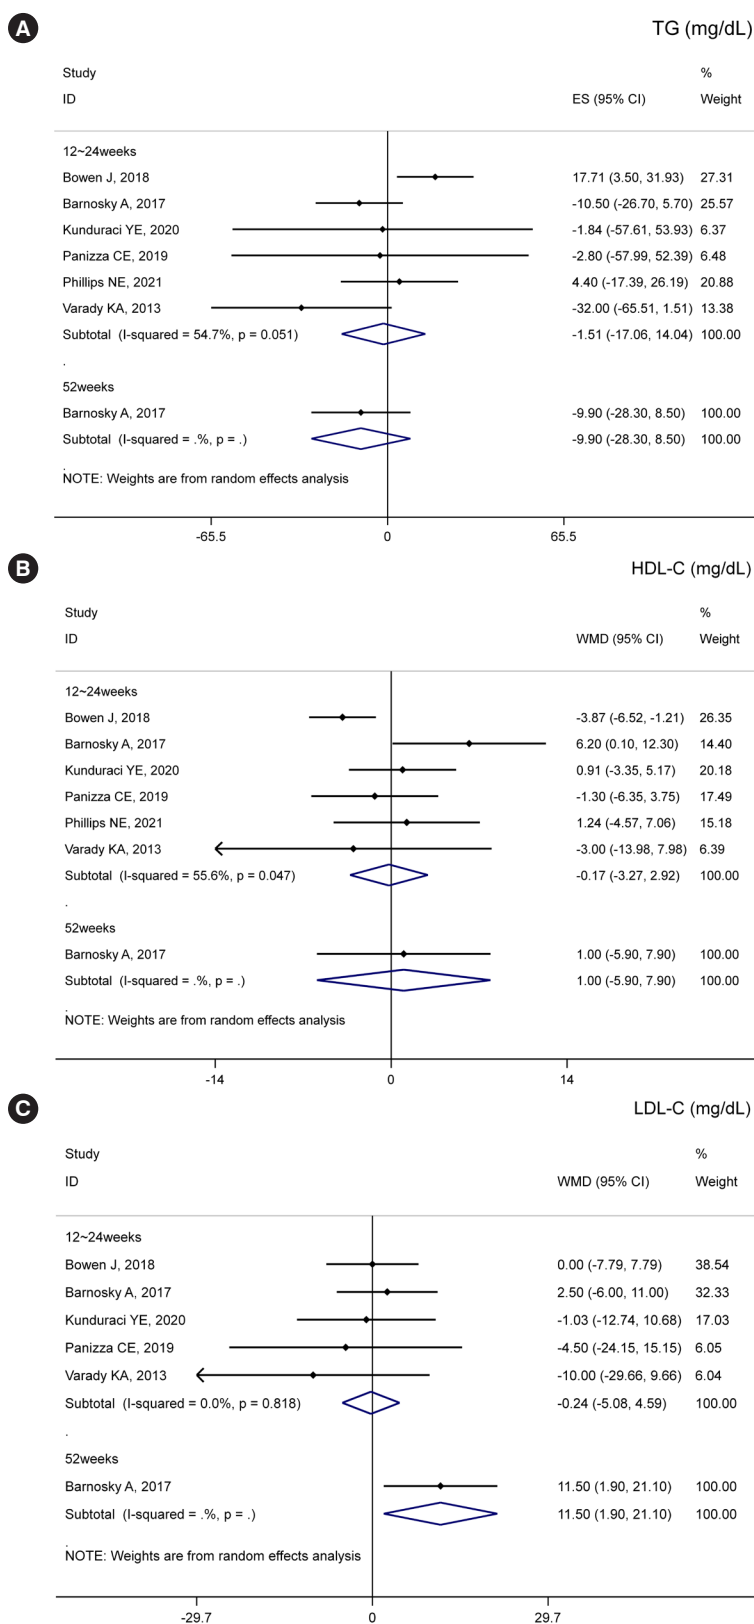

**Supplementary Figure 15.** Effect of Intermittent fasting on (A) triglyceride (TG; mg/dL), (B) high-density lipoprotein cholesterol (HDL-C; mg/dL), (C) low-density lipoprotein cholesterol (LDL-C; mg/dL). *(Continued to the next page)*

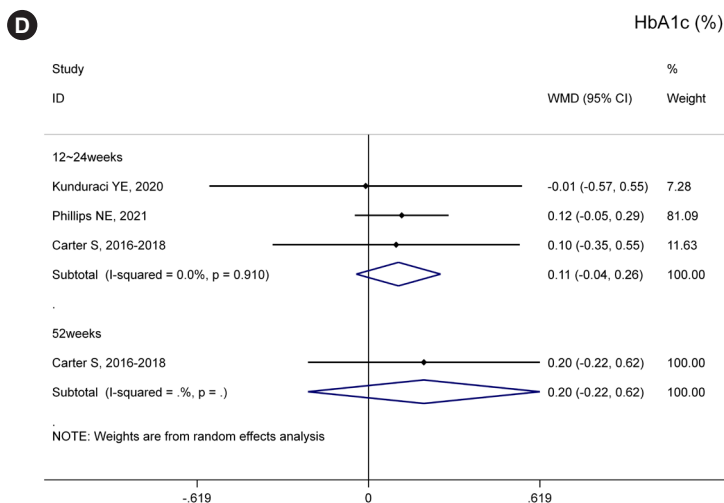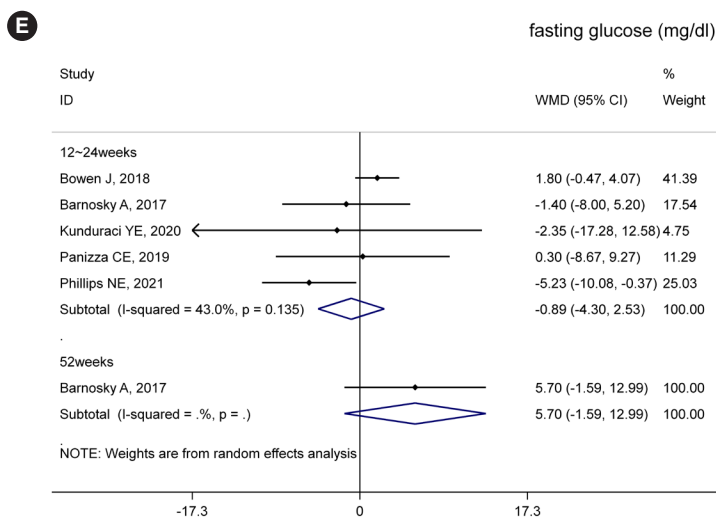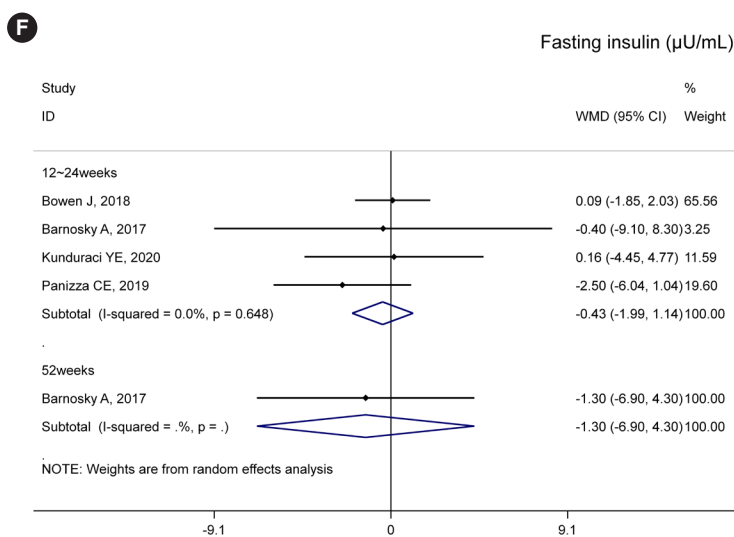

Supplementary Figure 15. (Continued) (D) glycosylated hemoglobin (HbA1c; %), (E) fasting glucose (mg/dL), (F) fasting insulin (µU/mL).

(Continued to the next page)

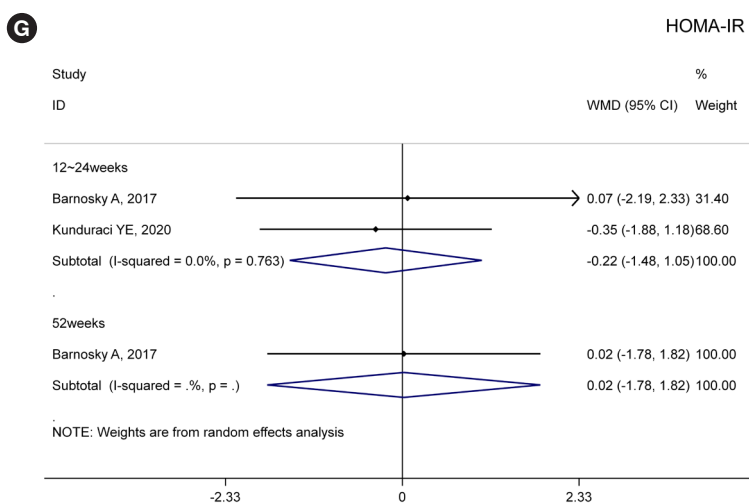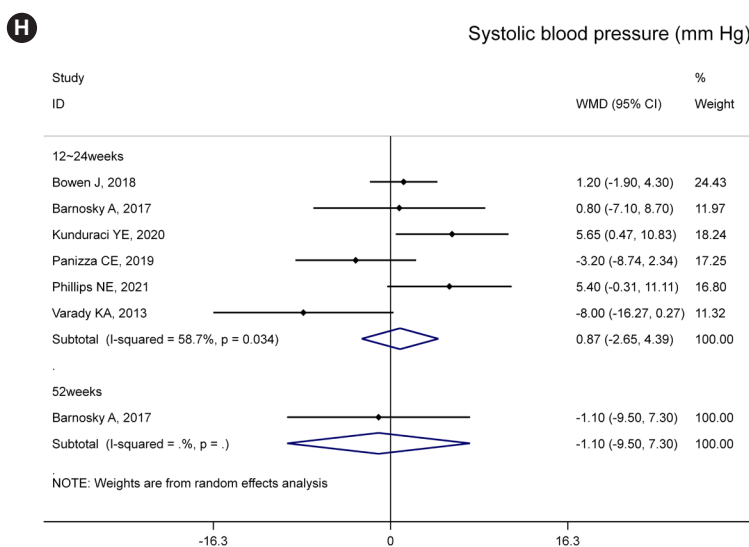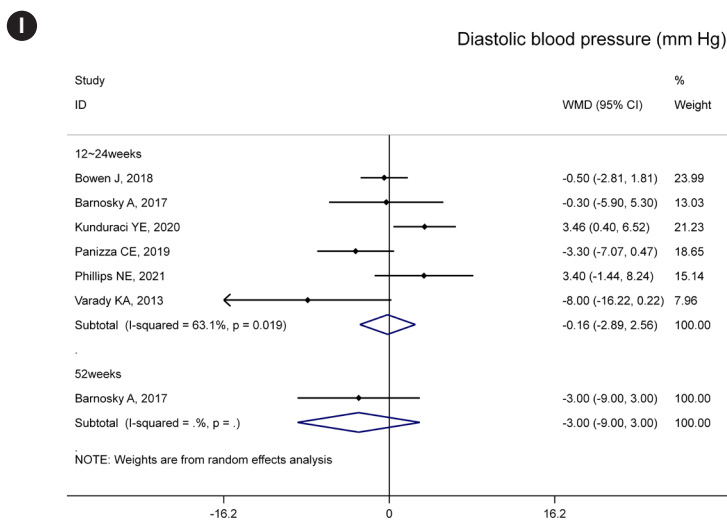

**Supplementary Figure 15.** (Continued) (G) homeostatic model assessment for insulin resistance (HOMA-IR), (H) systolic blood pressure (SBP; mmHg), and (I) diastolic blood pressure (DBP; mmHg) in adults with overweight/obesity. ES, effect size; CI, confidence interval; WMD, weighted mean difference.

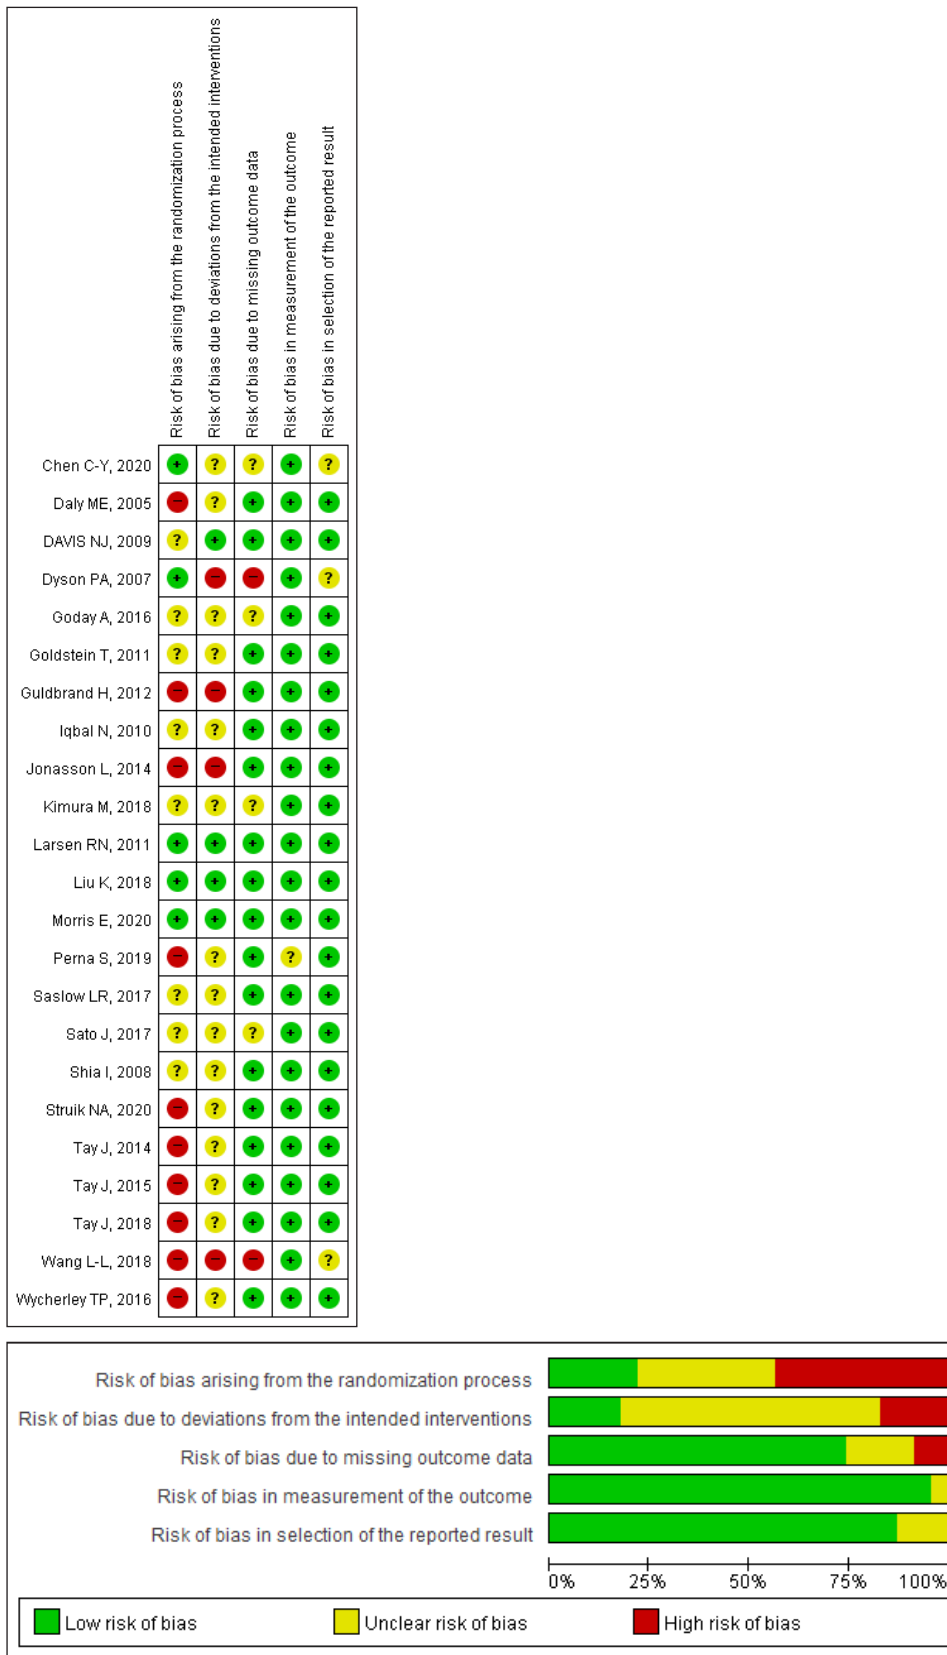

Supplementary Figure 16. Risk of bias assessment in studies evaluating the effects of carbohydrate-restricted diets in adults with diabetes.

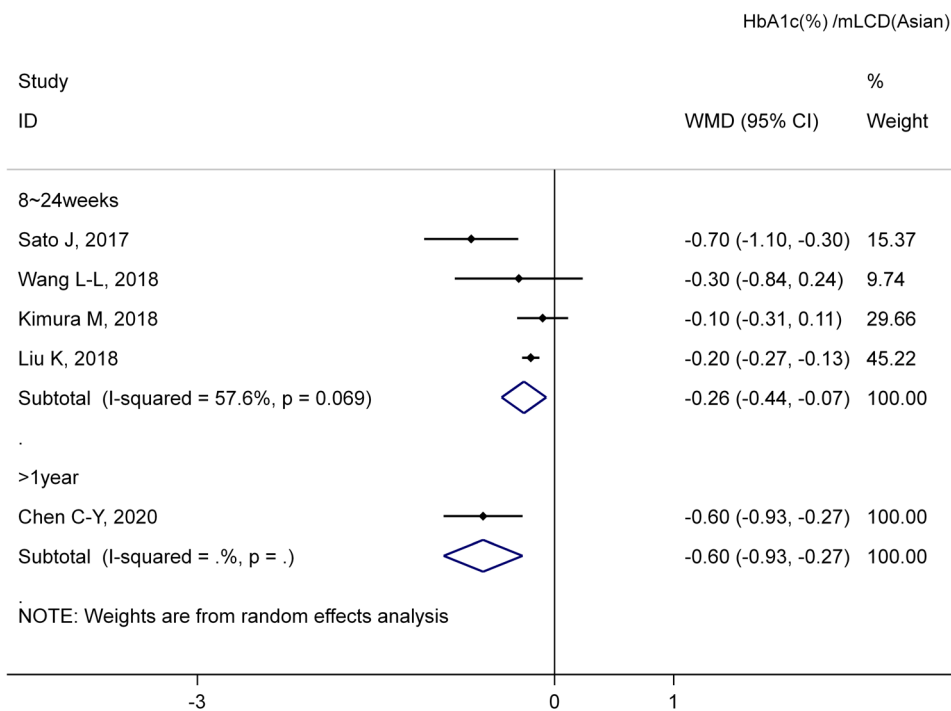

**Supplementary Figure 17.** Effects of carbohydrate-restricted diets on glycosylated hemoglobin (HbA1c) in adults with diabetes in East-Asian countries (China, Japan, Taiwan). mLCD, moderately-low or low carbohydrate diet; WMD, weighted mean difference; CI, confidence interval.





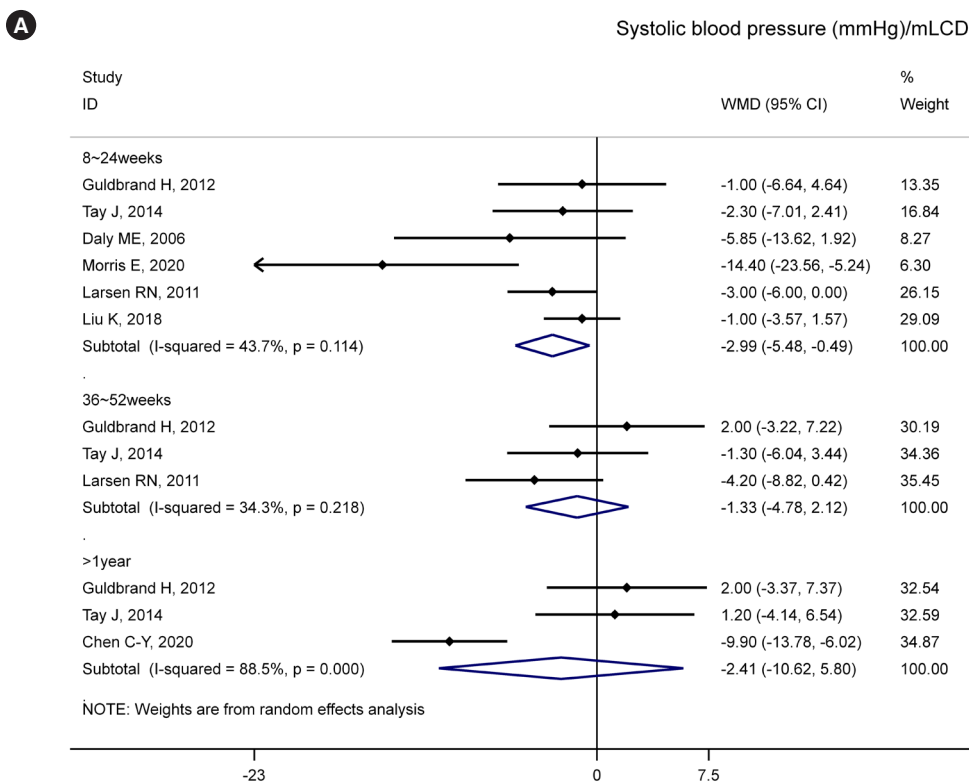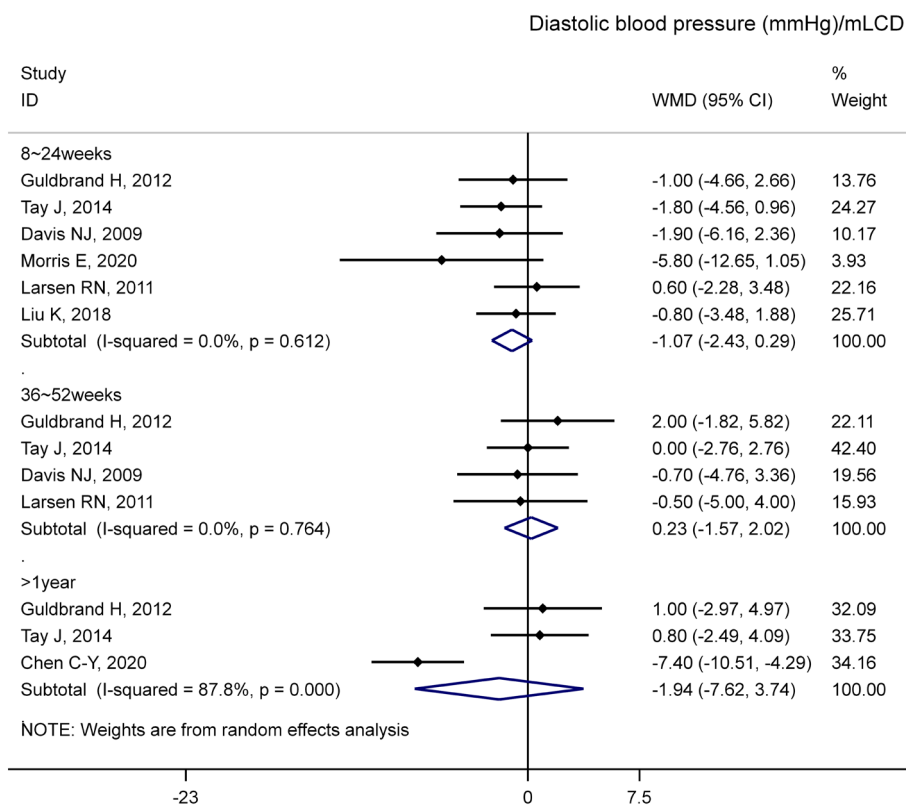

**Supplementary Figure 19.** Effect of carbohydrate-restricted diets on blood pressure in adults with diabetes. (A) Moderately-low or low carbohydrate diets (mLCD). *(Continued to the next page)*

**B**

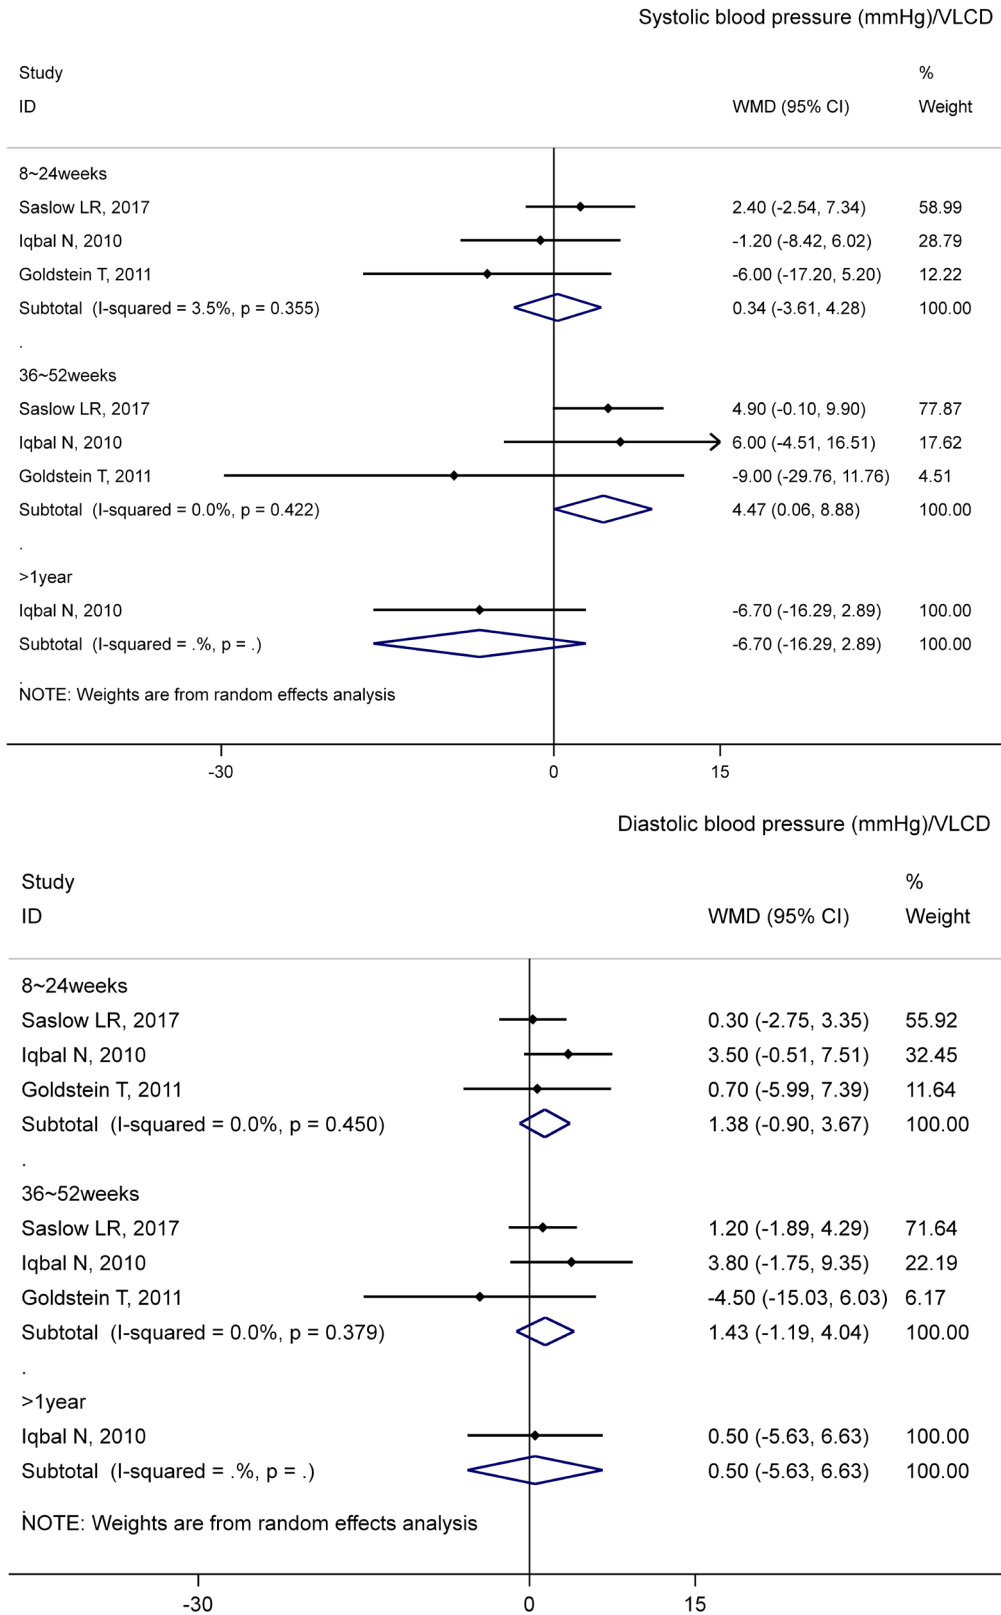

Supplementary Figure 19. (Continued) (B) Very-low carbohydrate diets (VLCD). WMD, weighted mean difference; CI, confidence interval.

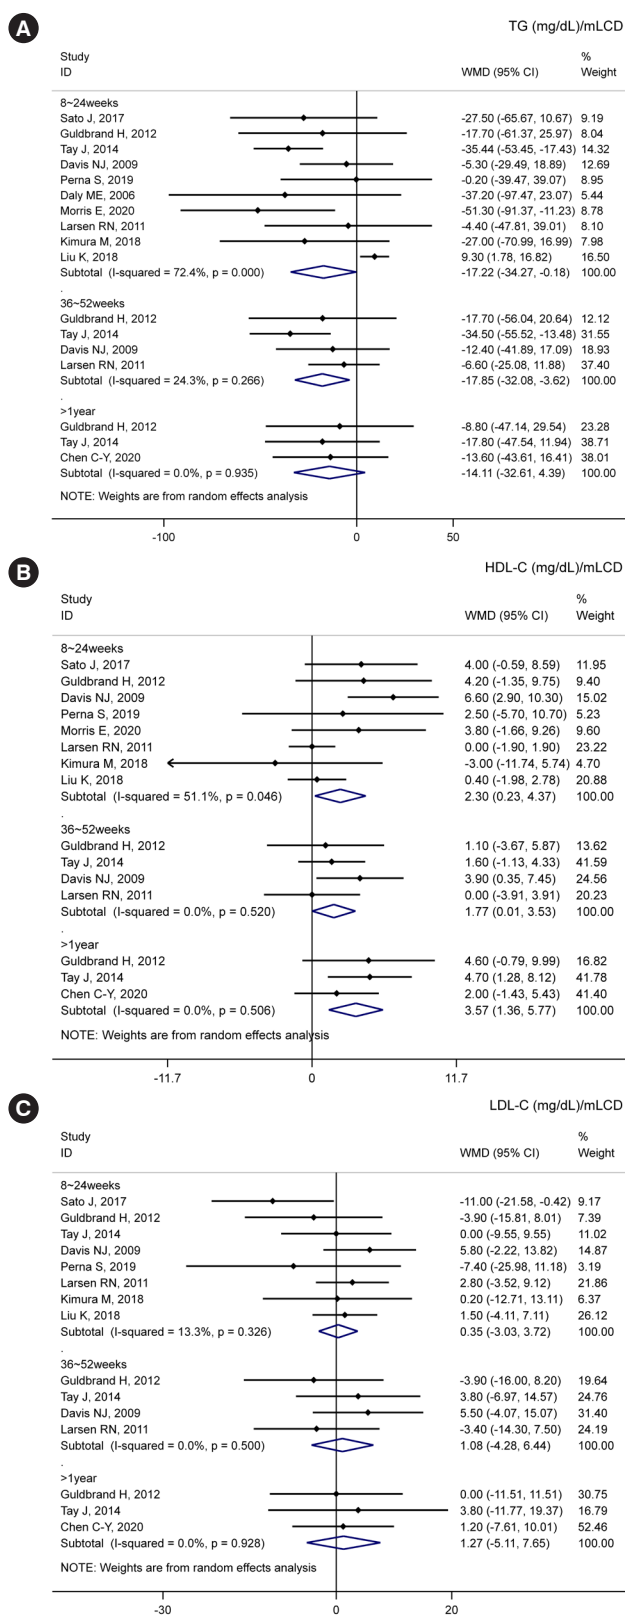

**Supplementary Figure 20.** Effects of carbohydrate-restricted diets on lipid profiles in adults with diabetes. (A) Moderately-low or low carbohydrate diets (mLCD) on triglyceride (TG). (B) mLCD on high-density lipoprotein cholesterol (HDL-C). (C) mLCD on low-density lipoprotein cholesterol (LDL-C).

(Continued to the next page)

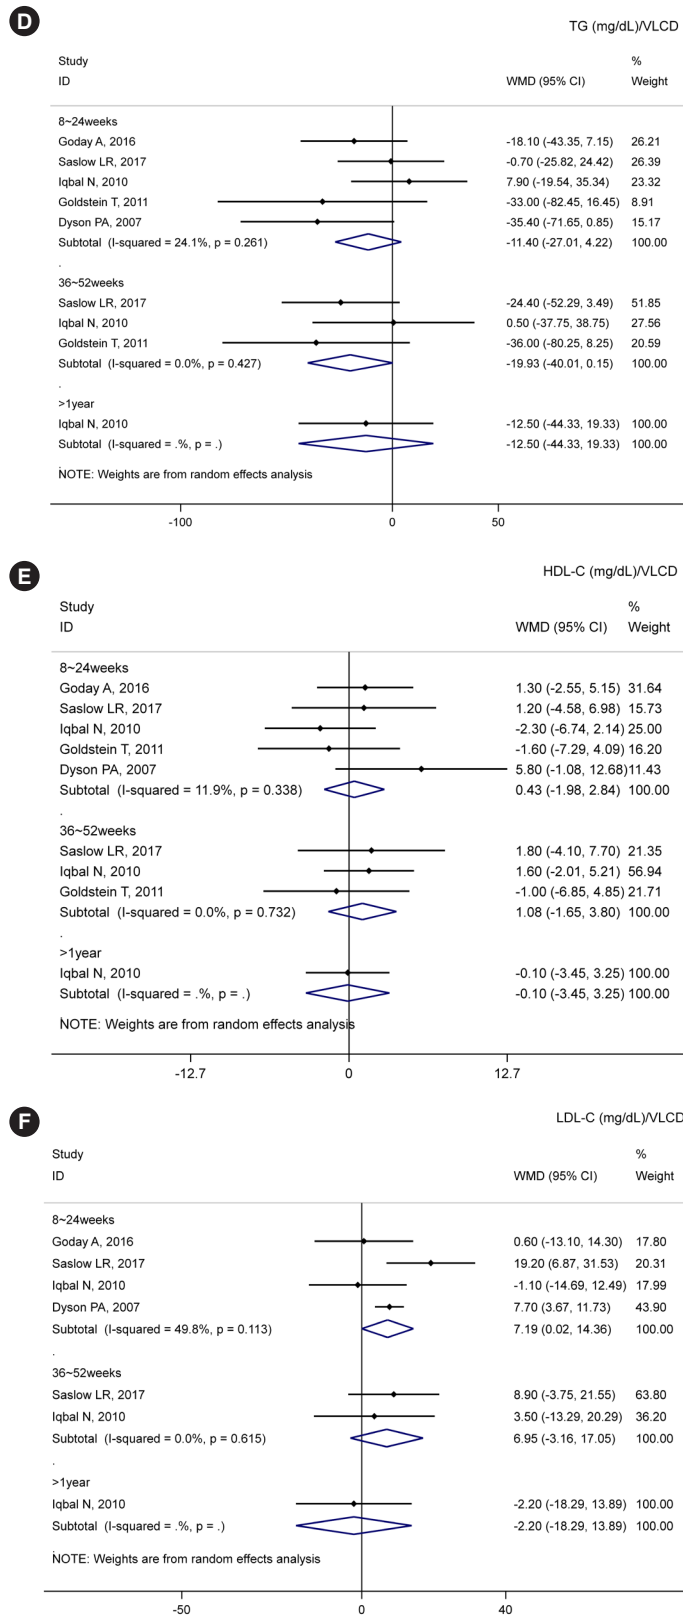

Supplementary Figure 20. (Continued) (D) Very-low carbohydrate diets (VLCD) on TG. (E) VLCD on HDL-C. (F) VLCD on LDL-C. WMD, weighted mean difference; CI, confidence interval.

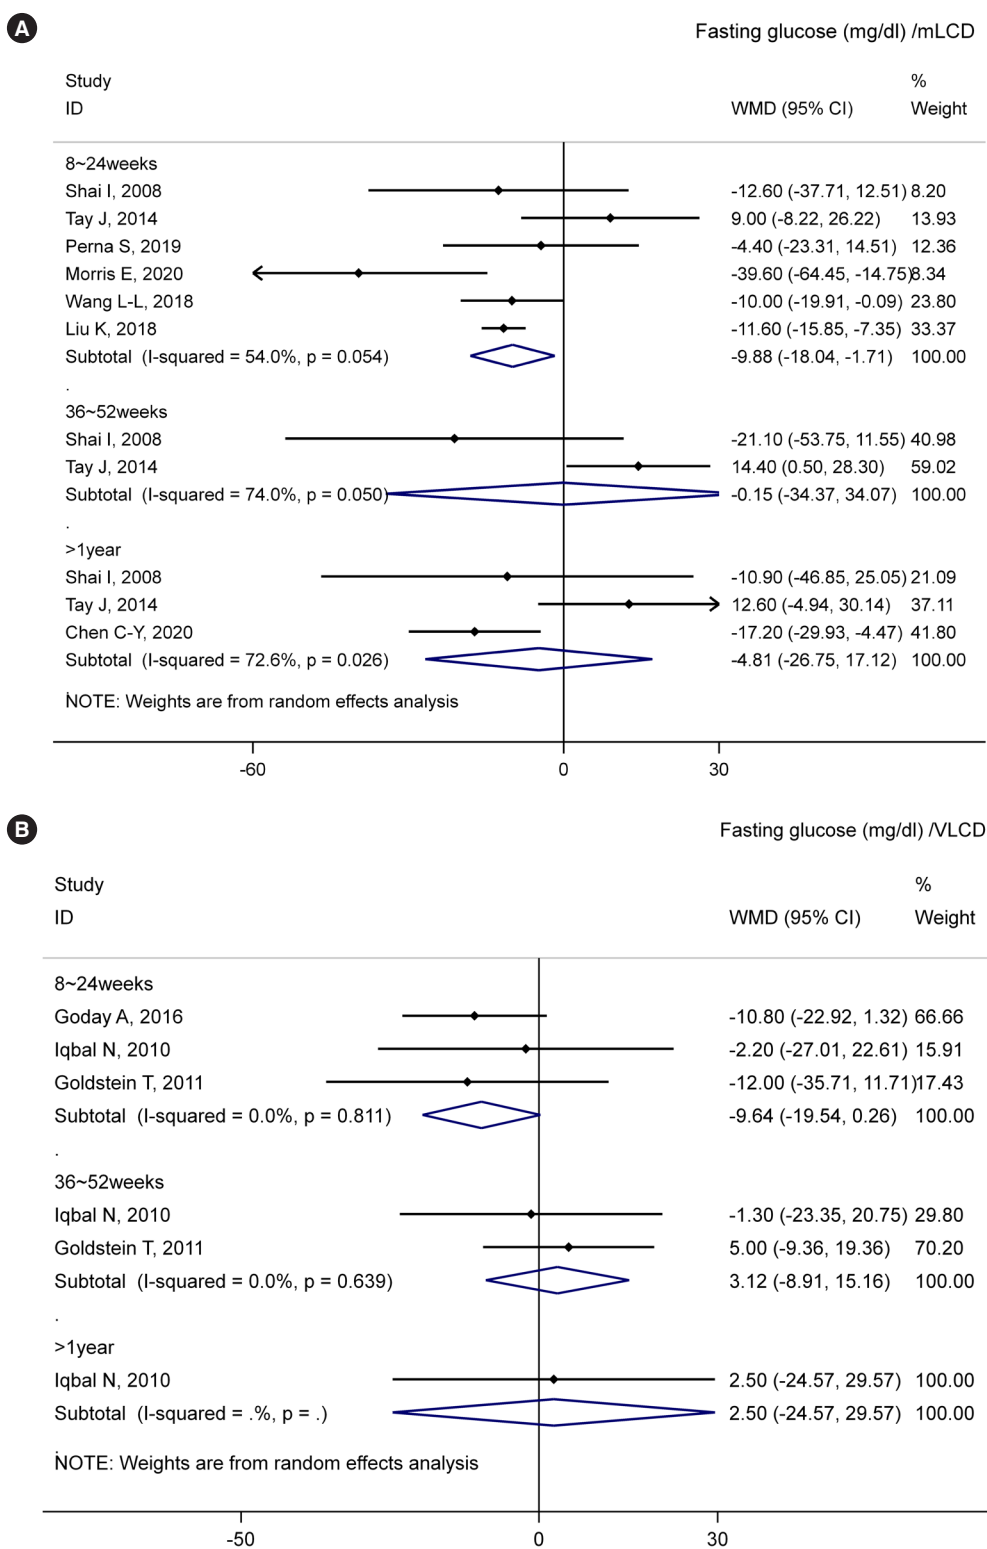

**Supplementary Figure 21.** Effects of carbohydrate-restricted diets on fasting glucose in adults with diabetes. (A) Moderately-low or low carbohydrate diets (mLCD). (B) Very-low carbohydrate diets (VLCD). WMD, weighted mean difference; CI, confidence interval.

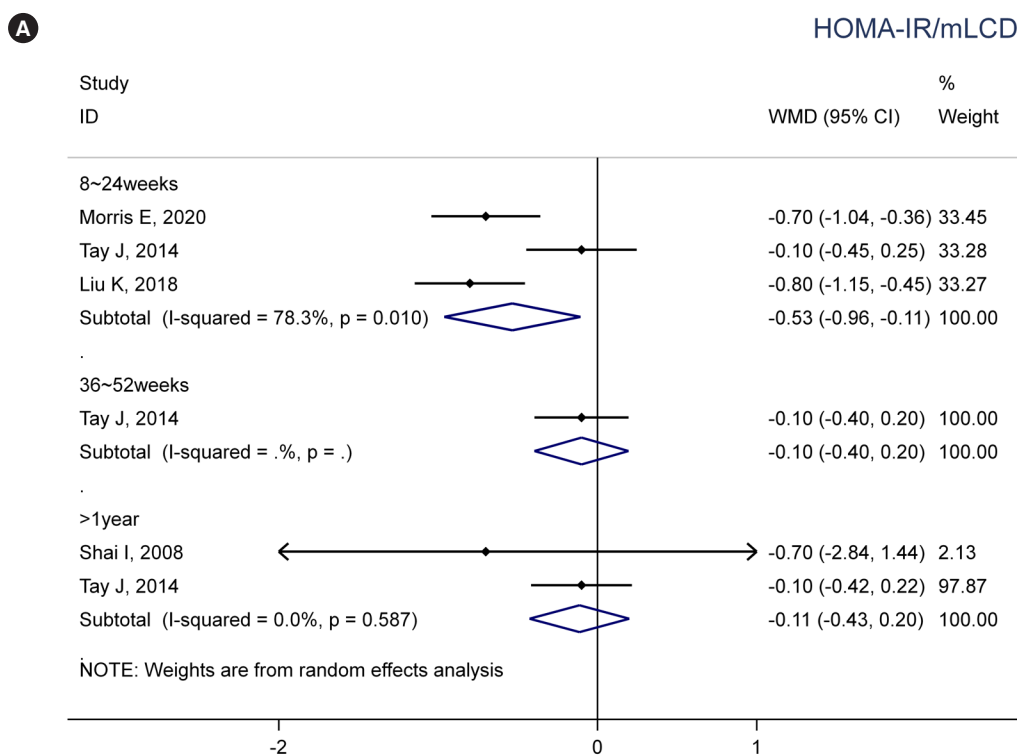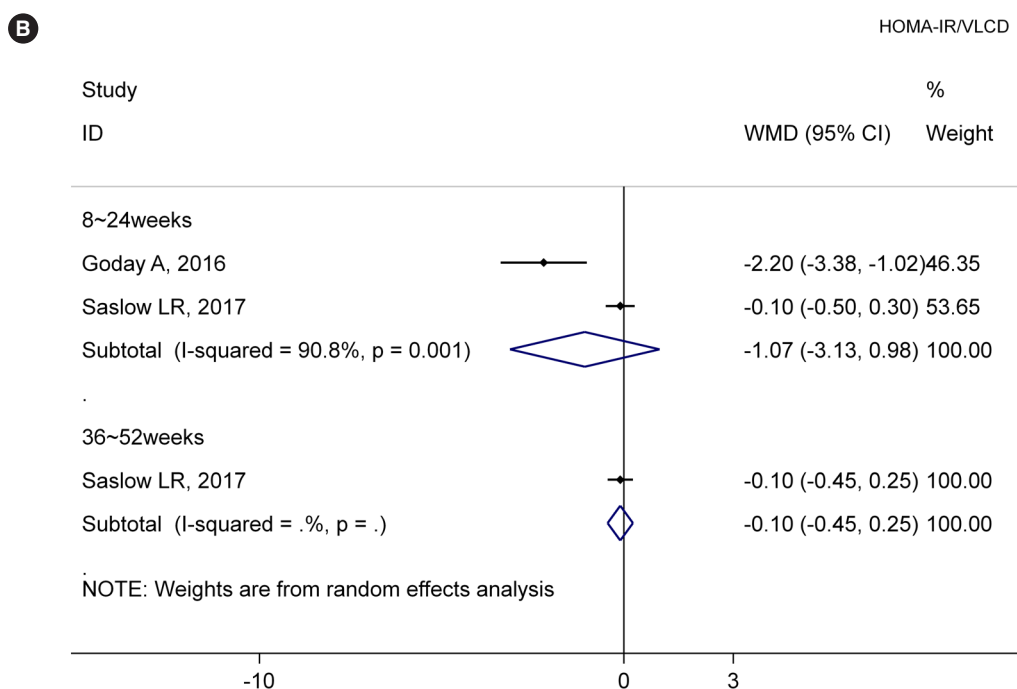

**Supplementary Figure 22.** Effects of carbohydrate-restricted diets on insulin resistance (HOMA-IR) in adults with diabetes. (A) Moderately-low or low carbohydrate diets (mLCD). (B) Very-low carbohydrate diets (VLCD). WMD, weighted mean difference; CI, confidence interval.

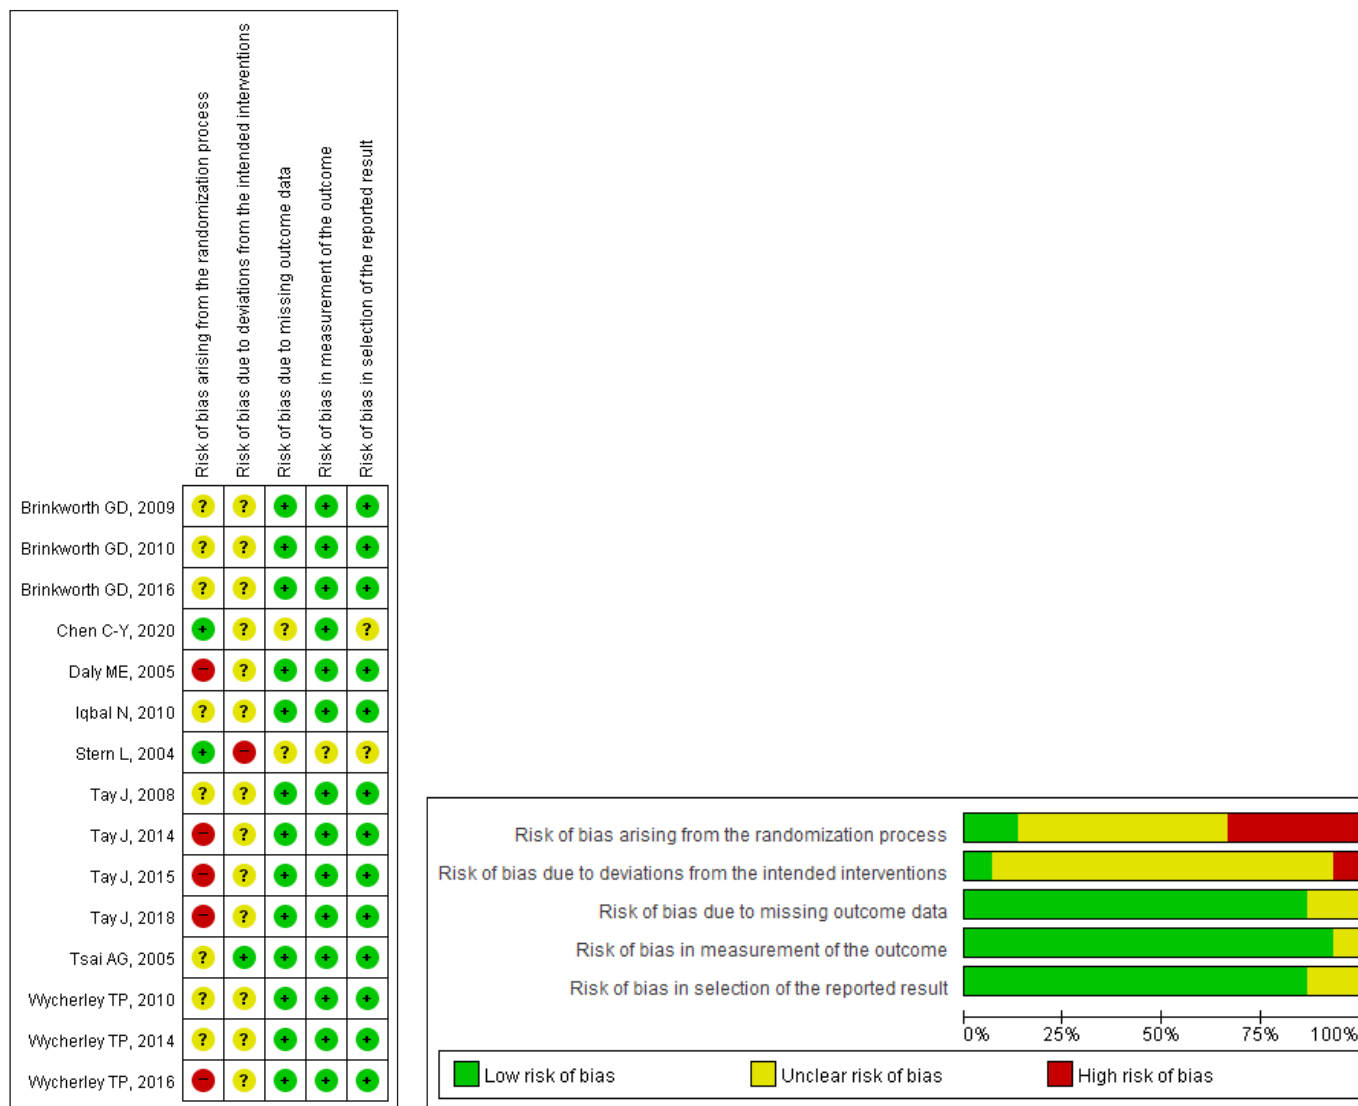

Supplementary Figure 23. Risk of bias assessment in studies evaluating the effects of carbohydrate-restricted diets in adults with hypertension.



**A**

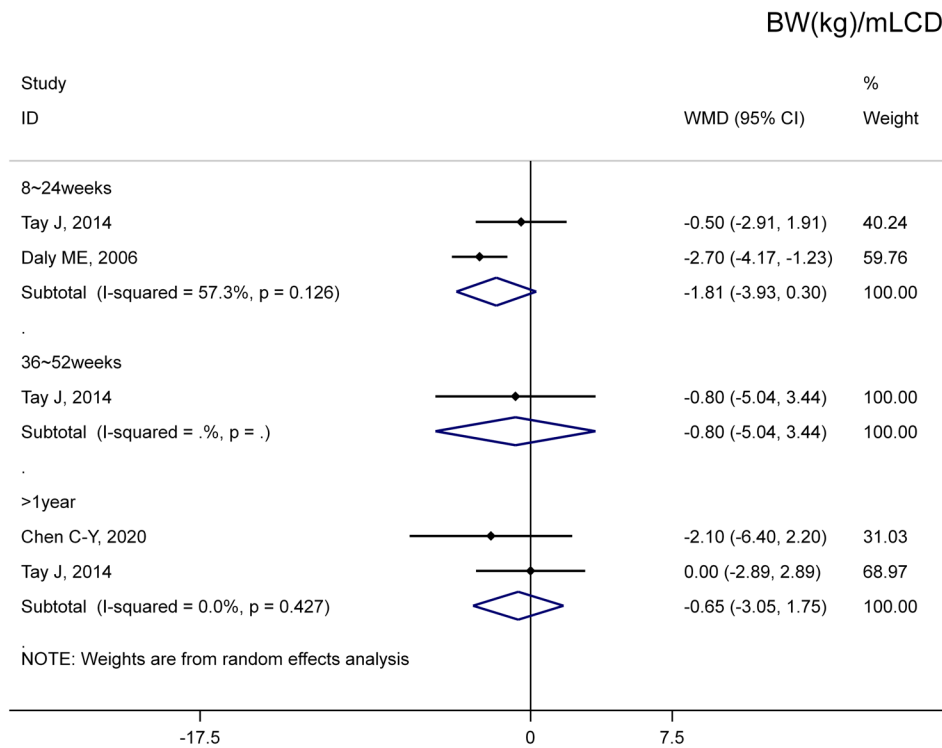

**B**

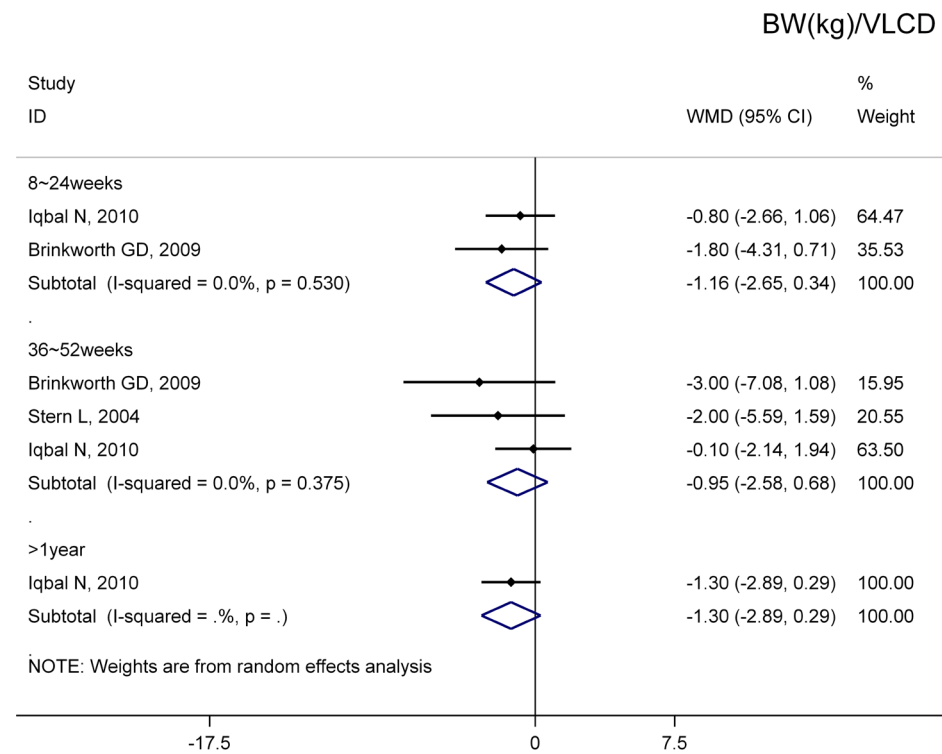

**Supplementary Figure 24.** Effects of carbohydrate-restricted diets on body weight (BW) in adults with hypertension. (A) Moderately-low or low carbohydrate diets (mLCD). (B) Very-low carbohydrate diets (VLCD). WMD, weighted mean difference; CI, confidence interval.

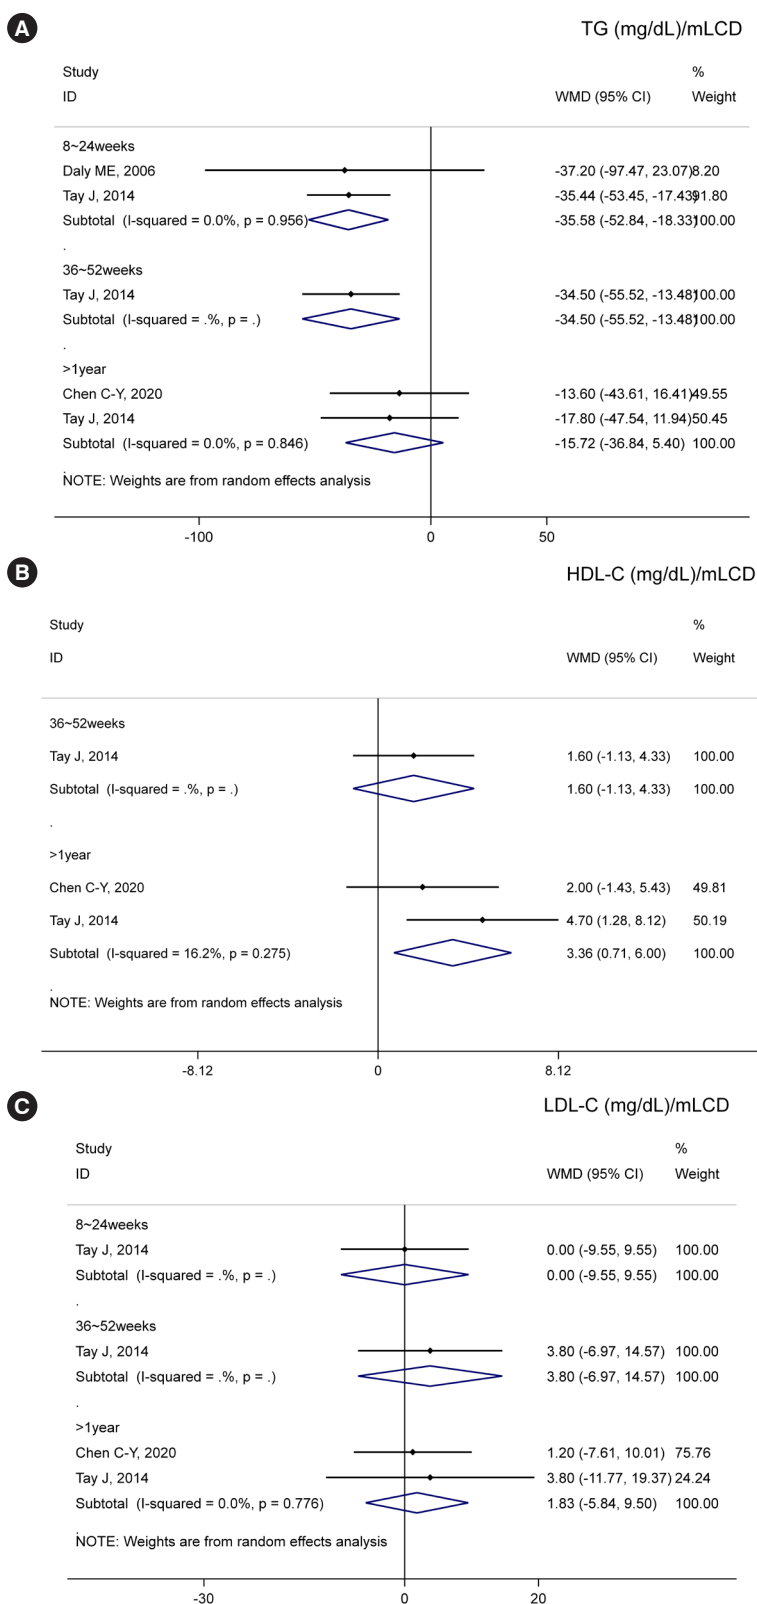

**Supplementary Figure 25.** Effects of carbohydrate-restricted diets on lipid profile in adults with hypertension. (A) Moderately-low or low carbohydrate diets (mLCD) on triglyceride (TG). (B) mLCD on high-density lipoprotein cholesterol (HDL-C). (C) mLCD on low-density lipoprotein cholesterol (LDL-C).

(Continued to the next page)

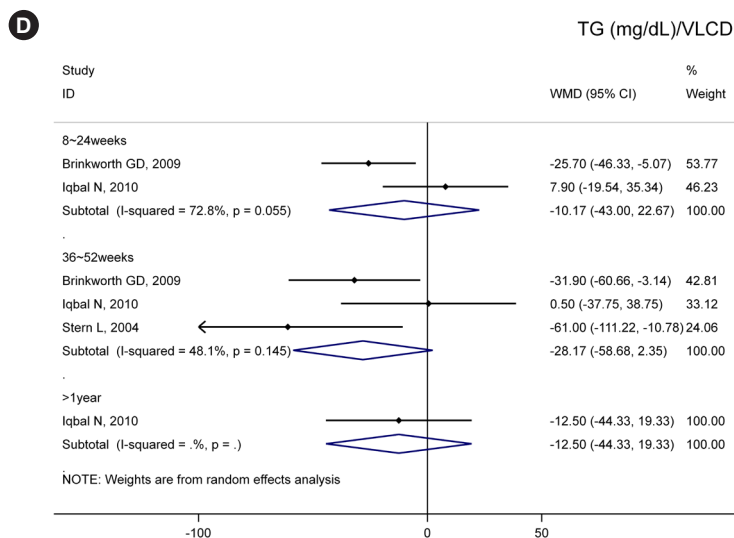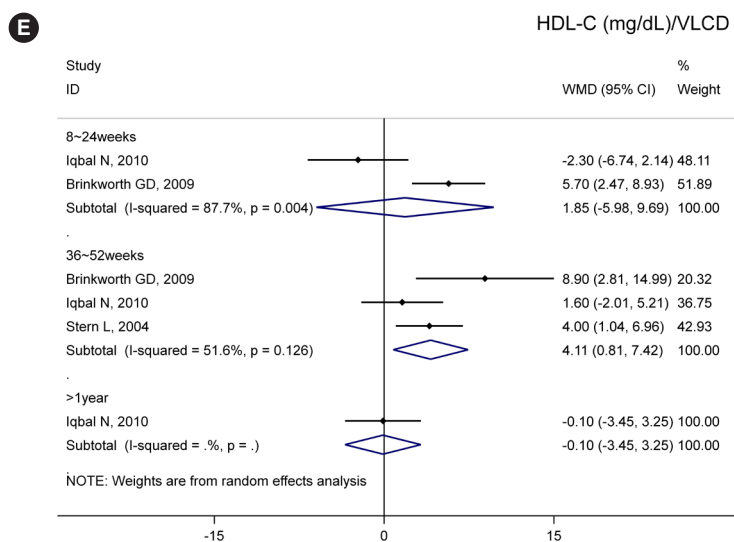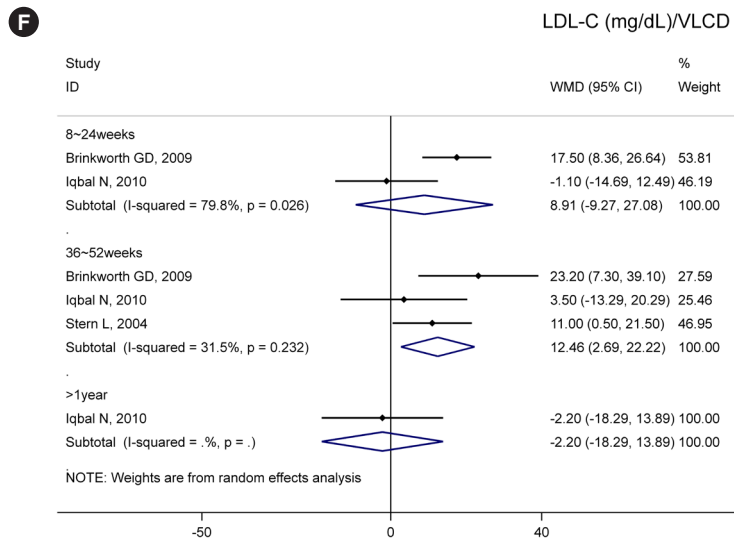

Supplementary Figure 25. (Continued) (D) Very-low carbohydrate diets (VLCD) on TG. (E) VLCD on HDL-C. (F) VLCD on LDL-C. WMD, weighted mean difference; CI, confidence interval.
